# Supplementary material for: Soil volatile organic compound emissions in response to soil warming and nitrogen deposition
Source: Oxford University Press journal article supplement (doi:10.1525/elementa.2021.00065), 2022-01-01
Supplement: suppplementary_table_2.xlsx [file suppplementary_table_2.xlsx]

## Sheet: Suppplementary Table 2
Supplementary Table 2. Complete list of VOCs by sampling date, treatment, and their emission rate. Benzenoids (Bz), monoterpenoids (MT), sesquiterpenoids (ST).
Relative Retention Time	Molecular Formula	Class	VOC	Treatment	Year	Month	Plot	Mass (ng)	sample	emission rate (ug m-2 h-1)
0.77	C6H8O2	acid	sorbic acid	control	2018	June	1	0.209794	1_c	0.12
0.77	C6H8O2	acid	sorbic acid	control	2018	June	12	0.212494	12_c	0.12
0.944	C8H16O	alcohol	1-octen-3-ol	control	2018	June	1	0.328025	1_c	0.08
2.344	C16H34O	alcohol	1-hexadecanol	control	2018	August	1	0.673204	1_c	0.22
0.944	C8H16O	alcohol	1-octen-3-ol	control	2018	June	19	0.492903	19_c	0.25
1.043	C8H18O	alcohol	2-ethyl-1-hexanol	control	2018	June	1	2.02679	1_c	0.31
2.344	C16H34O	alcohol	1-hexadecanol	control	2018	August	12	0.766812	12_c	0.32
0.944	C8H16O	alcohol	1-octen-3-ol	control	2018	June	12	0.723217	12_c	0.53
2.344	C16H34O	alcohol	1-hexadecanol	control	2018	October	12	1.08482	12_c	0.64
1.043	C8H18O	alcohol	2-ethyl-1-hexanol	control	2018	August	1	5.06426	1_c	1.04
2.344	C16H34O	alcohol	1-hexadecanol	control	2018	October	19	1.4786	19_c	1.05
2.344	C16H34O	alcohol	1-hexadecanol	control	2018	October	1	1.51057	1_c	1.14
1.043	C8H18O	alcohol	2-ethyl-1-hexanol	control	2018	October	12	3.15391	12_c	1.3
2.344	C16H34O	alcohol	1-hexadecanol	control	2018	August	19	1.76173	19_c	1.4
1.043	C8H18O	alcohol	2-ethyl-1-hexanol	control	2018	June	12	3.23017	12_c	1.66
1.043	C8H18O	alcohol	2-ethyl-1-hexanol	control	2018	October	1	6.08034	1_c	4.69
1.043	C8H18O	alcohol	2-ethyl-1-hexanol	control	2018	October	19	6.47653	19_c	4.9
1.043	C8H18O	alcohol	2-ethyl-1-hexanol	control	2018	August	19	8.91042	19_c	5.11
1.709	C12H22O	aldehyde	aldehyde	control	2018	August	19	0.0194322	19_c	0.01
1.687	C12H22O	aldehyde	2-butyl-2-octenal	control	2018	June	12	0.0671115	12_c	0.02
1.687	C12H22O	aldehyde	2-butyl-2-octenal	control	2018	June	19	0.0779813	19_c	0.03
1.687	C12H22O	aldehyde	2-butyl-2-octenal	control	2018	June	1	0.108069	1_c	0.06
1.57	C11H22O	aldehyde	undecanal	control	2018	October	1	0.278461	1_c	0.11
1.198	C9H18O	aldehyde	nonanal	control	2018	October	19	3.05507	19_c	0.13
1.57	C11H22O	aldehyde	undecanal	control	2018	August	1	0.333121	1_c	0.17
1.57	C11H22O	aldehyde	undecanal	control	2018	October	19	0.356903	19_c	0.18
0.587	C6H12O	aldehyde	hexanal	control	2018	October	1	1.13829	1_c	0.28
0.995	C8H16O	aldehyde	octanal	control	2018	October	19	2.03424	19_c	0.28
0.587	C6H12O	aldehyde	hexanal	control	2018	October	12	1.18597	12_c	0.32
1.198	C9H18O	aldehyde	nonanal	control	2018	August	1	2.74671	1_c	0.35
1.57	C11H22O	aldehyde	undecanal	control	2018	August	19	0.510988	19_c	0.36
1.198	C9H18O	aldehyde	nonanal	control	2018	October	1	3.16924	1_c	0.38
1.388	C10H20O	aldehyde	decanal	control	2018	August	1	1.90191	1_c	0.51
0.691	C6H10O	aldehyde	trans-2-hexen-1-al	control	2018	June	19	4.00207	19_c	0.76
0.587	C6H12O	aldehyde	hexanal	control	2018	August	12	1.3257	12_c	0.83
1.198	C9H18O	aldehyde	nonanal	control	2018	August	19	3.33174	19_c	0.9
0.995	C8H16O	aldehyde	octanal	control	2018	August	19	2.41131	19_c	0.96
0.587	C6H12O	aldehyde	hexanal	control	2018	August	19	1.5634	19_c	1.06
1.388	C10H20O	aldehyde	decanal	control	2018	August	19	2.4903	19_c	1.09
0.995	C8H16O	aldehyde	octanal	control	2018	June	1	3.40918	1_c	1.47
1.388	C10H20O	aldehyde	decanal	control	2018	June	1	5.06075	1_c	1.75
0.691	C6H10O	aldehyde	trans-2-hexen-1-al	control	2018	June	12	5.62354	12_c	2.71
0.42	C6H12O	aldehyde	ovoc	control	2018	June	12	6.45686	12_c	3.38
0.691	C6H10O	aldehyde	trans-2-hexen-1-al	control	2018	June	1	6.28139	1_c	3.53
0.995	C8H16O	aldehyde	octanal	control	2018	June	12	5.60607	12_c	3.93
0.995	C8H16O	aldehyde	octanal	control	2018	June	19	5.98047	19_c	4.19
1.388	C10H20O	aldehyde	decanal	control	2018	June	19	8.65591	19_c	5.55
1.198	C9H18O	aldehyde	nonanal	control	2018	June	1	12.1422	1_c	5.55
0.587	C6H12O	aldehyde	hexanal	control	2018	June	12	10.3479	12_c	6.38
1.388	C10H20O	aldehyde	decanal	control	2018	June	12	12.3213	12_c	9.94
1.198	C9H18O	aldehyde	nonanal	control	2018	June	12	18.368	12_c	12.49
1.198	C9H18O	aldehyde	nonanal	control	2018	June	19	31.7035	19_c	26.79
0.406	C8H18	alkane	2,2,3,3-tetramethyl-butane	control	2018	August	19	0.205467	19_c	0.01
0.911		alkane	alkane	control	2018	August	12	0.00964538	12_c	0.01
0.63	C9H20	alkane	2,4-dimethyl-heptane	control	2018	August	12	0.434856	12_c	0.01
1.093	C10H20	alkane	alkane	control	2018	August	12	0.0256921	12_c	0.01
1.599	C15H32	alkane	2,6,10-trimethyl-dodecane	control	2018	June	12	0.154946	12_c	0.01
1.608	C16H34	alkane	2,2,4,4,6,8,8-heptamethyl-nonane	control	2018	June	1	0.0792605	1_c	0.01
1.52	C15H32	alkane	2,6,11-trimethyl-dodecane	control	2018	June	1	0.0305367	1_c	0.01
1.093	C10H20	alkane	alkane	control	2018	June	19	0.0584383	19_c	0.01
1.093	C10H20	alkane	alkane	control	2018	October	12	0.0285983	12_c	0.01
1.093	C10H20	alkane	alkane	control	2018	October	19	0.0316438	19_c	0.01
2.36		alkane	alkane	control	2018	August	12	0.507646	12_c	0.02
1.093	C10H20	alkane	alkane	control	2018	August	19	0.0345253	19_c	0.02
1.52	C15H32	alkane	2,6,11-trimethyl-dodecane	control	2018	June	19	0.0332907	19_c	0.02
1.599	C15H32	alkane	2,6,10-trimethyl-dodecane	control	2018	June	1	0.159132	1_c	0.02
1.608	C16H34	alkane	2,2,4,4,6,8,8-heptamethyl-nonane	control	2018	June	19	0.0898787	19_c	0.02
1.374	C12H26	alkane	dodecane	control	2018	June	1	1.14877	1_c	0.02
1.141		alkane	alkane	control	2018	June	12	0.0922118	12_c	0.03
2.419	C20H32	alkane	m-camphorene	control	2018	June	1	0.142042	1_c	0.03
1.093	C10H20	alkane	alkane	control	2018	June	1	0.0729673	1_c	0.03
0.911		alkane	alkane	control	2018	June	1	0.0696768	1_c	0.03
2.451	C20H32	alkane	p-camphorene	control	2018	August	19	0.144542	19_c	0.04
1.608	C16H34	alkane	2,2,4,4,6,8,8-heptamethyl-nonane	control	2018	June	12	0.100402	12_c	0.04
0.911		alkane	alkane	control	2018	June	12	0.071102	12_c	0.04
1.599	C15H32	alkane	2,6,10-trimethyl-dodecane	control	2018	June	19	0.184173	19_c	0.04
2.277		alkane	alkane	control	2018	June	19	2.86588	19_c	0.04
0.339	C6H12	alkane	methyl cyclopentane	control	2018	June	19	0.444961	19_c	0.05
0.406	C8H18	alkane	2,2,3,3-tetramethyl-butane	control	2018	June	12	1.45718	12_c	0.05
2.419	C20H32	alkane	m-camphorene	control	2018	June	19	0.16702	19_c	0.05
2.451	C20H32	alkane	p-camphorene	control	2018	October	12	0.106417	12_c	0.05
0.605	C8H16	alkane	alkane	control	2018	October	12	0.241085	12_c	0.05
0.605	C8H16	alkane	alkane	control	2018	August	19	0.447011	19_c	0.06
2.169		alkane	alkane	control	2018	June	12	1.91478	12_c	0.07
0.63	C9H20	alkane	2,4-dimethyl-heptane	control	2018	October	19	0.376543	19_c	0.07
0.406	C8H18	alkane	2,2,3,3-tetramethyl-butane	control	2018	August	12	0.26231	12_c	0.08
2.419	C20H32	alkane	m-camphorene	control	2018	June	12	0.183753	12_c	0.08
0.605	C8H16	alkane	alkane	control	2018	October	1	0.263988	1_c	0.08
2.419	C20H32	alkane	m-camphorene	control	2018	October	12	0.145815	12_c	0.08
2.169		alkane	alkane	control	2018	August	12	0.185927	12_c	0.09
2.419	C20H32	alkane	m-camphorene	control	2018	August	19	0.215611	19_c	0.09
0.339	C6H12	alkane	methyl cyclopentane	control	2018	June	12	0.470029	12_c	0.09
1.093	C10H20	alkane	alkane	control	2018	June	12	0.121296	12_c	0.09
2.36		alkane	alkane	control	2018	June	12	2.98707	12_c	0.09
0.567	C8H16	alkane	3-methylene-heptane	control	2018	October	1	0.277826	1_c	0.09
0.63	C9H20	alkane	2,4-dimethyl-heptane	control	2018	October	12	0.389072	12_c	0.09
2.451	C20H32	alkane	p-camphorene	control	2018	October	1	0.147676	1_c	0.09
0.567	C8H16	alkane	3-methylene-heptane	control	2018	August	19	0.565595	19_c	0.1
2.451	C20H32	alkane	p-camphorene	control	2018	June	19	0.0873541	19_c	0.1
1.186	C11H24	alkane	undecane	control	2018	June	1	0.638324	1_c	0.1
2.451	C20H32	alkane	p-camphorene	control	2018	June	12	0.0913673	12_c	0.1
2.451	C20H32	alkane	p-camphorene	control	2018	October	19	0.159125	19_c	0.1
2.29		alkane	alkane	control	2018	August	1	0.535258	1_c	0.11
0.605	C8H16	alkane	alkane	control	2018	August	12	0.480099	12_c	0.11
0.389	C7H16	alkane	3-methyl-hexane	control	2018	August	1	1.90752	1_c	0.11
1.186	C11H24	alkane	undecane	control	2018	June	19	0.66878	19_c	0.11
0.306	C6H14	alkane	hexane	control	2018	October	1	0.961409	1_c	0.11
0.389	C7H16	alkane	3-methyl-hexane	control	2018	October	12	4.23979	12_c	0.11
1.552	C13H28	alkane	tridecane	control	2018	August	1	0.505475	1_c	0.12
2.419	C20H32	alkane	m-camphorene	control	2018	October	19	0.186622	19_c	0.12
1.186	C11H24	alkane	undecane	control	2018	August	1	0.417731	1_c	0.13
1.374	C12H26	alkane	dodecane	control	2018	June	19	1.28225	19_c	0.13
0.306	C6H14	alkane	hexane	control	2018	October	12	0.986762	12_c	0.13
1.141		alkane	alkane	control	2018	October	1	0.421641	1_c	0.13
2.419	C20H32	alkane	m-camphorene	control	2018	October	1	0.188804	1_c	0.13
2.446	C20H42	alkane	alkane	control	2018	June	12	3.21437	12_c	0.16
1.186	C11H24	alkane	undecane	control	2018	October	12	0.34657	12_c	0.16
0.587	C8H18	alkane	octane	control	2018	June	19	1.42466	19_c	0.17
0.389	C7H16	alkane	3-methyl-hexane	control	2018	June	12	1.04788	12_c	0.17
0.567	C8H16	alkane	3-methylene-heptane	control	2018	October	12	0.353891	12_c	0.17
2.027		alkane	alkane	control	2018	August	12	0.533488	12_c	0.19
1.186	C11H24	alkane	undecane	control	2018	October	1	0.378125	1_c	0.2
2.451	C20H32	alkane	p-camphorene	control	2018	June	1	0.185051	1_c	0.21
0.421	C7H16	alkane	heptane	control	2018	October	12	2.86568	12_c	0.21
2.027		alkane	alkane	control	2018	October	12	0.514809	12_c	0.21
0.285	C5H10	alkane	cyclopentane	control	2018	October	1	1.12732	1_c	0.22
2.169		alkane	alkane	control	2018	October	12	0.319814	12_c	0.23
0.605	C8H16	alkane	alkane	control	2018	October	19	0.409044	19_c	0.23
0.283	C6H14	alkane	2-methyl-pentane	control	2018	October	12	2.28654	12_c	0.26
1.877		alkane	alkane	control	2018	June	12	1.72328	12_c	0.27
1.186	C11H24	alkane	undecane	control	2018	June	12	0.801992	12_c	0.28
0.406	C8H18	alkane	2,2,3,3-tetramethyl-butane	control	2018	October	12	0.697301	12_c	0.28
1.552	C13H28	alkane	tridecane	control	2018	October	1	0.431335	1_c	0.28
1.374	C12H26	alkane	dodecane	control	2018	October	12	0.508663	12_c	0.28
0.306	C6H14	alkane	hexane	control	2018	August	19	0.836605	19_c	0.29
0.406	C8H18	alkane	2,2,3,3-tetramethyl-butane	control	2018	June	19	1.71295	19_c	0.29
1.552	C13H28	alkane	tridecane	control	2018	October	12	0.45042	12_c	0.3
0.406	C8H18	alkane	2,2,3,3-tetramethyl-butane	control	2018	October	19	0.733643	19_c	0.3
0.63	C9H20	alkane	2,4-dimethyl-heptane	control	2018	June	12	1.18113	12_c	0.31
2.277		alkane	alkane	control	2018	August	12	0.634472	12_c	0.32
2.169		alkane	alkane	control	2018	August	1	0.387946	1_c	0.32
2.027		alkane	alkane	control	2018	August	1	0.662236	1_c	0.35
0.306	C6H14	alkane	hexane	control	2018	June	19	2.02203	19_c	0.35
0.285	C5H10	alkane	cyclopentane	control	2018	June	19	1.79645	19_c	0.36
1.374	C12H26	alkane	dodecane	control	2018	October	1	0.567345	1_c	0.36
0.406	C8H18	alkane	2,2,3,3-tetramethyl-butane	control	2018	October	1	0.764221	1_c	0.36
2.169		alkane	alkane	control	2018	October	1	0.443033	1_c	0.37
1.141		alkane	alkane	control	2018	August	19	0.677575	19_c	0.39
0.567	C8H16	alkane	3-methylene-heptane	control	2018	October	19	0.557567	19_c	0.39
1.186	C11H24	alkane	undecane	control	2018	October	19	0.568728	19_c	0.39
1.105		alkane	alkane	control	2018	June	1	0.438306	1_c	0.41
0.587	C8H18	alkane	octane	control	2018	October	12	13.894	12_c	0.42
1.105		alkane	alkane	control	2018	June	19	0.462955	19_c	0.43
1.374	C12H26	alkane	dodecane	control	2018	August	1	0.872202	1_c	0.48
2.446	C20H42	alkane	alkane	control	2018	June	19	3.60101	19_c	0.5
2.545	C21H44	alkane	heneicosane	control	2018	June	19	3.61693	19_c	0.52
2.027		alkane	alkane	control	2018	October	1	0.782081	1_c	0.53
0.285	C5H10	alkane	cyclopentane	control	2018	June	1	1.90006	1_c	0.54
2.277		alkane	alkane	control	2018	August	1	0.831406	1_c	0.55
0.421	C7H16	alkane	heptane	control	2018	June	19	1.57383	19_c	0.56
0.587	C8H18	alkane	octane	control	2018	October	1	13.8872	1_c	0.56
2.652		alkane	alkane	control	2018	June	19	3.61138	19_c	0.57
0.389	C7H16	alkane	3-methyl-hexane	control	2018	October	19	4.75415	19_c	0.57
1.141		alkane	alkane	control	2018	August	12	0.824061	12_c	0.58
2.36		alkane	alkane	control	2018	June	19	3.49347	19_c	0.58
2.169		alkane	alkane	control	2018	October	19	0.661533	19_c	0.6
1.141		alkane	alkane	control	2018	October	12	0.853414	12_c	0.61
0.283	C6H14	alkane	2-methyl-pentane	control	2018	August	19	1.5215	19_c	0.64
0.421	C7H16	alkane	heptane	control	2018	August	1	1.85897	1_c	0.65
0.285	C5H10	alkane	cyclopentane	control	2018	October	12	1.52425	12_c	0.65
2.446	C20H42	alkane	alkane	control	2018	August	1	1.23637	1_c	0.66
2.652		alkane	alkane	control	2018	June	1	3.57832	1_c	0.67
2.027		alkane	alkane	control	2018	October	19	0.940751	19_c	0.67
0.283	C6H14	alkane	2-methyl-pentane	control	2018	October	19	2.71459	19_c	0.67
2.027		alkane	alkane	control	2018	June	12	2.77835	12_c	0.7
2.36		alkane	alkane	control	2018	August	1	1.11142	1_c	0.71
0.306	C6H14	alkane	hexane	control	2018	October	19	1.56369	19_c	0.74
1.141		alkane	alkane	control	2018	October	19	1.01821	19_c	0.77
0.587	C8H18	alkane	octane	control	2018	June	12	1.92324	12_c	0.78
0.238	C5H12	alkane	2-methyl-butane	control	2018	June	19	1.6598	19_c	0.78
2.29		alkane	alkane	control	2018	October	12	0.947643	12_c	0.78
2.29		alkane	alkane	control	2018	August	19	1.16235	19_c	0.79
1.141		alkane	alkane	control	2018	August	1	1.02076	1_c	0.81
2.29		alkane	alkane	control	2018	October	1	0.969702	1_c	0.81
2.169		alkane	alkane	control	2018	August	19	0.866159	19_c	0.84
0.285	C5H10	alkane	cyclopentane	control	2018	August	12	2.53307	12_c	0.88
0.238	C5H12	alkane	2-methyl-butane	control	2018	June	12	1.70728	12_c	0.88
1.374	C12H26	alkane	dodecane	control	2018	October	19	1.06729	19_c	0.89
1.552	C13H28	alkane	tridecane	control	2018	October	19	1.0148	19_c	0.91
2.277		alkane	alkane	control	2018	October	12	1.16539	12_c	0.95
2.36		alkane	alkane	control	2018	August	19	1.39214	19_c	0.98
0.421	C7H16	alkane	heptane	control	2018	June	12	1.92928	12_c	1
2.027		alkane	alkane	control	2018	August	19	1.27969	19_c	1.01
0.421	C7H16	alkane	heptane	control	2018	August	19	2.28285	19_c	1.05
0.285	C5H10	alkane	cyclopentane	control	2018	August	1	2.68389	1_c	1.08
0.587	C8H18	alkane	octane	control	2018	June	1	2.18818	1_c	1.1
0.238	C5H12	alkane	2-methyl-butane	control	2018	June	1	1.91582	1_c	1.14
2.36		alkane	alkane	control	2018	October	1	1.28683	1_c	1.18
0.421	C7H16	alkane	heptane	control	2018	October	19	3.81373	19_c	1.18
0.285	C5H10	alkane	cyclopentane	control	2018	October	19	2.0386	19_c	1.18
2.277		alkane	alkane	control	2018	October	1	1.38443	1_c	1.21
2.277		alkane	alkane	control	2018	August	19	1.45847	19_c	1.22
0.339	C6H12	alkane	methyl cyclopentane	control	2018	June	1	1.45219	1_c	1.22
0.63	C9H20	alkane	2,4-dimethyl-heptane	control	2018	October	1	1.37332	1_c	1.22
2.446	C20H42	alkane	alkane	control	2018	August	19	1.82171	19_c	1.26
2.36		alkane	alkane	control	2018	October	12	1.40098	12_c	1.29
2.29		alkane	alkane	control	2018	October	19	1.44543	19_c	1.3
0.285	C5H10	alkane	cyclopentane	control	2018	June	12	2.60572	12_c	1.32
2.446	C20H42	alkane	alkane	control	2018	October	1	1.54295	1_c	1.46
0.389	C7H16	alkane	3-methyl-hexane	control	2018	June	19	2.25004	19_c	1.48
2.277		alkane	alkane	control	2018	October	19	1.72772	19_c	1.54
0.406	C8H18	alkane	2,2,3,3-tetramethyl-butane	control	2018	August	1	1.56937	1_c	1.58
0.389	C7H16	alkane	3-methyl-hexane	control	2018	June	1	2.28822	1_c	1.61
0.389	C7H16	alkane	3-methyl-hexane	control	2018	August	19	3.37489	19_c	1.67
0.306	C6H14	alkane	hexane	control	2018	June	1	3.14633	1_c	1.72
2.545	C21H44	alkane	heneicosane	control	2018	June	12	4.6069	12_c	1.74
2.36		alkane	alkane	control	2018	October	19	1.83782	19_c	1.74
0.421	C7H16	alkane	heptane	control	2018	June	1	2.74901	1_c	1.96
2.446	C20H42	alkane	alkane	control	2018	October	12	1.9983	12_c	1.96
0.306	C6H14	alkane	hexane	control	2018	June	12	3.46093	12_c	2.04
1.186	C11H24	alkane	undecane	control	2018	August	19	2.25089	19_c	2.15
1.105		alkane	alkane	control	2018	June	12	2.91652	12_c	2.2
1.178		alkane	alkane	control	2018	June	12	2.35991	12_c	2.25
0.283	C6H14	alkane	2-methyl-pentane	control	2018	August	1	2.93115	1_c	2.31
0.306	C6H14	alkane	hexane	control	2018	August	1	2.73798	1_c	2.51
2.446	C20H42	alkane	alkane	control	2018	October	19	2.75412	19_c	2.74
0.587	C8H18	alkane	octane	control	2018	August	19	30.1284	19_c	2.96
1.105		alkane	alkane	control	2018	June	12	2.91652	12_c	3.23
0.406	C8H18	alkane	2,2,3,3-tetramethyl-butane	control	2018	June	1	5.00735	1_c	4.14
0.63	C9H20	alkane	2,4-dimethyl-heptane	control	2018	June	1	5.49395	1_c	5.27
2.545	C21H44	alkane	heneicosane	control	2018	June	1	7.71325	1_c	5.36
1.374	C12H26	alkane	dodecane	control	2018	August	19	6.52036	19_c	6.72
0.63	C9H20	alkane	2,4-dimethyl-heptane	control	2018	August	1	6.42415	1_c	6.88
0.587	C8H18	alkane	octane	control	2018	August	12	34.2908	12_c	8.5
1.552	C13H28	alkane	tridecane	control	2018	August	19	9.3113	19_c	9.87
0.571	C8H16	alkene	1-octene	control	2018	August	19	1.27324	19_c	0.01
0.401	C6H10	alkene	cyclohexene	control	2018	August	12	1.12793	12_c	0.07
0.636	C8H14	alkene	1,3-octadiene	control	2018	June	12	0.108932	12_c	0.07
0.401	C6H10	alkene	cyclohexene	control	2018	October	19	1.02656	19_c	0.08
0.571	C8H16	alkene	1-octene	control	2018	October	19	1.09183	19_c	0.12
0.401	C6H10	alkene	cyclohexene	control	2018	October	1	1.1228	1_c	0.23
0.471	C8H16	alkene	3,4,4-trimethyl-2-pentene	control	2018	August	12	1.44013	12_c	0.26
0.471	C8H16	alkene	3,4,4-trimethyl-2-pentene	control	2018	October	1	0.636674	1_c	0.26
0.401	C6H10	alkene	cyclohexene	control	2018	August	19	1.34006	19_c	0.27
0.571	C8H16	alkene	1-octene	control	2018	October	12	1.24664	12_c	0.33
0.471	C8H16	alkene	3,4,4-trimethyl-2-pentene	control	2018	October	12	0.718314	12_c	0.34
0.571	C8H16	alkene	1-octene	control	2018	August	12	1.66571	12_c	0.49
0.471	C8H16	alkene	3,4,4-trimethyl-2-pentene	control	2018	October	19	1.3657	19_c	1.04
0.766	C9H18	alkene	1-nonene	control	2018	June	12	3.59953	12_c	1.49
0.571	C8H16	alkene	1-octene	control	2018	June	12	5.06858	12_c	1.63
0.571	C8H16	alkene	1-octene	control	2018	June	1	5.92458	1_c	2.67
0.401	C6H10	alkene	cyclohexene	control	2018	June	1	6.1371	1_c	3.57
0.401	C6H10	alkene	cyclohexene	control	2018	August	1	4.95165	1_c	4.47
0.844	C9H12	Bz	(1-methylethyl)benzene	control	2018	June	12	0.028014	12_c	0.01
0.962	C9H10	Bz	a-methylstyrene	control	2018	August	12	0.124528	12_c	0.02
0.844	C9H12	Bz	(1-methylethyl)benzene	control	2018	June	1	0.0386099	1_c	0.02
0.781	C8H10	Bz	o-xylene	control	2018	October	12	0.264282	12_c	0.02
0.962	C9H10	Bz	a-methylstyrene	control	2018	October	12	0.116382	12_c	0.02
0.962	C9H10	Bz	a-methylstyrene	control	2018	August	1	0.127619	1_c	0.03
0.775	C8H8	Bz	styrene	control	2018	June	1	0.179632	1_c	0.07
0.54	C7H8	Bz	bz	control	2018	June	1	0.211994	1_c	0.07
0.962	C9H10	Bz	a-methylstyrene	control	2018	October	19	0.170389	19_c	0.08
0.781	C8H10	Bz	o-xylene	control	2018	August	19	0.324298	19_c	0.09
0.781	C8H10	Bz	o-xylene	control	2018	August	12	0.320958	12_c	0.09
0.781	C8H10	Bz	o-xylene	control	2018	October	1	0.3274	1_c	0.09
0.781	C8H10	Bz	o-xylene	control	2018	October	19	0.354647	19_c	0.11
0.987	C9H12	Bz	bz	control	2018	June	1	0.248891	1_c	0.12
0.775	C8H8	Bz	styrene	control	2018	June	12	0.248626	12_c	0.14
0.962	C9H10	Bz	a-methylstyrene	control	2018	August	19	0.241843	19_c	0.15
0.715	C8H10	Bz	ethylbenzene	control	2018	June	12	0.286954	12_c	0.15
0.987	C9H12	Bz	bz	control	2018	June	12	0.285512	12_c	0.16
0.535	C7H8	Bz	toluene	control	2018	October	19	1.93227	19_c	0.17
0.54	C7H8	Bz	bz	control	2018	June	12	0.342426	12_c	0.22
0.715	C8H10	Bz	ethylbenzene	control	2018	June	1	0.387285	1_c	0.27
0.732	C8H10	Bz	p-xylene	control	2018	August	12	1.14849	12_c	0.29
0.535	C7H8	Bz	toluene	control	2018	August	19	1.37403	19_c	0.34
0.781	C8H10	Bz	o-xylene	control	2018	June	12	0.761926	12_c	0.38
0.377	C6H6	Bz	benzene	control	2018	October	1	4.2957	1_c	0.91
0.535	C7H8	Bz	toluene	control	2018	August	12	1.88567	12_c	0.95
0.377	C6H6	Bz	benzene	control	2018	June	1	2.42437	1_c	1.11
0.377	C6H6	Bz	benzene	control	2018	October	12	4.53468	12_c	1.13
0.781	C8H10	Bz	o-xylene	control	2018	June	1	1.53533	1_c	1.28
0.732	C8H10	Bz	p-xylene	control	2018	June	12	6.43634	12_c	1.73
0.781	C8H10	Bz	o-xylene	control	2018	August	1	1.86303	1_c	1.86
0.377	C6H6	Bz	benzene	control	2018	August	1	5.69477	1_c	1.93
0.377	C6H6	Bz	benzene	control	2018	August	19	5.99904	19_c	2.05
0.535	C7H8	Bz	toluene	control	2018	August	1	2.93656	1_c	2.18
0.377	C6H6	Bz	benzene	control	2018	October	19	5.86598	19_c	2.49
0.732	C8H10	Bz	p-xylene	control	2018	August	1	3.37876	1_c	2.86
0.535	C7H8	Bz	toluene	control	2018	June	12	5.06335	12_c	3.19
0.377	C6H6	Bz	benzene	control	2018	June	12	4.61678	12_c	3.58
0.377	C6H6	Bz	benzene	control	2018	August	12	7.24081	12_c	3.62
0.535	C7H8	Bz	toluene	control	2018	June	1	5.75401	1_c	4.04
0.732	C8H10	Bz	p-xylene	control	2018	June	1	10.4283	1_c	6.38
0.547	C6H12O2	ester	butanoic acid, 2-methyl-, methyl ester	control	2018	August	19	0.0152579	19_c	0.01
2.549	C20H40O2	ester	dodecanoic acid, isooctyl ester	control	2018	August	1	2.23093	1_c	0.01
0.402	C5H10O2	ester	methyl isobutyrate	control	2018	August	1	0.0200674	1_c	0.01
0.338	C4H8O2	ester	methyl propionate	control	2018	August	19	0.0399035	19_c	0.01
0.588	C6H12O2	ester	butanoic acid, ethyl ester	control	2018	June	1	0.0195213	1_c	0.01
0.613	C6H12O2	ester	acetic acid, butyl ester	control	2018	June	1	0.0549579	1_c	0.01
0.456	C5H10O2	ester	butanoic acid, methyl ester	control	2018	June	12	0.0100856	12_c	0.01
0.456	C5H10O2	ester	butanoic acid, methyl ester	control	2018	June	1	0.0115111	1_c	0.01
0.338	C4H8O2	ester	methyl propionate	control	2018	October	12	0.0631284	12_c	0.01
0.338	C4H8O2	ester	methyl propionate	control	2018	October	19	0.0702151	19_c	0.01
1.442	C11H22O2	ester	butanoic acid, 2-methyl-, hexyl ester	control	2018	June	12	0.0196711	12_c	0.02
0.338	C4H8O2	ester	methyl propionate	control	2018	August	1	0.04956	1_c	0.03
0.402	C5H10O2	ester	methyl isobutyrate	control	2018	August	19	0.0347038	19_c	0.03
0.588	C6H12O2	ester	butanoic acid, ethyl ester	control	2018	June	19	0.0461235	19_c	0.03
1	C8H14O2	ester	cis-3-hexenyl acetate	control	2018	June	19	0.168172	19_c	0.04
0.321	C4H8O2	ester	ethyl acetate	control	2018	June	19	0.415546	19_c	0.04
0.613	C6H12O2	ester	acetic acid, butyl ester	control	2018	June	19	0.0979129	19_c	0.05
0.338	C4H8O2	ester	methyl propionate	control	2018	June	19	0.155738	19_c	0.06
0.338	C4H8O2	ester	methyl propionate	control	2018	June	12	0.165846	12_c	0.08
1.351	C10H18O2	ester	cis-3-hexenyl butyrate	control	2018	June	12	0.16415	12_c	0.09
0.439	C5H8O2	ester	methyl methacrylate	control	2018	August	19	0.341198	19_c	0.1
2.298	C17H34O2	ester	isopropyl myristate	control	2018	June	19	2.15499	19_c	0.1
0.735	C7H14O2	ester	1-butanol, 3-methyl-, acetate	control	2018	June	1	0.235357	1_c	0.1
0.613	C6H12O2	ester	acetic acid, butyl ester	control	2018	June	12	0.139794	12_c	0.1
0.588	C6H12O2	ester	butanoic acid, ethyl ester	control	2018	June	12	0.145926	12_c	0.15
2.549	C20H40O2	ester	dodecanoic acid, isooctyl ester	control	2018	June	19	1.16063	19_c	0.16
1.012	C8H16O2	ester	acetic acid, hexyl ester	control	2018	June	1	0.586396	1_c	0.16
0.439	C5H8O2	ester	methyl methacrylate	control	2018	October	19	0.372282	19_c	0.16
0.735	C7H14O2	ester	1-butanol, 3-methyl-, acetate	control	2018	June	12	0.3093	12_c	0.18
0.741	C7H14O2	ester	1-butanol, 2-methyl-, acetate	control	2018	June	12	0.250249	12_c	0.21
0.338	C4H8O2	ester	methyl propionate	control	2018	June	1	0.287076	1_c	0.22
1.012	C8H16O2	ester	acetic acid, hexyl ester	control	2018	June	19	0.66301	19_c	0.22
0.321	C4H8O2	ester	ethyl acetate	control	2018	June	1	0.691781	1_c	0.37
0.321	C4H8O2	ester	ethyl acetate	control	2018	June	12	0.702324	12_c	0.38
0.439	C5H8O2	ester	methyl methacrylate	control	2018	August	1	0.604923	1_c	0.42
1.351	C10H18O2	ester	cis-3-hexenyl butyrate	control	2018	June	1	0.551323	1_c	0.54
1	C8H14O2	ester	cis-3-hexenyl acetate	control	2018	June	1	0.639191	1_c	0.58
2.549	C20H40O2	ester	dodecanoic acid, isooctyl ester	control	2018	June	12	1.5622	12_c	0.64
1	C8H14O2	ester	cis-3-hexenyl acetate	control	2018	June	12	0.79215	12_c	0.75
1.012	C8H16O2	ester	acetic acid, hexyl ester	control	2018	June	12	1.74102	12_c	1.47
2.298	C17H34O2	ester	isopropyl myristate	control	2018	June	12	3.99084	12_c	2.24
2.549	C20H40O2	ester	dodecanoic acid, isooctyl ester	control	2018	August	19	4.82789	19_c	2.81
2.549	C20H40O2	ester	dodecanoic acid, isooctyl ester	control	2018	October	1	3.93085	1_c	2.99
2.549	C20H40O2	ester	dodecanoic acid, isooctyl ester	control	2018	October	12	3.97499	12_c	3
2.549	C20H40O2	ester	dodecanoic acid, isooctyl ester	control	2018	October	19	6.43715	19_c	5.62
0.338	C4H8O	furan	tetrahydrofuran	control	2018	October	12	0.108327	12_c	0.03
0.382	C5H10O	furan	furan	control	2018	June	19	0.206739	19_c	0.04
0.338	C4H8O	furan	tetrahydrofuran	control	2018	October	1	0.123369	1_c	0.04
0.338	C4H8O	furan	tetrahydrofuran	control	2018	August	19	0.191996	19_c	0.07
0.313	C5H6O	furan	2-methylfuran	control	2018	October	1	0.671457	1_c	0.09
0.382	C5H10O	furan	furan	control	2018	June	12	0.25841	12_c	0.1
0.338	C4H8O	furan	tetrahydrofuran	control	2018	October	19	0.180659	19_c	0.1
0.382	C5H10O	furan	furan	control	2018	June	1	0.273015	1_c	0.12
0.338	C4H8O	furan	tetrahydrofuran	control	2018	August	1	0.276504	1_c	0.17
0.338	C4H8O	furan	tetrahydrofuran	control	2018	June	1	0.691233	1_c	0.3
0.313	C5H6O	furan	2-methylfuran	control	2018	October	12	0.862506	12_c	0.3
0.653	C5H4O2	furan	2-furaldehyde	control	2018	October	12	0.715894	12_c	0.32
0.313	C5H6O	furan	2-methylfuran	control	2018	August	19	1.08803	19_c	0.33
0.313	C5H6O	furan	2-methylfuran	control	2018	August	12	1.09662	12_c	0.36
0.313	C5H6O	furan	2-methylfuran	control	2018	October	19	0.960348	19_c	0.39
0.653	C5H4O2	furan	2-furaldehyde	control	2018	October	19	0.819123	19_c	0.41
0.653	C5H4O2	furan	2-furaldehyde	control	2018	October	1	0.807848	1_c	0.43
0.313	C5H6O	furan	2-methylfuran	control	2018	August	1	1.16406	1_c	0.45
0.313	C5H6O	furan	2-methylfuran	control	2018	June	1	1.37054	1_c	0.48
0.653	C5H4O2	furan	2-furaldehyde	control	2018	August	12	0.470385	12_c	0.53
0.313	C5H6O	furan	2-methylfuran	control	2018	June	12	1.73251	12_c	0.87
0.382	C5H8O	furan	2-ethylacrolein	control	2018	August	19	5.47777	19_c	0.93
0.653	C5H4O2	furan	2-furaldehyde	control	2018	August	19	1.02285	19_c	1.13
0.653	C5H4O2	furan	2-furaldehyde	control	2018	August	1	0.993323	1_c	1.14
0.653	C5H4O2	furan	2-furaldehyde	control	2018	June	12	3.18177	12_c	1.68
0.653	C5H4O2	furan	2-furaldehyde	control	2018	June	19	3.35238	19_c	1.78
0.382	C5H8O	furan	2-ethylacrolein	control	2018	October	12	4.66588	12_c	2.13
1.664	C8H6O2	furan	1(3h)-isobenzofuranone	control	2018	June	12	2.98927	12_c	2.26
0.653	C5H4O2	furan	2-furaldehyde	control	2018	June	1	4.31231	1_c	3.01
0.338	C4H8O	furan	tetrahydrofuran	control	2018	June	19	3.83979	19_c	3.76
0.382	C5H8O	furan	2-ethylacrolein	control	2018	October	19	6.26675	19_c	3.78
0.382	C5H8O	furan	2-ethylacrolein	control	2018	August	12	8.83168	12_c	4.88
0.338	C4H8O	furan	tetrahydrofuran	control	2018	June	12	6.36833	12_c	6.74
1.077	C6H4Cl2	halogen	1,4-dichloro-benzene	control	2018	October	12	0.158425	12_c	0.01
1.077	C6H4Cl2	halogen	1,4-dichloro-benzene	control	2018	August	12	0.217515	12_c	0.02
1.077	C6H4Cl2	halogen	1,4-dichloro-benzene	control	2018	June	12	0.244613	12_c	0.02
1.077	C6H4Cl2	halogen	1,4-dichloro-benzene	control	2018	October	1	0.389495	1_c	0.28
1.077	C6H4Cl2	halogen	1,4-dichloro-benzene	control	2018	June	1	0.67419	1_c	0.52
1.077	C6H4Cl2	halogen	1,4-dichloro-benzene	control	2018	August	1	2.0518	1_c	2.12
0.228	C5H8	isoprene	isoprene	control	2018	October	12	2.43113	12_c	0.25
0.228	C5H8	isoprene	isoprene	control	2018	October	19	3.32001	19_c	1.17
0.228	C5H8	isoprene	isoprene	control	2018	June	12	5.25765	12_c	1.66
0.228	C5H8	isoprene	isoprene	control	2018	June	19	7.15721	19_c	3.62
0.228	C5H8	isoprene	isoprene	control	2018	June	1	7.85886	1_c	4.7
0.228	C5H8	isoprene	isoprene	control	2018	August	1	11.2894	1_c	6.49
1.812	C13H22O	ketone	6,10-dimethyl-5,9-undecadien-2-one	control	2018	October	12	0.07637	12_c	0.01
1.812	C13H22O	ketone	6,10-dimethyl-5,9-undecadien-2-one	control	2018	October	19	0.0940059	19_c	0.02
1.812	C13H22O	ketone	6,10-dimethyl-5,9-undecadien-2-one	control	2018	August	1	0.101843	1_c	0.03
0.404	C5H10O	ketone	2-pentanone	control	2018	August	12	0.419963	12_c	0.04
0.404	C5H10O	ketone	2-pentanone	control	2018	October	12	0.322343	12_c	0.07
0.404	C5H10O	ketone	2-pentanone	control	2018	August	1	0.44515	1_c	0.08
0.418	C5H10O	ketone	3-pentanone	control	2018	June	1	0.626441	1_c	0.08
0.404	C5H10O	ketone	2-pentanone	control	2018	October	19	0.370022	19_c	0.12
0.305	C4H6O	ketone	2-butanone	control	2018	August	12	2.24385	12_c	0.13
1.812	C13H22O	ketone	6,10-dimethyl-5,9-undecadien-2-one	control	2018	August	19	0.214261	19_c	0.15
0.404	C5H10O	ketone	2-pentanone	control	2018	August	19	0.528157	19_c	0.15
0.305	C4H6O	ketone	2-butanone	control	2018	October	1	1.87061	1_c	0.15
0.418	C5H10O	ketone	3-pentanone	control	2018	October	12	0.530652	12_c	0.15
1.812	C13H22O	ketone	6,10-dimethyl-5,9-undecadien-2-one	control	2018	October	1	0.209882	1_c	0.16
0.418	C5H10O	ketone	3-pentanone	control	2018	October	19	0.553214	19_c	0.16
1.812	C13H22O	ketone	6,10-dimethyl-5,9-undecadien-2-one	control	2018	June	12	0.421917	12_c	0.25
0.404	C5H10O	ketone	2-pentanone	control	2018	June	12	0.739464	12_c	0.36
0.418	C5H10O	ketone	3-pentanone	control	2018	June	12	0.912477	12_c	0.4
0.418	C5H10O	ketone	3-pentanone	control	2018	August	19	0.882366	19_c	0.41
1.812	C13H22O	ketone	6,10-dimethyl-5,9-undecadien-2-one	control	2018	June	1	0.560493	1_c	0.42
0.305	C4H6O	ketone	2-butanone	control	2018	October	12	2.19403	12_c	0.5
1.812	C13H22O	ketone	6,10-dimethyl-5,9-undecadien-2-one	control	2018	June	19	0.678941	19_c	0.53
0.297	C4H6O	ketone	methyl vinyl ketone	control	2018	August	19	6.08393	19_c	0.58
0.962	C8H14O	ketone	6-methyl-5-hepten-2-one	control	2018	June	19	1.78765	19_c	0.64
0.962	C8H14O	ketone	6-methyl-5-hepten-2-one	control	2018	June	1	1.73957	1_c	0.65
0.305	C4H6O	ketone	2-butanone	control	2018	August	19	2.83418	19_c	0.72
0.297	C4H6O	ketone	methyl vinyl ketone	control	2018	October	1	3.80673	1_c	0.74
0.305	C4H6O	ketone	2-butanone	control	2018	October	19	2.46792	19_c	0.74
0.765	C7H14O	ketone	2-heptanone	control	2018	June	12	1.41127	12_c	0.91
0.297	C4H6O	ketone	methyl vinyl ketone	control	2018	October	19	4.12854	19_c	0.95
0.305	C4H6O	ketone	2-butanone	control	2018	June	1	4.39508	1_c	1.64
0.305	C4H6O	ketone	2-butanone	control	2018	June	12	4.43889	12_c	1.64
0.962	C8H14O	ketone	6-methyl-5-hepten-2-one	control	2018	June	12	2.87149	12_c	1.92
0.297	C4H6O	ketone	methyl vinyl ketone	control	2018	October	12	4.98477	12_c	2.04
0.297	C4H6O	ketone	methyl vinyl ketone	control	2018	August	1	7.98016	1_c	2.99
1.05	C10H14	MT	p-cymene	control	2018	August	19	0.222166	19_c	0.01
0.848	C10H16	MT	b-thujene	control	2018	June	12	0.0333089	12_c	0.01
1.022	C10H16	MT	3-carene	control	2018	June	1	0.0651944	1_c	0.01
1.361	C10H12	MT	mt	control	2018	June	12	0.0161479	12_c	0.01
0.866	C10H16	MT	a-pinene	control	2018	October	12	0.028667	12_c	0.01
0.866	C10H16	MT	a-pinene	control	2018	October	19	0.0333016	19_c	0.01
0.958	C10H16	MT	b-pinene	control	2018	June	12	0.0391143	12_c	0.02
0.973	C10H16	MT	myrcene	control	2018	June	19	0.137415	19_c	0.02
0.973	C10H16	MT	myrcene	control	2018	June	1	0.137668	1_c	0.02
0.958	C10H16	MT	b-pinene	control	2018	October	12	0.0383672	12_c	0.02
0.958	C10H16	MT	b-pinene	control	2018	October	19	0.0408807	19_c	0.02
0.958	C10H16	MT	b-pinene	control	2018	October	1	0.0401049	1_c	0.02
0.958	C10H16	MT	b-pinene	control	2018	August	19	0.0570638	19_c	0.03
0.958	C10H16	MT	b-pinene	control	2018	August	1	0.0563258	1_c	0.03
0.866	C10H16	MT	a-pinene	control	2018	August	1	0.0597453	1_c	0.03
1.009	C10H16	MT	a-phellandrene	control	2018	October	1	0.119625	1_c	0.03
1.177	C10H16	MT	terpinolene	control	2018	October	12	0.102255	12_c	0.03
0.866	C10H16	MT	a-pinene	control	2018	August	19	0.0652893	19_c	0.04
1.177	C10H16	MT	terpinolene	control	2018	October	1	0.106504	1_c	0.04
1.177	C10H16	MT	terpinolene	control	2018	August	19	0.207201	19_c	0.05
1.177	C10H16	MT	terpinolene	control	2018	June	19	0.0777098	19_c	0.05
1.034	C10H16	MT	mt	control	2018	June	19	0.0484588	19_c	0.05
0.973	C10H16	MT	myrcene	control	2018	October	1	0.185583	1_c	0.06
1.009	C10H16	MT	a-phellandrene	control	2018	October	12	0.140667	12_c	0.06
0.9	C10H16	MT	camphene	control	2018	October	12	0.376661	12_c	0.06
1.177	C10H16	MT	terpinolene	control	2018	October	19	0.127923	19_c	0.06
0.973	C10H16	MT	myrcene	control	2018	June	12	0.183753	12_c	0.08
1.117	C10H16	MT	y-terpinene	control	2018	June	19	0.151357	19_c	0.08
1.087	C10H16	MT	ocimene	control	2018	October	12	0.191574	12_c	0.08
1.009	C10H16	MT	a-phellandrene	control	2018	October	19	0.170618	19_c	0.09
0.973	C10H16	MT	myrcene	control	2018	October	12	0.23338	12_c	0.11
1.009	C10H16	MT	a-phellandrene	control	2018	August	19	0.260939	19_c	0.13
0.973	C10H16	MT	myrcene	control	2018	October	19	0.267006	19_c	0.14
1.087	C10H16	MT	ocimene	control	2018	August	19	0.399157	19_c	0.16
1.087	C10H16	MT	ocimene	control	2018	October	19	0.269662	19_c	0.16
0.9	C10H16	MT	camphene	control	2018	October	19	0.488566	19_c	0.17
1.009	C10H16	MT	a-phellandrene	control	2018	June	12	0.231467	12_c	0.2
0.973	C10H16	MT	myrcene	control	2018	August	19	0.399909	19_c	0.24
0.9	C10H16	MT	camphene	control	2018	August	19	0.848069	19_c	0.25
0.973	C10H16	MT	myrcene	control	2018	August	1	0.403429	1_c	0.26
1.117	C10H16	MT	y-terpinene	control	2018	June	12	0.305397	12_c	0.26
1.177	C10H16	MT	terpinolene	control	2018	June	12	0.266304	12_c	0.26
1.087	C10H16	MT	ocimene	control	2018	October	1	0.349016	1_c	0.26
1.087	C10H16	MT	ocimene	control	2018	August	1	0.522869	1_c	0.32
0.9	C10H16	MT	camphene	control	2018	August	12	0.895277	12_c	0.32
1.087	C10H16	MT	ocimene	control	2018	June	1	1.14208	1_c	0.32
1.087	C10H16	MT	ocimene	control	2018	June	12	1.3474	12_c	0.55
1.059	C10H16	MT	d-limonene	control	2018	October	1	1.78288	1_c	0.57
0.843	C10H16	MT	a-tricyclene	control	2018	June	12	1.10789	12_c	0.65
1.059	C10H16	MT	d-limonene	control	2018	October	19	2.1193	19_c	0.87
1.059	C10H16	MT	d-limonene	control	2018	October	12	2.15879	12_c	0.97
0.9	C10H16	MT	camphene	control	2018	August	1	1.53176	1_c	1.06
1.05	C10H14	MT	p-cymene	control	2018	June	12	7.71244	12_c	2.76
1.059	C10H16	MT	d-limonene	control	2018	June	19	15.0585	19_c	4.82
1.059	C10H16	MT	d-limonene	control	2018	August	1	6.81227	1_c	6.09
1.059	C10H16	MT	d-limonene	control	2018	August	19	8.26937	19_c	7.45
0.9	C10H16	MT	camphene	control	2018	June	12	17.3586	12_c	12.1
1.059	C10H16	MT	d-limonene	control	2018	June	12	74.3063	12_c	72.54
1.037	C7H9N	nitro	4-cyanocyclohexene	control	2018	October	1	0.0398321	1_c	0.01
2.281	C10H15NO2S	nitro	n-butyl-benzenesulfonamide	control	2018	August	1	0.663128	1_c	0.08
0.243	C5H11NO	nitro	1-(dimethylamino)-2-propanone	control	2018	June	19	1.93106	19_c	0.09
0.967	C7H5N	nitro	benzonitrile	control	2018	June	12	0.551972	12_c	0.15
2.281	C10H15NO2S	nitro	n-butyl-benzenesulfonamide	control	2018	June	19	0.850493	19_c	0.16
2.281	C10H15NO2S	nitro	n-butyl-benzenesulfonamide	control	2018	October	12	0.585606	12_c	0.22
0.967	C7H5N	nitro	benzonitrile	control	2018	June	19	0.700889	19_c	0.3
2.281	C10H15NO2S	nitro	n-butyl-benzenesulfonamide	control	2018	August	19	0.965488	19_c	0.39
0.243	C5H11NO	nitro	1-(dimethylamino)-2-propanone	control	2018	June	1	2.34121	1_c	0.63
2.281	C10H15NO2S	nitro	n-butyl-benzenesulfonamide	control	2018	October	19	1.16156	19_c	0.85
0.967	C7H5N	nitro	benzonitrile	control	2018	June	1	1.39212	1_c	1.12
0.243	C5H11NO	nitro	1-(dimethylamino)-2-propanone	control	2018	June	12	2.80424	12_c	1.13
2.281	C10H15NO2S	nitro	n-butyl-benzenesulfonamide	control	2018	June	12	1.70575	12_c	1.15
2.281	C10H15NO2S	nitro	n-butyl-benzenesulfonamide	control	2018	October	1	1.52771	1_c	1.31
1.037	C7H9N	nitro	4-cyanocyclohexene	control	2018	August	1	1.95418	1_c	2.07
1.139	C8H8O	oBz	4-methyl-benzaldehyde	control	2018	August	1	0.737333	1_c	0.01
1.362	C10H14O	oBz	a,a,4-trimethyl-benzenemethanol	control	2018	August	19	0.0275434	19_c	0.01
1.22	C9H12O2	oBz	benzaldehyde dimethyl acetal	control	2018	August	1	0.0463338	1_c	0.01
1.386	C8H8O3	oBz	methyl salicylate	control	2018	June	19	0.0478067	19_c	0.01
1.362	C10H14O	oBz	a,a,4-trimethyl-benzenemethanol	control	2018	October	1	0.0137965	1_c	0.01
1.22	C9H12O2	oBz	benzaldehyde dimethyl acetal	control	2018	October	12	0.0342986	12_c	0.01
1.362	C10H14O	oBz	a,a,4-trimethyl-benzenemethanol	control	2018	October	19	0.0182905	19_c	0.01
1.22	C9H12O2	oBz	benzaldehyde dimethyl acetal	control	2018	October	1	0.0353594	1_c	0.01
1.482	C10H12O2	oBz	thymoquinone	control	2018	October	19	0.0291033	19_c	0.01
1.482	C10H12O2	oBz	thymoquinone	control	2018	August	19	0.0374169	19_c	0.02
1.764		oBz	obz	control	2018	June	19	0.14443	19_c	0.02
1.062	C7H8O	oBz	benzyl alcohol	control	2018	June	1	0.456592	1_c	0.02
1.764		oBz	obz	control	2018	June	1	0.142848	1_c	0.02
1.424	C8H10O2	oBz	2-phenoxy-ethanol	control	2018	October	12	0.114043	12_c	0.02
1.482	C10H12O2	oBz	thymoquinone	control	2018	October	1	0.0356371	1_c	0.02
1.22	C9H12O2	oBz	benzaldehyde dimethyl acetal	control	2018	October	19	0.0471772	19_c	0.02
1.22	C9H12O2	oBz	benzaldehyde dimethyl acetal	control	2018	August	19	0.0655625	19_c	0.03
1.869		oBz	obz	control	2018	June	1	0.751734	1_c	0.03
1.168	C9H12O	oBz	a,a-dimethyl-benzenemethanol	control	2018	October	1	0.0938033	1_c	0.03
1.168	C9H12O	oBz	a,a-dimethyl-benzenemethanol	control	2018	August	1	0.129153	1_c	0.04
1.168	C9H12O	oBz	a,a-dimethyl-benzenemethanol	control	2018	October	12	0.0964126	12_c	0.04
1.168	C9H12O	oBz	a,a-dimethyl-benzenemethanol	control	2018	October	19	0.108598	19_c	0.05
1.424	C8H10O2	oBz	2-phenoxy-ethanol	control	2018	August	19	0.495691	19_c	0.07
1.168	C9H12O	oBz	a,a-dimethyl-benzenemethanol	control	2018	August	19	0.174868	19_c	0.09
1.386	C8H8O3	oBz	methyl salicylate	control	2018	June	12	0.113551	12_c	0.09
1.604	C8H6O4	oBz	1,2-benzenedicarboxylic acid	control	2018	October	12	0.333452	12_c	0.09
1.424	C8H10O2	oBz	2-phenoxy-ethanol	control	2018	August	1	0.4983	1_c	0.1
1.168	C9H12O	oBz	a,a-dimethyl-benzenemethanol	control	2018	June	1	0.229052	1_c	0.12
1.139	C8H8O	oBz	4-methyl-benzaldehyde	control	2018	October	19	0.652105	19_c	0.12
1.424	C8H10O2	oBz	2-phenoxy-ethanol	control	2018	October	19	0.25725	19_c	0.18
1.604	C8H6O4	oBz	1,2-benzenedicarboxylic acid	control	2018	August	12	0.504832	12_c	0.19
1.482	C10H12O2	oBz	thymoquinone	control	2018	August	1	0.190137	1_c	0.19
1.424	C8H10O2	oBz	2-phenoxy-ethanol	control	2018	June	1	1.36059	1_c	0.19
1.139	C8H8O	oBz	4-methyl-benzaldehyde	control	2018	October	12	0.713257	12_c	0.21
1.424	C8H10O2	oBz	2-phenoxy-ethanol	control	2018	October	1	0.321036	1_c	0.26
1.604	C8H6O4	oBz	1,2-benzenedicarboxylic acid	control	2018	June	1	1.05775	1_c	0.32
1.764		oBz	obz	control	2018	June	12	0.41211	12_c	0.32
0.94	C6H6O	oBz	phenol	control	2018	October	12	1.42476	12_c	0.33
2.704	C24H38O4	oBz	diisooctyl phthalate	control	2018	October	1	9.00078	1_c	0.41
1.953	C10H6O3	oBz	phenylmaleic anhydride	control	2018	June	1	1.4386	1_c	0.42
1.062	C7H8O	oBz	benzyl alcohol	control	2018	June	12	0.830217	12_c	0.44
1.604	C8H6O4	oBz	1,2-benzenedicarboxylic acid	control	2018	October	1	0.643818	1_c	0.45
1.604	C8H6O4	oBz	1,2-benzenedicarboxylic acid	control	2018	August	19	0.916035	19_c	0.63
0.94	C6H6O	oBz	phenol	control	2018	June	19	3.94762	19_c	0.69
1.604	C8H6O4	oBz	1,2-benzenedicarboxylic acid	control	2018	June	19	1.4369	19_c	0.7
1.604	C8H6O4	oBz	1,2-benzenedicarboxylic acid	control	2018	October	19	0.91103	19_c	0.73
1.139	C8H8O	oBz	4-methyl-benzaldehyde	control	2018	August	19	1.4355	19_c	0.75
1.365	C9H10O	oBz	1-(3-methylphenyl)-ethanone	control	2018	June	12	0.921867	12_c	0.76
1.604	C8H6O4	oBz	1,2-benzenedicarboxylic acid	control	2018	August	1	1.12584	1_c	0.91
0.94	C6H6O	oBz	phenol	control	2018	October	19	2.10805	19_c	1.05
1.386	C8H8O3	oBz	methyl salicylate	control	2018	June	1	0.965142	1_c	1.07
0.94	C6H6O	oBz	phenol	control	2018	October	1	2.09466	1_c	1.12
1.953	C10H6O3	oBz	phenylmaleic anhydride	control	2018	June	19	2.1465	19_c	1.15
1.133	C8H8O	oBz	acetophenone	control	2018	October	1	3.11126	1_c	1.26
1.133	C8H8O	oBz	acetophenone	control	2018	October	19	3.27619	19_c	1.33
1.133	C8H8O	oBz	acetophenone	control	2018	August	1	4.48612	1_c	1.47
0.94	C6H6O	oBz	phenol	control	2018	August	1	2.6721	1_c	1.49
0.94	C6H6O	oBz	phenol	control	2018	June	1	4.51923	1_c	1.5
1.133	C8H8O	oBz	acetophenone	control	2018	October	12	3.42456	12_c	1.59
1.604	C8H6O4	oBz	1,2-benzenedicarboxylic acid	control	2018	June	12	2.60173	12_c	2.06
1.424	C8H10O2	oBz	2-phenoxy-ethanol	control	2018	June	12	3.66604	12_c	2.79
0.94	C6H6O	oBz	phenol	control	2018	August	19	3.94796	19_c	2.8
0.919	C7H6O	oBz	benzaldehyde	control	2018	October	1	12.5953	1_c	3.07
1.133	C8H8O	oBz	acetophenone	control	2018	August	19	6.15578	19_c	3.15
1.133	C8H8O	oBz	acetophenone	control	2018	June	1	15.141	1_c	3.72
1.953	C10H6O3	oBz	phenylmaleic anhydride	control	2018	June	12	4.67249	12_c	4.08
1.375	C11H16O	oBz	obz	control	2018	June	12	4.91633	12_c	4.29
0.919	C7H6O	oBz	benzaldehyde	control	2018	June	19	49.1341	19_c	4.8
0.919	C7H6O	oBz	benzaldehyde	control	2018	October	19	14.8448	19_c	5.09
1.133	C8H8O	oBz	acetophenone	control	2018	June	12	16.8688	12_c	5.53
1.139	C8H8O	oBz	4-methyl-benzaldehyde	control	2018	June	12	14.554	12_c	5.62
0.919	C7H6O	oBz	benzaldehyde	control	2018	October	12	15.2916	12_c	6
0.94	C6H6O	oBz	phenol	control	2018	June	12	8.66209	12_c	6.15
2.704	C24H38O4	oBz	diisooctyl phthalate	control	2018	August	19	6.28255	19_c	6.63
0.919	C7H6O	oBz	benzaldehyde	control	2018	August	1	19.056	1_c	8.86
2.704	C24H38O4	oBz	diisooctyl phthalate	control	2018	August	12	10.0114	12_c	11.04
0.919	C7H6O	oBz	benzaldehyde	control	2018	June	12	58.672	12_c	16.95
0.919	C7H6O	oBz	benzaldehyde	control	2018	August	19	27.8347	19_c	17.88
0.919	C7H6O	oBz	benzaldehyde	control	2018	June	1	67.1569	1_c	27.31
1.635		oMT	omt	control	2018	August	19	0.00575594	19_c	0.01
1.623		oMT	omt	control	2018	August	1	0.0216028	1_c	0.01
1.623		oMT	omt	control	2018	June	12	0.00653602	12_c	0.01
1.599	C10H16O	oMT	omt	control	2018	June	19	0.025736	19_c	0.01
1.215	C10H16O	oMT	omt	control	2018	June	1	0.051668	1_c	0.01
1.215	C10H16O	oMT	b-thujone	control	2018	October	19	0.0072224	19_c	0.01
1.623		oMT	omt	control	2018	October	1	0.0146871	1_c	0.01
1.623		oMT	omt	control	2018	October	19	0.0176322	19_c	0.01
1.19	C10H18O	oMT	linalool	control	2018	October	12	0.0601305	12_c	0.01
1.599	C10H16O	oMT	omt	control	2018	August	1	0.026247	1_c	0.02
1.623		oMT	omt	control	2018	August	19	0.0303941	19_c	0.02
1.067	C10H18O	oMT	eucalyptol	control	2018	June	1	0.170608	1_c	0.02
1.132		oMT	omt	control	2018	June	19	0.434555	19_c	0.02
1.599	C10H16O	oMT	omt	control	2018	October	19	0.0221187	19_c	0.02
1.599	C10H16O	oMT	omt	control	2018	October	1	0.0217716	1_c	0.02
1.19	C10H18O	oMT	linalool	control	2018	August	1	0.11702	1_c	0.03
1.34	C10H20O	oMT	levomenthol	control	2018	June	19	0.276029	19_c	0.03
1.067	C10H18O	oMT	eucalyptol	control	2018	October	12	0.105457	12_c	0.03
1.19	C10H18O	oMT	linalool	control	2018	October	1	0.074829	1_c	0.03
1.067	C10H18O	oMT	eucalyptol	control	2018	October	1	0.106968	1_c	0.03
1.599	C10H16O	oMT	omt	control	2018	August	19	0.0456514	19_c	0.04
1.067	C10H18O	oMT	eucalyptol	control	2018	August	19	0.188085	19_c	0.04
1.599	C10H16O	oMT	omt	control	2018	June	12	0.0493366	12_c	0.04
1.48		oMT	omt	control	2018	June	12	0.043975	12_c	0.04
1.19	C10H18O	oMT	linalool	control	2018	June	19	0.133064	19_c	0.04
1.19	C10H18O	oMT	linalool	control	2018	October	19	0.0867355	19_c	0.04
1.215	C10H16O	oMT	omt	control	2018	June	12	0.0818759	12_c	0.05
1.34	C10H20O	oMT	levomenthol	control	2018	June	1	0.296064	1_c	0.06
1.067	C10H18O	oMT	eucalyptol	control	2018	October	19	0.14506	19_c	0.07
1.19	C10H18O	oMT	linalool	control	2018	June	1	0.175637	1_c	0.1
1.132		oMT	omt	control	2018	June	1	0.497131	1_c	0.11
1.19	C10H18O	oMT	linalool	control	2018	August	19	0.207015	19_c	0.13
1.067	C10H18O	oMT	eucalyptol	control	2018	June	12	0.318637	12_c	0.19
2.049	C15H24O	oST	caryophyllene oxide	control	2018	August	12	0.0479445	12_c	0.01
2.049	C15H24O	oST	caryophyllene oxide	control	2018	June	12	0.00976388	12_c	0.01
2.117	C15H24O	oST	ost	control	2018	October	12	0.0225028	12_c	0.01
2.117	C15H24O	oST	ost	control	2018	October	19	0.0256543	19_c	0.01
2.049	C15H24O	oST	caryophyllene oxide	control	2018	August	19	0.0548981	19_c	0.02
2.148	C15H24O	oST	ost	control	2018	August	19	0.102861	19_c	0.02
2.165	C15H24O	oST	ost	control	2018	June	12	0.113403	12_c	0.02
1.986	C15H26O	oST	nerolidol	control	2018	October	12	0.123772	12_c	0.02
2.049	C15H24O	oST	caryophyllene oxide	control	2018	June	19	0.0238553	19_c	0.03
2.165	C15H24O	oST	ost	control	2018	June	19	0.122378	19_c	0.03
2.049	C15H24O	oST	caryophyllene oxide	control	2018	October	19	0.0357808	19_c	0.03
2.117	C15H24O	oST	ost	control	2018	August	19	0.0673377	19_c	0.04
2.118	C15H24O	oST	ost	control	2018	June	12	0.0831807	12_c	0.04
2.148	C15H24O	oST	ost	control	2018	June	12	0.0933469	12_c	0.04
2.049	C15H24O	oST	caryophyllene oxide	control	2018	June	1	0.0364197	1_c	0.04
2.117	C15H24O	oST	ost	control	2018	October	1	0.0465066	1_c	0.04
2.087	C15H24O	oST	ost	control	2018	October	12	0.147382	12_c	0.04
2.148	C15H24O	oST	ost	control	2018	October	19	0.0737092	19_c	0.04
2.087	C15H24O	oST	ost	control	2018	August	1	0.151167	1_c	0.06
1.986	C15H26O	oST	nerolidol	control	2018	August	1	0.227514	1_c	0.06
2.165	C15H24O	oST	ost	control	2018	October	12	0.150211	12_c	0.06
2.087	C15H24O	oST	ost	control	2018	August	12	0.157669	12_c	0.07
2.049	C15H24O	oST	caryophyllene oxide	control	2018	October	1	0.0695255	1_c	0.07
2.148	C15H24O	oST	ost	control	2018	October	1	0.102848	1_c	0.08
2.165	C15H24O	oST	ost	control	2018	October	19	0.176435	19_c	0.09
2.165	C15H24O	oST	ost	control	2018	August	1	0.152208	1_c	0.12
1.986	C15H26O	oST	nerolidol	control	2018	June	12	0.536075	12_c	0.14
1.986	C15H26O	oST	nerolidol	control	2018	October	19	0.231545	19_c	0.14
1.986	C15H26O	oST	nerolidol	control	2018	August	19	0.318969	19_c	0.16
2.087	C15H24O	oST	ost	control	2018	October	19	0.259378	19_c	0.16
2.087	C15H24O	oST	ost	control	2018	October	1	0.275016	1_c	0.19
2.087	C15H24O	oST	ost	control	2018	August	19	0.281534	19_c	0.2
1.986	C15H26O	oST	nerolidol	control	2018	October	1	0.283786	1_c	0.21
2.165	C15H24O	oST	ost	control	2018	October	1	0.361576	1_c	0.31
2.165	C15H24O	oST	ost	control	2018	August	19	0.353368	19_c	0.34
1.277		other	ovoc	control	2018	August	19	0.00720201	19_c	0.01
2.039	C16H30O4	other	pentanoic acid, 2,2,4-trimethyl-3-carboxyisopropyl, isobutyl ester	control	2018	August	12	0.0177272	12_c	0.01
1.424		other	other	control	2018	October	19	0.0258879	19_c	0.01
1.424		other	other	control	2018	August	1	0.0303358	1_c	0.02
1.424		other	other	control	2018	August	19	0.0354858	19_c	0.03
2.039	C16H30O4	other	pentanoic acid, 2,2,4-trimethyl-3-carboxyisopropyl, isobutyl ester	control	2018	August	1	0.0388018	1_c	0.03
2.039	C16H30O4	other	pentanoic acid, 2,2,4-trimethyl-3-carboxyisopropyl, isobutyl ester	control	2018	August	19	0.0529187	19_c	0.05
2.039	C16H30O4	other	pentanoic acid, 2,2,4-trimethyl-3-carboxyisopropyl, isobutyl ester	control	2018	October	1	0.0720436	1_c	0.05
1.424		other	other	control	2018	October	1	0.0560908	1_c	0.05
0.403		other	other	control	2018	October	12	0.420963	12_c	0.06
0.403		other	other	control	2018	October	19	0.454097	19_c	0.09
1.044		other	other	control	2018	October	12	0.533472	12_c	0.11
0.403		other	other	control	2018	August	1	0.402865	1_c	0.15
1.044		other	other	control	2018	August	1	0.8999	1_c	0.17
1.038	C7H5NO	other	benzoxazole	control	2018	August	19	0.28822	19_c	0.21
0.403		other	other	control	2018	August	19	0.482823	19_c	0.22
0.44	C8H16	other	2,4,4-trimethyl-1-pentene	control	2018	June	19	0.460221	19_c	0.22
0.44	C8H16	other	2,4,4-trimethyl-1-pentene	control	2018	June	12	0.512075	12_c	0.29
1.278		other	ovoc	control	2018	June	19	1.53602	19_c	0.34
1.044		other	other	control	2018	August	19	1.15651	19_c	0.42
0.44	C8H16	other	2,4,4-trimethyl-1-pentene	control	2018	June	1	0.660153	1_c	0.47
1.044		other	other	control	2018	October	19	0.872673	19_c	0.47
1.044		other	other	control	2018	October	1	0.847087	1_c	0.47
1.277		other	ovoc	control	2018	June	19	2.08459	19_c	0.54
0.44	C8H16	other	2,4,4-trimethyl-1-pentene	control	2018	October	1	1.4571	1_c	0.54
0.44	C8H16	other	2,4,4-trimethyl-1-pentene	control	2018	October	12	1.9785	12_c	1.11
1.278		other	ovoc	control	2018	June	1	2.45275	1_c	1.45
1.277		other	ovoc	control	2018	June	1	2.84353	1_c	1.49
0.44	C8H16	other	2,4,4-trimethyl-1-pentene	control	2018	October	19	3.49689	19_c	2.74
1.681		ovoc	ovoc	control	2018	August	19	0.0090347	19_c	0.01
1.565		ovoc	ovoc	control	2018	August	19	0.00808326	19_c	0.01
0.628	C7H14O	ovoc	1-methoxy-2-hexene	control	2018	August	1	0.0051934	1_c	0.01
1.023	C9H18O	ovoc	methoxy-cyclooctane	control	2018	August	19	0.0103609	19_c	0.01
0.905		ovoc	ovoc	control	2018	August	19	0.0145552	19_c	0.01
0.943		ovoc	ovoc	control	2018	June	19	0.0301301	19_c	0.01
1.511		ovoc	ovoc	control	2018	June	19	0.0424656	19_c	0.01
0.905		ovoc	ovoc	control	2018	October	19	0.00468781	19_c	0.01
1.681		ovoc	ovoc	control	2018	October	1	0.00479271	1_c	0.01
0.516	C6H14O2	ovoc	2,2-dimethoxybutane	control	2018	October	1	0.00793721	1_c	0.01
1.565		ovoc	ovoc	control	2018	October	19	0.00791675	19_c	0.01
1.681		ovoc	ovoc	control	2018	October	19	0.00620001	19_c	0.01
0.628	C7H14O	ovoc	1-methoxy-2-hexene	control	2018	October	1	0.00825658	1_c	0.01
0.943		ovoc	ovoc	control	2018	October	12	0.0290597	12_c	0.01
1.079	C9H18O	ovoc	ovoc	control	2018	October	1	0.010396	1_c	0.01
0.943		ovoc	ovoc	control	2018	October	1	0.0314674	1_c	0.01
1.079	C9H18O	ovoc	ovoc	control	2018	October	19	0.0123696	19_c	0.01
1.023	C9H18O	ovoc	methoxy-cyclooctane	control	2018	October	19	0.0152573	19_c	0.01
1.079	C9H18O	ovoc	ovoc	control	2018	August	1	0.0184512	1_c	0.02
0.943		ovoc	ovoc	control	2018	August	1	0.0418844	1_c	0.02
1.079	C9H18O	ovoc	ovoc	control	2018	August	19	0.0234372	19_c	0.02
2.12		ovoc	ovoc	control	2018	June	19	0.450953	19_c	0.02
0.797	C6H14O2	ovoc	2-butoxy ethanol	control	2018	June	19	0.204611	19_c	0.02
0.943		ovoc	ovoc	control	2018	June	1	0.0402758	1_c	0.02
0.797	C6H14O2	ovoc	2-butoxy ethanol	control	2018	June	1	0.203394	1_c	0.03
0.943		ovoc	ovoc	control	2018	October	19	0.0455742	19_c	0.03
2.526		ovoc	ovoc	control	2018	October	1	0.12728	1_c	0.03
0.943		ovoc	ovoc	control	2018	August	19	0.0695121	19_c	0.04
1.664		ovoc	ovoc	control	2018	June	19	0.128224	19_c	0.04
1.511		ovoc	ovoc	control	2018	June	12	0.066334	12_c	0.04
0.943		ovoc	ovoc	control	2018	June	12	0.0689538	12_c	0.05
0.396	C4H8O2	ovoc	1,3-dioxane	control	2018	October	12	0.6288	12_c	0.05
0.656		ovoc	ovoc	control	2018	June	1	0.540809	1_c	0.06
0.396	C4H8O2	ovoc	1,3-dioxane	control	2018	June	12	0.124004	12_c	0.09
0.574		ovoc	ovoc	control	2018	June	1	0.540845	1_c	0.1
0.574		ovoc	ovoc	control	2018	June	12	0.567161	12_c	0.13
2.545		ovoc	ovoc	control	2018	August	1	1.28022	1_c	0.18
0.898	C6H12O	ovoc	ovoc	control	2018	August	1	0.89518	1_c	0.2
0.435	C5H10O3	ovoc	1,3,6-trioxocane	control	2018	October	12	0.738609	12_c	0.2
2.526		ovoc	ovoc	control	2018	August	19	0.27364	19_c	0.23
2.12		ovoc	ovoc	control	2018	June	12	0.624348	12_c	0.23
0.574		ovoc	ovoc	control	2018	August	19	1.89033	19_c	0.24
2.545		ovoc	ovoc	control	2018	August	12	1.36878	12_c	0.26
0.574		ovoc	ovoc	control	2018	October	12	1.18678	12_c	0.26
0.574		ovoc	ovoc	control	2018	October	1	1.22445	1_c	0.31
0.435	C5H10O3	ovoc	1,3,6-trioxocane	control	2018	October	1	0.846903	1_c	0.33
0.898	C6H12O	ovoc	ovoc	control	2018	October	12	0.760265	12_c	0.34
0.435	C5H10O3	ovoc	1,3,6-trioxocane	control	2018	August	1	1.1723	1_c	0.38
0.898	C6H12O	ovoc	ovoc	control	2018	October	1	0.822531	1_c	0.42
2.526		ovoc	ovoc	control	2018	October	19	0.486706	19_c	0.42
0.574		ovoc	ovoc	control	2018	August	12	2.04243	12_c	0.47
0.797	C6H14O2	ovoc	2-butoxy ethanol	control	2018	June	12	0.613967	12_c	0.49
0.396	C4H8O2	ovoc	1,3-dioxane	control	2018	August	1	1.58747	1_c	0.5
2.526		ovoc	ovoc	control	2018	October	12	0.546209	12_c	0.5
0.656		ovoc	ovoc	control	2018	June	12	1.041	12_c	0.62
0.435	C5H10O3	ovoc	1,3,6-trioxocane	control	2018	August	12	1.45606	12_c	0.69
0.396	C4H8O2	ovoc	1,3-dioxane	control	2018	October	19	1.22059	19_c	0.69
0.898	C6H12O	ovoc	ovoc	control	2018	October	19	1.13966	19_c	0.74
0.435	C5H10O3	ovoc	1,3,6-trioxocane	control	2018	August	19	1.62512	19_c	0.84
0.898	C6H12O	ovoc	ovoc	control	2018	August	19	1.53736	19_c	0.87
0.396	C4H8O2	ovoc	1,3-dioxane	control	2018	August	12	2.00176	12_c	0.96
0.435	C5H10O3	ovoc	1,3,6-trioxocane	control	2018	October	19	1.80483	19_c	1.36
0.396	C4H8O2	ovoc	1,3-dioxane	control	2018	August	19	2.52097	19_c	1.48
2.545		ovoc	ovoc	control	2018	October	1	3.03902	1_c	2.05
2.545		ovoc	ovoc	control	2018	August	19	3.15631	19_c	2.21
2.545		ovoc	ovoc	control	2018	October	12	3.98155	12_c	3.09
2.545		ovoc	ovoc	control	2018	October	19	5.01744	19_c	4.13
1.898	C15H24	ST	a-farnesene	control	2018	June	12	0.00562362	12_c	0.01
1.792	C15H24	ST	b-caryophyllene	control	2018	June	19	0.0598553	19_c	0.01
2.07	C15H24O	ST	ost	control	2018	June	12	0.0123624	12_c	0.01
1.792	C15H24	ST	b-caryophyllene	control	2018	June	1	0.0630371	1_c	0.01
1.835	C15H22	ST	st	control	2018	October	12	0.0136522	12_c	0.01
1.94	C15H24	ST	a-bisabolene	control	2018	October	12	0.0511391	12_c	0.01
1.898	C15H24	ST	a-farnesene	control	2018	October	1	0.0121171	1_c	0.01
1.898	C15H24	ST	a-farnesene	control	2018	August	19	0.0262836	19_c	0.02
1.818	C15H24	ST	st	control	2018	June	19	0.0654584	19_c	0.02
1.835	C15H22	ST	st	control	2018	October	1	0.0221937	1_c	0.02
1.835	C15H22	ST	st	control	2018	October	19	0.0291056	19_c	0.02
1.846	C15H24	ST	a-humulene	control	2018	October	19	0.0516223	19_c	0.02
1.94	C15H24	ST	a-bisabolene	control	2018	August	1	0.0790043	1_c	0.03
1.823	C15H24	ST	aromandendrene	control	2018	June	19	0.160166	19_c	0.03
1.846	C15H24	ST	a-humulene	control	2018	June	12	0.0251087	12_c	0.03
1.846	C15H24	ST	a-humulene	control	2018	October	1	0.0528484	1_c	0.03
1.792	C15H24	ST	b-caryophyllene	control	2018	October	19	0.0504329	19_c	0.03
1.792	C15H24	ST	b-caryophyllene	control	2018	August	19	0.091423	19_c	0.04
1.792	C15H24	ST	b-caryophyllene	control	2018	June	12	0.0868632	12_c	0.04
1.792	C15H24	ST	b-caryophyllene	control	2018	October	1	0.0619741	1_c	0.04
1.818	C15H24	ST	st	control	2018	June	12	0.0908329	12_c	0.05
1.94	C15H24	ST	a-bisabolene	control	2018	October	19	0.087879	19_c	0.05
1.823	C15H24	ST	aromandendrene	control	2018	October	19	0.114742	19_c	0.07
1.94	C15H24	ST	a-bisabolene	control	2018	August	19	0.126139	19_c	0.08
1.823	C15H24	ST	aromandendrene	control	2018	October	1	0.122383	1_c	0.08
1.94	C15H24	ST	a-bisabolene	control	2018	October	1	0.114309	1_c	0.08
1.823	C15H24	ST	aromandendrene	control	2018	August	19	0.203693	19_c	0.1
1.835	C15H22	ST	st	control	2018	June	19	0.234794	19_c	0.11
1.823	C15H24	ST	aromandendrene	control	2018	June	12	0.285678	12_c	0.17
1.835	C15H22	ST	st	control	2018	June	12	0.390849	12_c	0.3
1.461	C7H11NS	sulfo	isothiocyanato-cyclohexane	control	2018	June	19	0.0155278	19_c	0.01
1.017	C8H18S	sulfo	sulfo	control	2018	June	12	0.181898	12_c	0.13
1.461	C7H11NS	sulfo	isothiocyanato-cyclohexane	control	2018	June	12	0.157947	12_c	0.17
0.77	C6H8O2	acid	sorbic acid	control	2019	October	1	0.0104135	1_c	0.01
0.944	C8H16O	alcohol	1-octen-3-ol	control	2019	August	19	0.439181	19_c	0.06
0.944	C8H16O	alcohol	1-octen-3-ol	control	2019	August	12	0.500044	12_c	0.17
0.995	C8H16O	aldehyde	octanal	control	2019	October	12	3.27093	12_c	0.02
0.691	C6H10O	aldehyde	trans-2-hexen-1-al	control	2019	October	1	0.195574	1_c	0.09
1.388	C10H20O	aldehyde	decanal	control	2019	October	12	1.89838	12_c	0.09
0.801	C7H14O	aldehyde	heptanal	control	2019	August	19	1.3716	19_c	0.1
0.691	C6H10O	aldehyde	trans-2-hexen-1-al	control	2019	October	12	0.264871	12_c	0.19
0.42	C5H10O	aldehyde	pentanal	control	2019	October	12	2.45876	12_c	0.28
0.995	C8H16O	aldehyde	octanal	control	2019	August	12	1.73518	12_c	0.64
1.198	C9H18O	aldehyde	nonanal	control	2019	October	12	4.91698	12_c	0.66
0.42	C5H10O	aldehyde	pentanal	control	2019	August	12	1.28934	12_c	0.69
0.801	C7H14O	aldehyde	heptanal	control	2019	August	12	1.84089	12_c	0.8
0.42	C5H10O	aldehyde	pentanal	control	2019	August	19	1.52919	19_c	0.84
0.587	C6H12O	aldehyde	hexanal	control	2019	August	19	2.6996	19_c	0.96
0.801	C7H14O	aldehyde	heptanal	control	2019	October	12	3.48167	12_c	0.99
0.587	C6H12O	aldehyde	hexanal	control	2019	August	12	2.82212	12_c	1.36
0.587	C6H12O	aldehyde	hexanal	control	2019	October	12	5.28906	12_c	1.39
1.198	C9H18O	aldehyde	nonanal	control	2019	August	12	4.63872	12_c	2.94
1.084		alkane	alkane	control	2019	October	19	0.0349087	19_c	0.01
0.587	C8H18	alkane	octane	control	2019	October	19	0.695573	19_c	0.01
0.773		alkane	alkane	control	2019	October	19	0.21965	19_c	0.01
0.818	C9H18	alkane	alkane	control	2019	October	12	0.0221758	12_c	0.01
0.389	C7H16	alkane	3-methyl-hexane	control	2019	August	12	0.157268	12_c	0.01
0.306	C6H14	alkane	hexane	control	2019	August	1	0.271433	1_c	0.01
0.728	C9H20	alkane	2-methyl-octane	control	2019	October	19	0.0784754	19_c	0.02
0.879	C10H22	alkane	3-ethyl-2-methyl-heptane	control	2019	August	1	0.745027	1_c	0.02
0.466	C7H14	alkane	methyl cyclohexane	control	2019	August	1	0.112297	1_c	0.02
0.389	C7H16	alkane	3-methyl-hexane	control	2019	August	19	0.181859	19_c	0.02
0.918	C10H20	alkane	alkane	control	2019	October	12	0.0573949	12_c	0.03
0.466	C7H14	alkane	methyl cyclohexane	control	2019	October	19	0.0769094	19_c	0.03
0.818	C9H18	alkane	alkane	control	2019	August	12	0.263931	12_c	0.03
0.389	C7H16	alkane	3-methyl-hexane	control	2019	August	1	0.184535	1_c	0.03
0.918	C10H20	alkane	alkane	control	2019	August	1	0.534741	1_c	0.03
0.406	C8H18	alkane	2,2,3,3-tetramethyl-butane	control	2019	August	19	0.593603	19_c	0.03
0.339	C6H12	alkane	methyl cyclopentane	control	2019	October	19	0.158451	19_c	0.04
0.421	C7H16	alkane	heptane	control	2019	October	12	0.560699	12_c	0.04
0.306	C6H14	alkane	hexane	control	2019	August	19	0.304532	19_c	0.04
0.773		alkane	alkane	control	2019	August	12	0.948416	12_c	0.04
0.728	C9H20	alkane	2-methyl-octane	control	2019	August	1	0.642033	1_c	0.04
0.567	C8H16	alkane	3-methylene-heptane	control	2019	October	19	0.168293	19_c	0.05
0.421	C7H16	alkane	heptane	control	2019	October	1	0.595575	1_c	0.05
0.911		alkane	alkane	control	2019	October	19	0.243855	19_c	0.05
0.818	C9H18	alkane	alkane	control	2019	August	1	0.297285	1_c	0.05
0.831	C10H22	alkane	3,4,5-trimethyl-heptane	control	2019	August	1	0.375341	1_c	0.05
0.466	C7H14	alkane	methyl cyclohexane	control	2019	August	19	0.143306	19_c	0.05
0.536	C8H18	alkane	2-methyl-heptane	control	2019	August	1	0.533148	1_c	0.06
0.918	C10H20	alkane	alkane	control	2019	August	19	0.572186	19_c	0.06
0.657		alkane	alkane	control	2019	August	19	0.651806	19_c	0.06
0.726	C9H20	alkane	4-methyl-octane	control	2019	August	19	0.672484	19_c	0.06
0.372	C6H12	alkane	cyclohexane	control	2019	August	19	0.707291	19_c	0.07
0.818	C9H18	alkane	alkane	control	2019	August	19	0.324994	19_c	0.07
0.796	C9H20	alkane	nonane	control	2019	October	12	0.340264	12_c	0.08
0.567	C8H16	alkane	3-methylene-heptane	control	2019	August	12	1.42829	12_c	0.08
0.657		alkane	alkane	control	2019	August	1	0.655544	1_c	0.08
0.728	C9H20	alkane	2-methyl-octane	control	2019	August	19	0.69377	19_c	0.08
0.831	C10H22	alkane	3,4,5-trimethyl-heptane	control	2019	August	19	0.426045	19_c	0.09
0.406	C8H18	alkane	2,2,3,3-tetramethyl-butane	control	2019	October	19	0.673217	19_c	0.11
1.648	C14H30	alkane	tetradecane	control	2019	October	19	0.381796	19_c	0.12
0.879	C10H22	alkane	3-ethyl-2-methyl-heptane	control	2019	August	19	0.852784	19_c	0.12
0.372	C6H12	alkane	cyclohexane	control	2019	August	1	0.739664	1_c	0.12
0.67	C9H20	alkane	2,5-dimethyl-heptane	control	2019	August	1	1.0899	1_c	0.12
0.536	C8H18	alkane	2-methyl-heptane	control	2019	August	19	0.605857	19_c	0.13
0.773		alkane	alkane	control	2019	August	1	1.08222	1_c	0.13
0.466	C7H14	alkane	methyl cyclohexane	control	2019	October	1	0.192441	1_c	0.16
0.406	C8H18	alkane	2,2,3,3-tetramethyl-butane	control	2019	August	12	0.654585	12_c	0.16
0.567	C8H16	alkane	3-methylene-heptane	control	2019	August	1	1.58412	1_c	0.16
0.406	C8H18	alkane	2,2,3,3-tetramethyl-butane	control	2019	October	12	0.672556	12_c	0.17
0.773		alkane	alkane	control	2019	October	12	0.338957	12_c	0.18
0.726	C9H20	alkane	4-methyl-octane	control	2019	August	1	0.755335	1_c	0.18
0.63	C9H20	alkane	2,4-dimethyl-heptane	control	2019	August	1	0.689776	1_c	0.18
0.988	C10H22	alkane	decane	control	2019	October	19	0.50025	19_c	0.19
0.988	C10H22	alkane	decane	control	2019	August	1	0.309368	1_c	0.19
0.587	C8H18	alkane	octane	control	2019	August	1	3.08834	1_c	0.19
0.911		alkane	alkane	control	2019	August	1	0.513725	1_c	0.19
0.306	C6H14	alkane	hexane	control	2019	August	12	0.438557	12_c	0.23
0.67	C9H20	alkane	2,5-dimethyl-heptane	control	2019	August	19	1.21078	19_c	0.23
0.283	C5H10	alkane	alkane	control	2019	October	12	0.950637	12_c	0.24
0.911		alkane	alkane	control	2019	August	12	0.519533	12_c	0.24
1.186	C11H24	alkane	undecane	control	2019	August	12	0.440029	12_c	0.24
0.773		alkane	alkane	control	2019	August	19	1.23083	19_c	0.27
0.421	C7H16	alkane	heptane	control	2019	October	19	0.82177	19_c	0.29
0.306	C6H14	alkane	hexane	control	2019	October	19	0.874517	19_c	0.29
1.552	C13H28	alkane	tridecane	control	2019	August	12	0.487307	12_c	0.29
1.186	C11H24	alkane	undecane	control	2019	October	12	0.968391	12_c	0.3
0.988	C10H22	alkane	decane	control	2019	October	12	0.55147	12_c	0.3
0.567	C8H16	alkane	3-methylene-heptane	control	2019	August	19	1.75015	19_c	0.31
1.093	C10H20	alkane	alkane	control	2019	August	12	0.271516	12_c	0.33
0.796	C9H20	alkane	nonane	control	2019	August	1	3.62122	1_c	0.34
0.911		alkane	alkane	control	2019	August	19	0.67718	19_c	0.36
0.988	C10H22	alkane	decane	control	2019	October	1	0.648183	1_c	0.37
0.283	C5H10	alkane	alkane	control	2019	October	19	1.14911	19_c	0.37
1.093	C10H20	alkane	alkane	control	2019	October	19	1.04607	19_c	0.38
0.818	C9H18	alkane	alkane	control	2019	October	1	0.371495	1_c	0.41
2.36		alkane	alkane	control	2019	October	19	0.987571	19_c	0.43
1.175	C13H28	alkane	alkane	control	2019	August	12	0.423725	12_c	0.44
0.306	C6H14	alkane	hexane	control	2019	October	12	0.942639	12_c	0.45
0.831	C10H22	alkane	3,4,5-trimethyl-heptane	control	2019	October	1	0.479792	1_c	0.47
0.587	C8H18	alkane	octane	control	2019	August	19	3.44255	19_c	0.5
0.63	C9H20	alkane	2,4-dimethyl-heptane	control	2019	October	1	0.800411	1_c	0.53
1.374	C12H26	alkane	dodecane	control	2019	August	12	0.729199	12_c	0.54
0.389	C7H16	alkane	3-methyl-hexane	control	2019	October	19	0.762897	19_c	0.55
1.374	C12H26	alkane	dodecane	control	2019	October	12	1.19911	12_c	0.55
1.175	C13H28	alkane	alkane	control	2019	October	12	1.04604	12_c	0.56
0.726	C9H20	alkane	4-methyl-octane	control	2019	October	1	0.856837	1_c	0.59
1.175	C13H28	alkane	alkane	control	2019	October	19	1.16013	19_c	0.59
0.911		alkane	alkane	control	2019	October	1	0.750644	1_c	0.64
0.796	C9H20	alkane	nonane	control	2019	August	19	3.99394	19_c	0.66
0.536	C8H18	alkane	2-methyl-heptane	control	2019	October	1	0.653857	1_c	0.71
0.918	C10H20	alkane	alkane	control	2019	October	1	0.660885	1_c	0.71
0.988	C10H22	alkane	decane	control	2019	August	19	0.787888	19_c	0.72
0.728	C9H20	alkane	2-methyl-octane	control	2019	October	1	0.799503	1_c	0.85
0.657		alkane	alkane	control	2019	October	1	0.799239	1_c	0.9
1.374	C12H26	alkane	dodecane	control	2019	October	19	1.75574	19_c	1.06
0.879	C10H22	alkane	3-ethyl-2-methyl-heptane	control	2019	October	1	0.940995	1_c	1.07
1.552	C13H28	alkane	tridecane	control	2019	October	19	2.18052	19_c	1.14
1.186	C11H24	alkane	undecane	control	2019	October	19	1.83884	19_c	1.18
0.773		alkane	alkane	control	2019	October	1	1.31007	1_c	1.27
1.648	C14H30	alkane	tetradecane	control	2019	August	12	1.33879	12_c	1.29
1.648	C14H30	alkane	tetradecane	control	2019	October	12	1.3384	12_c	1.31
0.988	C10H22	alkane	decane	control	2019	August	12	1.3115	12_c	1.42
0.67	C9H20	alkane	2,5-dimethyl-heptane	control	2019	October	1	1.4039	1_c	1.59
0.372	C6H12	alkane	cyclohexane	control	2019	October	19	7.65355	19_c	1.7
0.567	C8H16	alkane	3-methylene-heptane	control	2019	October	1	2.00611	1_c	2.16
0.587	C8H18	alkane	octane	control	2019	October	1	3.59443	1_c	3.35
0.796	C9H20	alkane	nonane	control	2019	October	1	4.34544	1_c	4.65
0.68	C9H18	alkene	1,1,3-trimethyl-cyclohexane	control	2019	October	12	0.0157451	12_c	0.01
0.68	C9H18	alkene	1,1,3-trimethyl-cyclohexane	control	2019	October	19	0.01768	19_c	0.01
0.779	C9H18	alkene	1-ethyl-4-methylcyclohexane	control	2019	October	19	0.0254806	19_c	0.02
0.708	C9H18	alkene	1,2,4-trimethyl-cyclohexane	control	2019	August	12	0.471164	12_c	0.02
0.636	C8H14	alkene	1,3-octadiene	control	2019	August	12	0.165943	12_c	0.03
0.471	C8H16	alkene	3,4,4-trimethyl-2-pentene	control	2019	October	12	0.21108	12_c	0.06
0.708	C9H18	alkene	1,2,4-trimethyl-cyclohexane	control	2019	August	1	0.542438	1_c	0.07
0.766	C9H18	alkene	1-nonene	control	2019	October	12	0.851885	12_c	0.08
0.708	C9H18	alkene	1,2,4-trimethyl-cyclohexane	control	2019	August	19	0.577252	19_c	0.09
0.68	C9H18	alkene	1,1,3-trimethyl-cyclohexane	control	2019	August	1	0.762787	1_c	0.1
0.471	C8H16	alkene	3,4,4-trimethyl-2-pentene	control	2019	August	12	0.250749	12_c	0.11
0.779	C9H18	alkene	1-ethyl-4-methylcyclohexane	control	2019	August	1	1.02057	1_c	0.12
0.68	C9H18	alkene	1,1,3-trimethyl-cyclohexane	control	2019	August	19	0.82943	19_c	0.16
0.779	C9H18	alkene	1-ethyl-4-methylcyclohexane	control	2019	August	19	1.10209	19_c	0.19
0.471	C8H16	alkene	3,4,4-trimethyl-2-pentene	control	2019	October	19	0.353087	19_c	0.2
0.708	C9H18	alkene	1,2,4-trimethyl-cyclohexane	control	2019	October	1	0.663667	1_c	0.76
0.68	C9H18	alkene	1,1,3-trimethyl-cyclohexane	control	2019	October	1	0.942328	1_c	1.07
0.636	C8H14	alkene	1,3-octadiene	control	2019	August	19	1.27083	19_c	1.25
0.779	C9H18	alkene	1-ethyl-4-methylcyclohexane	control	2019	October	1	1.25861	1_c	1.44
0.715	C8H10	Bz	ethylbenzene	control	2019	October	1	0.18245	1_c	0.01
0.781	C8H10	Bz	o-xylene	control	2019	August	19	0.210312	19_c	0.01
0.781	C8H10	Bz	o-xylene	control	2019	August	1	0.207498	1_c	0.01
0.775	C8H8	Bz	styrene	control	2019	August	1	0.380108	1_c	0.01
0.781	C8H10	Bz	o-xylene	control	2019	October	1	0.202856	1_c	0.02
0.962	C9H10	Bz	a-methylstyrene	control	2019	October	1	0.325744	1_c	0.02
0.732	C8H10	Bz	p-xylene	control	2019	August	1	0.675445	1_c	0.03
0.732	C8H10	Bz	p-xylene	control	2019	August	19	0.693775	19_c	0.03
0.377	C6H6	Bz	benzene	control	2019	August	1	0.98829	1_c	0.03
0.715	C8H10	Bz	ethylbenzene	control	2019	August	19	0.214407	19_c	0.06
0.775	C8H8	Bz	styrene	control	2019	August	19	0.440178	19_c	0.07
0.781	C8H10	Bz	o-xylene	control	2019	October	19	0.273476	19_c	0.1
1.162	C10H12	Bz	bz	control	2019	August	12	0.116291	12_c	0.1
0.781	C8H10	Bz	o-xylene	control	2019	August	12	0.282094	12_c	0.11
0.715	C8H10	Bz	ethylbenzene	control	2019	October	19	0.280368	19_c	0.12
0.377	C6H6	Bz	benzene	control	2019	October	1	0.994216	1_c	0.12
0.962	C9H10	Bz	a-methylstyrene	control	2019	October	19	0.421535	19_c	0.12
0.715	C8H10	Bz	ethylbenzene	control	2019	August	12	0.318893	12_c	0.21
0.377	C6H6	Bz	benzene	control	2019	August	19	1.16908	19_c	0.21
0.535	C7H8	Bz	toluene	control	2019	August	12	7.42306	12_c	0.22
0.962	C9H10	Bz	a-methylstyrene	control	2019	August	1	0.692615	1_c	0.22
0.781	C8H10	Bz	o-xylene	control	2019	October	12	0.464524	12_c	0.35
0.732	C8H10	Bz	p-xylene	control	2019	October	19	1.16563	19_c	0.48
0.535	C7H8	Bz	toluene	control	2019	October	19	1.26915	19_c	0.48
0.775	C8H8	Bz	styrene	control	2019	October	1	0.47618	1_c	0.51
0.715	C8H10	Bz	ethylbenzene	control	2019	October	12	0.600729	12_c	0.53
0.732	C8H10	Bz	p-xylene	control	2019	August	12	1.13485	12_c	0.63
0.535	C7H8	Bz	toluene	control	2019	October	12	1.40078	12_c	0.76
0.377	C6H6	Bz	benzene	control	2019	October	19	1.5953	19_c	0.77
0.962	C9H10	Bz	a-methylstyrene	control	2019	August	12	1.38936	12_c	1.11
0.377	C6H6	Bz	benzene	control	2019	August	12	2.01056	12_c	1.34
0.732	C8H10	Bz	p-xylene	control	2019	October	12	1.8017	12_c	1.36
0.535	C7H8	Bz	toluene	control	2019	August	1	8.89439	1_c	1.43
0.535	C7H8	Bz	toluene	control	2019	August	19	9.47036	19_c	1.84
0.377	C6H6	Bz	benzene	control	2019	October	12	2.52002	12_c	2.03
0.962	C9H10	Bz	a-methylstyrene	control	2019	August	19	2.50648	19_c	2.24
0.535	C7H8	Bz	toluene	control	2019	October	1	10.5912	1_c	11.21
0.402	C5H10O2	ester	methyl isobutyrate	control	2019	October	12	0.0232168	12_c	0.01
1	C8H14O2	ester	cis-3-hexenyl acetate	control	2019	October	12	0.155743	12_c	0.01
0.321	C4H8O2	ester	ethyl acetate	control	2019	August	12	0.0270095	12_c	0.01
0.547	C6H12O2	ester	butanoic acid, 2-methyl-, methyl ester	control	2019	August	12	0.00791197	12_c	0.01
0.402	C5H10O2	ester	methyl isobutyrate	control	2019	August	12	0.0353483	12_c	0.02
0.321	C4H8O2	ester	ethyl acetate	control	2019	October	12	0.0466637	12_c	0.03
0.402	C5H10O2	ester	methyl isobutyrate	control	2019	October	19	0.0470684	19_c	0.03
0.439	C5H8O2	ester	methyl methacrylate	control	2019	October	1	0.464107	1_c	0.07
0.439	C5H8O2	ester	methyl methacrylate	control	2019	October	19	0.517237	19_c	0.12
0.439	C5H8O2	ester	methyl methacrylate	control	2019	August	1	0.443828	1_c	0.14
0.439	C5H8O2	ester	methyl methacrylate	control	2019	August	19	0.480356	19_c	0.17
0.439	C5H8O2	ester	methyl methacrylate	control	2019	October	12	1.75356	12_c	1.66
0.439	C5H8O2	ester	methyl methacrylate	control	2019	August	12	2.12669	12_c	2.21
0.313	C5H6O	furan	2-methylfuran	control	2019	August	1	0.330859	1_c	0.01
0.353	C4H8O2	furan	2-methyl-1,3-dioxolane	control	2019	August	19	0.652806	19_c	0.01
0.313	C5H6O	furan	2-methylfuran	control	2019	October	12	0.361645	12_c	0.1
0.309	C5H6O	furan	furan	control	2019	October	19	0.212326	19_c	0.11
0.353	C4H8O2	furan	2-methyl-1,3-dioxolane	control	2019	October	19	0.358132	19_c	0.11
0.313	C5H6O	furan	2-methylfuran	control	2019	October	19	0.415635	19_c	0.13
0.353	C4H8O2	furan	2-methyl-1,3-dioxolane	control	2019	October	12	0.371693	12_c	0.16
0.309	C5H6O	furan	furan	control	2019	August	19	0.348118	19_c	0.18
0.653	C5H4O2	furan	2-furaldehyde	control	2019	October	12	0.487111	12_c	0.19
0.313	C5H6O	furan	2-methylfuran	control	2019	August	19	0.510444	19_c	0.21
0.309	C5H6O	furan	furan	control	2019	August	12	0.346862	12_c	0.21
0.653	C5H4O2	furan	2-furaldehyde	control	2019	August	12	0.853848	12_c	0.22
0.382	C5H8O	furan	2-ethylacrolein	control	2019	August	19	1.07031	19_c	0.22
0.382	C5H8O	furan	2-ethylacrolein	control	2019	August	1	1.16441	1_c	0.35
0.353	C4H8O2	furan	2-methyl-1,3-dioxolane	control	2019	October	1	0.580629	1_c	0.37
0.313	C5H6O	furan	2-methylfuran	control	2019	August	12	0.698727	12_c	0.48
0.382	C5H8O	furan	2-ethylacrolein	control	2019	October	12	3.77674	12_c	1.53
0.382	C5H8O	furan	2-ethylacrolein	control	2019	August	12	3.1777	12_c	2.87
0.382	C5H8O	furan	2-ethylacrolein	control	2019	October	19	6.2805	19_c	3.99
0.315	C6H3F3	halogen	1,2,4-trifluorobenzene	control	2019	August	1	1.04631	1_c	0.14
0.228	C5H8	isoprene	isoprene	control	2019	October	19	0.494881	19_c	0.14
0.366	C5H10O	ketone	3-methyl-2-butanone	control	2019	October	12	0.057323	12_c	0.01
0.305	C4H6O	ketone	2-butanone	control	2019	October	12	1.07712	12_c	0.01
0.418	C5H10O	ketone	3-pentanone	control	2019	August	1	0.100063	1_c	0.01
0.492	C6H12O	ketone	methyl isobutyl ketone	control	2019	October	19	0.19208	19_c	0.02
0.366	C5H10O	ketone	3-methyl-2-butanone	control	2019	August	19	0.0521333	19_c	0.02
0.366	C5H10O	ketone	3-methyl-2-butanone	control	2019	August	12	0.051667	12_c	0.02
0.366	C5H10O	ketone	3-methyl-2-butanone	control	2019	October	19	0.0932459	19_c	0.04
0.404	C5H10O	ketone	2-pentanone	control	2019	October	12	0.394532	12_c	0.05
0.962	C8H14O	ketone	6-methyl-5-hepten-2-one	control	2019	August	1	0.519614	1_c	0.05
0.297	C4H6O	ketone	methyl vinyl ketone	control	2019	August	19	0.806117	19_c	0.05
0.765	C7H14O	ketone	2-heptanone	control	2019	October	12	0.544988	12_c	0.07
0.962	C8H14O	ketone	6-methyl-5-hepten-2-one	control	2019	August	19	0.552975	19_c	0.07
0.765	C7H14O	ketone	2-heptanone	control	2019	August	12	0.326446	12_c	0.08
0.297	C4H6O	ketone	methyl vinyl ketone	control	2019	October	19	1.40424	19_c	0.1
0.297	C4H6O	ketone	methyl vinyl ketone	control	2019	August	1	0.852969	1_c	0.13
0.305	C4H6O	ketone	2-butanone	control	2019	August	12	0.99602	12_c	0.14
0.418	C5H10O	ketone	3-pentanone	control	2019	October	19	0.255947	19_c	0.15
0.305	C4H6O	ketone	2-butanone	control	2019	August	19	1.12044	19_c	0.19
0.492	C6H12O	ketone	methyl isobutyl ketone	control	2019	October	1	0.357888	1_c	0.21
0.962	C8H14O	ketone	6-methyl-5-hepten-2-one	control	2019	August	12	0.634835	12_c	0.22
0.297	C4H6O	ketone	methyl vinyl ketone	control	2019	October	12	1.41208	12_c	0.23
0.297	C4H6O	ketone	methyl vinyl ketone	control	2019	August	12	0.89151	12_c	0.23
0.305	C4H6O	ketone	2-butanone	control	2019	October	19	1.52349	19_c	0.41
0.404	C5H10O	ketone	2-pentanone	control	2019	October	19	0.803111	19_c	0.48
1.022	C10H16	MT	3-carene	control	2019	August	12	0.0191065	12_c	0.01
0.866	C10H16	MT	a-pinene	control	2019	August	19	0.0100705	19_c	0.01
0.958	C10H16	MT	b-pinene	control	2019	August	19	0.0417009	19_c	0.01
0.9	C10H16	MT	camphene	control	2019	October	19	1.26539	19_c	0.02
1.009	C10H16	MT	a-phellandrene	control	2019	August	12	0.0383221	12_c	0.02
0.958	C10H16	MT	b-pinene	control	2019	August	12	0.0526923	12_c	0.03
1.05	C10H14	MT	p-cymene	control	2019	October	1	0.0449511	1_c	0.04
1.117	C10H16	MT	y-terpinene	control	2019	August	12	0.100309	12_c	0.04
1.087	C10H16	MT	ocimene	control	2019	August	12	0.201323	12_c	0.05
1.059	C10H16	MT	d-limonene	control	2019	October	19	0.2814	19_c	0.06
1.087	C10H16	MT	ocimene	control	2019	August	1	0.222766	1_c	0.06
0.866	C10H16	MT	a-pinene	control	2019	October	12	0.144036	12_c	0.07
1.059	C10H16	MT	d-limonene	control	2019	August	12	0.170012	12_c	0.08
0.866	C10H16	MT	a-pinene	control	2019	August	12	0.0726154	12_c	0.08
1.05	C10H14	MT	p-cymene	control	2019	October	12	0.0877662	12_c	0.09
0.9	C10H16	MT	camphene	control	2019	August	1	0.935508	1_c	0.13
0.967	C7H5N	nitro	benzonitrile	control	2019	August	12	0.840974	12_c	0.05
1.507	C8H7N	nitro	indole	control	2019	August	1	0.111373	1_c	0.13
0.967	C7H5N	nitro	benzonitrile	control	2019	October	19	1.57599	19_c	0.52
2.159	C14H14O2	oBz	1,2-diphenoxyethane	control	2019	October	12	0.1629	12_c	0.01
1.168	C9H12O	oBz	a,a-dimethyl-benzenemethanol	control	2019	August	12	0.0217768	12_c	0.01
1.812	C14H22O	oBz	2,4-di-tert-butylphenol	control	2019	August	19	0.268373	19_c	0.01
1.062	C7H8O	oBz	benzyl alcohol	control	2019	October	19	0.108912	19_c	0.02
1.062	C7H8O	oBz	benzyl alcohol	control	2019	August	12	0.0740147	12_c	0.02
1.062	C7H8O	oBz	benzyl alcohol	control	2019	August	1	0.0967363	1_c	0.04
1.812	C14H22O	oBz	2,4-di-tert-butylphenol	control	2019	October	12	0.0975165	12_c	0.05
1.604	C8H6O4	oBz	1,2-benzenedicarboxylic acid	control	2019	August	19	0.428486	19_c	0.05
1.812	C14H22O	oBz	2,4-di-tert-butylphenol	control	2019	August	12	0.314523	12_c	0.09
1.139	C8H8O	oBz	4-methyl-benzaldehyde	control	2019	August	19	0.822723	19_c	0.1
1.812	C14H22O	oBz	2,4-di-tert-butylphenol	control	2019	October	1	0.164974	1_c	0.12
1.604	C8H6O4	oBz	1,2-benzenedicarboxylic acid	control	2019	October	12	0.397128	12_c	0.18
1.604	C8H6O4	oBz	1,2-benzenedicarboxylic acid	control	2019	August	1	0.55653	1_c	0.21
1.266	C7H6O2	oBz	benzoic acid	control	2019	August	12	0.572078	12_c	0.24
1.604	C8H6O4	oBz	1,2-benzenedicarboxylic acid	control	2019	October	1	0.541291	1_c	0.32
1.266	C7H6O2	oBz	benzoic acid	control	2019	August	19	0.692598	19_c	0.32
1.133	C8H8O	oBz	acetophenone	control	2019	August	1	2.76229	1_c	0.34
1.139	C8H8O	oBz	4-methyl-benzaldehyde	control	2019	August	12	1.26125	12_c	0.71
2.159	C14H14O2	oBz	1,2-diphenoxyethane	control	2019	October	1	0.948844	1_c	0.9
1.266	C7H6O2	oBz	benzoic acid	control	2019	August	1	1.24023	1_c	0.97
1.19	C10H18O	oMT	linalool	control	2019	August	12	0.158896	12_c	0.05
1.19	C10H18O	oMT	linalool	control	2019	October	12	0.355413	12_c	0.07
1.19	C10H18O	oMT	linalool	control	2019	October	19	0.424276	19_c	0.11
1.844	C15H26O	oST	ost	control	2019	August	19	0.129572	19_c	0.02
1.844	C15H26O	oST	ost	control	2019	October	19	0.224019	19_c	0.03
1.844	C15H26O	oST	ost	control	2019	October	1	0.249752	1_c	0.06
1.986	C15H26O	oST	nerolidol	control	2019	August	12	0.415062	12_c	0.09
1.986	C15H26O	oST	nerolidol	control	2019	October	19	1.81037	19_c	0.14
0.863		other	other	control	2019	October	19	0.0625694	19_c	0.01
0.863		other	other	control	2019	October	12	0.0693396	12_c	0.02
0.44	C8H16	other	2,4,4-trimethyl-1-pentene	control	2019	October	12	0.0560955	12_c	0.03
0.395		other	other	control	2019	October	1	0.118543	1_c	0.03
0.395		other	other	control	2019	August	1	0.162191	1_c	0.03
0.82		other	other	control	2019	August	19	0.252404	19_c	0.03
0.581		other	other	control	2019	August	19	0.189524	19_c	0.04
0.845		other	other	control	2019	August	1	0.661493	1_c	0.06
0.44	C8H16	other	2,4,4-trimethyl-1-pentene	control	2019	October	1	0.0917939	1_c	0.07
0.395		other	other	control	2019	October	19	0.194204	19_c	0.11
0.395		other	other	control	2019	October	12	0.185999	12_c	0.12
0.845		other	other	control	2019	August	19	0.742366	19_c	0.13
0.863		other	other	control	2019	August	1	1.11097	1_c	0.15
0.44		other	other	control	2019	August	12	0.758579	12_c	0.15
0.863		other	other	control	2019	August	19	1.23999	19_c	0.27
0.581		other	other	control	2019	August	12	0.374579	12_c	0.29
0.82		other	other	control	2019	October	1	0.296828	1_c	0.33
0.44		other	other	control	2019	October	19	0.925217	19_c	0.42
0.845		other	other	control	2019	October	1	0.825242	1_c	0.9
0.863		other	other	control	2019	October	1	1.38339	1_c	1.52
0.268	C4H6O	ovoc	vinyl ether	control	2019	August	19	0.334055	19_c	0.01
0.797	C7H12O	ovoc	ovoc	control	2019	October	1	0.0251882	1_c	0.02
0.797	C7H12O	ovoc	ovoc	control	2019	August	1	0.0494309	1_c	0.03
0.268	C4H6O	ovoc	vinyl ether	control	2019	October	12	0.255672	12_c	0.05
0.551		ovoc	ovoc	control	2019	October	19	0.353102	19_c	0.06
0.268	C4H6O	ovoc	vinyl ether	control	2019	August	12	0.356289	12_c	0.07
0.551		ovoc	ovoc	control	2019	August	1	1.67713	1_c	0.2
0.905		ovoc	ovoc	control	2019	August	12	1.73151	12_c	0.2
0.268	C4H6O	ovoc	vinyl ether	control	2019	October	19	0.506732	19_c	0.31
0.551		ovoc	ovoc	control	2019	August	19	1.8874	19_c	0.39
2.25		ovoc	ovoc	control	2019	August	12	5.31402	12_c	1.83
0.551		ovoc	ovoc	control	2019	October	1	2.03419	1_c	2
2.25		ovoc	ovoc	control	2019	October	19	10.1781	19_c	2.6
1.835	C15H22	ST	st	control	2019	October	12	0.00709234	12_c	0.01
1.779	C15H24	ST	st	control	2019	October	19	0.0173196	19_c	0.01
1.852	C15H24	ST	st	control	2019	October	19	0.0274984	19_c	0.01
1.846	C15H24	ST	a-humulene	control	2019	August	1	0.00771355	1_c	0.01
1.846	C15H24	ST	a-humulene	control	2019	August	12	0.00749308	12_c	0.01
1.856	C15H24	ST	trans-y-bisabolene	control	2019	August	19	14.8722	19_c	1.64
1.856	C15H24	ST	trans-y-bisabolene	control	2019	October	1	15.1816	1_c	2.71
1.856	C15H24	ST	trans-y-bisabolene	control	2019	August	1	27.6217	1_c	16.66
0.77	C6H8O2	acid	sorbic acid	nitrogen	2018	June	6	0.192894	6_n	0.09
0.696	C6H12O	alcohol	cis-3-hexen-1-ol	nitrogen	2018	June	6	0.00480934	6_n	0.01
2.344	C16H34O	alcohol	1-hexadecanol	nitrogen	2018	August	6	1.03521	6_n	0.58
0.944	C8H16O	alcohol	1-octen-3-ol	nitrogen	2018	June	6	0.848548	6_n	0.63
1.043	C8H18O	alcohol	2-ethyl-1-hexanol	nitrogen	2018	August	9	4.99486	9_n	0.96
2.344	C16H34O	alcohol	1-hexadecanol	nitrogen	2018	October	11	1.98564	11_n	1.63
2.344	C16H34O	alcohol	1-hexadecanol	nitrogen	2018	August	11	2.02402	11_n	1.72
2.344	C16H34O	alcohol	1-hexadecanol	nitrogen	2018	June	6	3.95772	6_n	1.72
2.344	C16H34O	alcohol	1-hexadecanol	nitrogen	2018	August	9	2.22725	9_n	2
2.344	C16H34O	alcohol	1-hexadecanol	nitrogen	2018	October	9	3.40621	9_n	3.31
1.043	C8H18O	alcohol	2-ethyl-1-hexanol	nitrogen	2018	August	11	7.43384	11_n	3.56
1.043	C8H18O	alcohol	2-ethyl-1-hexanol	nitrogen	2018	August	6	7.90204	6_n	3.87
1.043	C8H18O	alcohol	2-ethyl-1-hexanol	nitrogen	2018	October	6	8.18337	6_n	6.66
1.043	C8H18O	alcohol	2-ethyl-1-hexanol	nitrogen	2018	June	9	7.72269	9_n	6.84
2.344	C16H34O	alcohol	1-hexadecanol	nitrogen	2018	October	6	8.58558	6_n	8.79
1.043	C8H18O	alcohol	2-ethyl-1-hexanol	nitrogen	2018	October	11	10.1109	11_n	9.04
1.043	C8H18O	alcohol	2-ethyl-1-hexanol	nitrogen	2018	October	9	11.398	9_n	10.79
1.709	C12H22O	aldehyde	aldehyde	nitrogen	2018	August	11	0.0119913	11_n	0.01
1.709	C12H22O	aldehyde	aldehyde	nitrogen	2018	August	6	0.0134397	6_n	0.01
1.709	C12H22O	aldehyde	aldehyde	nitrogen	2018	August	9	0.0165355	9_n	0.01
1.709	C12H22O	aldehyde	aldehyde	nitrogen	2018	October	11	0.0236974	11_n	0.01
1.198	C9H18O	aldehyde	nonanal	nitrogen	2018	October	11	2.93416	11_n	0.03
1.709	C12H22O	aldehyde	aldehyde	nitrogen	2018	October	9	0.0448938	9_n	0.03
1.687	C12H22O	aldehyde	2-butyl-2-octenal	nitrogen	2018	October	6	0.0387169	6_n	0.04
1.709	C12H22O	aldehyde	aldehyde	nitrogen	2018	October	6	0.120051	6_n	0.11
1.687	C12H22O	aldehyde	2-butyl-2-octenal	nitrogen	2018	June	6	0.161905	6_n	0.12
1.687	C12H22O	aldehyde	2-butyl-2-octenal	nitrogen	2018	June	9	0.184938	9_n	0.15
1.388	C10H20O	aldehyde	decanal	nitrogen	2018	October	11	2.72142	11_n	0.35
1.57	C11H22O	aldehyde	undecanal	nitrogen	2018	August	11	0.546521	11_n	0.4
1.57	C11H22O	aldehyde	undecanal	nitrogen	2018	August	6	0.588405	6_n	0.43
1.57	C11H22O	aldehyde	undecanal	nitrogen	2018	August	9	0.571319	9_n	0.45
1.57	C11H22O	aldehyde	undecanal	nitrogen	2018	October	11	0.589976	11_n	0.45
0.995	C8H16O	aldehyde	octanal	nitrogen	2018	October	11	2.2089	11_n	0.5
1.198	C9H18O	aldehyde	nonanal	nitrogen	2018	October	9	3.28803	9_n	0.51
1.57	C11H22O	aldehyde	undecanal	nitrogen	2018	October	9	0.765637	9_n	0.67
1.388	C10H20O	aldehyde	decanal	nitrogen	2018	October	9	3.26248	9_n	1.04
1.57	C11H22O	aldehyde	undecanal	nitrogen	2018	October	6	1.20121	6_n	1.1
0.995	C8H16O	aldehyde	octanal	nitrogen	2018	August	6	2.62553	6_n	1.15
1.388	C10H20O	aldehyde	decanal	nitrogen	2018	August	6	2.8386	6_n	1.43
1.388	C10H20O	aldehyde	decanal	nitrogen	2018	August	11	2.83404	11_n	1.5
1.198	C9H18O	aldehyde	nonanal	nitrogen	2018	October	6	4.56623	6_n	1.73
0.995	C8H16O	aldehyde	octanal	nitrogen	2018	October	9	3.27735	9_n	1.78
0.995	C8H16O	aldehyde	octanal	nitrogen	2018	October	6	3.4518	6_n	1.8
0.691	C6H10O	aldehyde	trans-2-hexen-1-al	nitrogen	2018	June	9	4.78328	9_n	1.81
0.42	C6H12O	aldehyde	ovoc	nitrogen	2018	June	6	5.68893	6_n	2.27
0.995	C8H16O	aldehyde	octanal	nitrogen	2018	August	11	3.64184	11_n	2.36
0.995	C8H16O	aldehyde	octanal	nitrogen	2018	August	9	3.59901	9_n	2.41
0.587	C6H12O	aldehyde	hexanal	nitrogen	2018	October	11	3.13248	11_n	2.48
1.388	C10H20O	aldehyde	decanal	nitrogen	2018	October	6	4.97172	6_n	2.73
0.587	C6H12O	aldehyde	hexanal	nitrogen	2018	October	6	3.49528	6_n	2.79
0.587	C6H12O	aldehyde	hexanal	nitrogen	2018	August	11	3.24985	11_n	2.96
0.587	C6H12O	aldehyde	hexanal	nitrogen	2018	June	9	7.28589	9_n	2.98
1.388	C10H20O	aldehyde	decanal	nitrogen	2018	August	9	4.20786	9_n	3.15
0.691	C6H10O	aldehyde	trans-2-hexen-1-al	nitrogen	2018	June	6	6.4119	6_n	3.33
1.198	C9H18O	aldehyde	nonanal	nitrogen	2018	August	6	5.65848	6_n	3.39
0.995	C8H16O	aldehyde	octanal	nitrogen	2018	June	6	5.3351	6_n	3.39
0.587	C6H12O	aldehyde	hexanal	nitrogen	2018	October	9	3.93512	9_n	3.48
0.587	C6H12O	aldehyde	hexanal	nitrogen	2018	August	9	4.07701	9_n	4
0.587	C6H12O	aldehyde	hexanal	nitrogen	2018	June	6	8.84966	6_n	4.29
1.198	C9H18O	aldehyde	nonanal	nitrogen	2018	August	9	8.77686	9_n	7.27
1.198	C9H18O	aldehyde	nonanal	nitrogen	2018	August	11	9.16621	11_n	7.47
0.995	C8H16O	aldehyde	octanal	nitrogen	2018	June	9	9.08863	9_n	7.98
1.198	C9H18O	aldehyde	nonanal	nitrogen	2018	June	6	15.436	6_n	8.5
1.388	C10H20O	aldehyde	decanal	nitrogen	2018	June	6	11.6435	6_n	8.67
1.388	C10H20O	aldehyde	decanal	nitrogen	2018	June	9	17.7091	9_n	16.25
1.198	C9H18O	aldehyde	nonanal	nitrogen	2018	June	9	34.8411	9_n	31.58
1.093	C10H20	alkane	alkane	nitrogen	2018	August	9	0.0238634	9_n	0.01
0.911		alkane	alkane	nitrogen	2018	June	9	0.0513088	9_n	0.01
1.093	C10H20	alkane	alkane	nitrogen	2018	October	6	0.0318105	6_n	0.01
1.093	C10H20	alkane	alkane	nitrogen	2018	August	11	0.0300204	11_n	0.02
0.911		alkane	alkane	nitrogen	2018	June	6	0.0619043	6_n	0.02
2.451	C20H32	alkane	p-camphorene	nitrogen	2018	October	6	0.0840939	6_n	0.02
1.552	C13H28	alkane	tridecane	nitrogen	2018	August	9	0.431883	9_n	0.03
1.141		alkane	alkane	nitrogen	2018	June	6	0.100515	6_n	0.03
1.093	C10H20	alkane	alkane	nitrogen	2018	October	11	0.0462794	11_n	0.03
0.406	C8H18	alkane	2,2,3,3-tetramethyl-butane	nitrogen	2018	August	9	0.229224	9_n	0.04
1.608	C16H34	alkane	2,2,4,4,6,8,8-heptamethyl-nonane	nitrogen	2018	June	6	0.104808	6_n	0.04
1.093	C10H20	alkane	alkane	nitrogen	2018	June	9	0.076171	9_n	0.04
1.093	C10H20	alkane	alkane	nitrogen	2018	October	9	0.0522948	9_n	0.04
1.186	C11H24	alkane	undecane	nitrogen	2018	August	6	0.370112	6_n	0.06
2.446	C20H42	alkane	alkane	nitrogen	2018	June	9	3.09634	9_n	0.06
1.105		alkane	alkane	nitrogen	2018	June	6	0.137869	6_n	0.06
2.419	C20H32	alkane	m-camphorene	nitrogen	2018	August	11	0.196318	11_n	0.07
2.419	C20H32	alkane	m-camphorene	nitrogen	2018	August	9	0.194217	9_n	0.07
2.277		alkane	alkane	nitrogen	2018	June	9	2.79825	9_n	0.07
1.374	C12H26	alkane	dodecane	nitrogen	2018	August	9	0.520175	9_n	0.08
0.389	C7H16	alkane	3-methyl-hexane	nitrogen	2018	June	9	0.954654	9_n	0.08
1.093	C10H20	alkane	alkane	nitrogen	2018	June	6	0.119654	6_n	0.08
0.605	C8H16	alkane	alkane	nitrogen	2018	August	11	0.465499	11_n	0.09
2.451	C20H32	alkane	p-camphorene	nitrogen	2018	October	9	0.142528	9_n	0.09
2.451	C20H32	alkane	p-camphorene	nitrogen	2018	June	6	0.0917599	6_n	0.1
1.105		alkane	alkane	nitrogen	2018	June	9	0.167209	9_n	0.1
2.419	C20H32	alkane	m-camphorene	nitrogen	2018	June	6	0.214754	6_n	0.1
1.599	C15H32	alkane	2,6,10-trimethyl-dodecane	nitrogen	2018	June	6	0.249347	6_n	0.11
1.608	C16H34	alkane	2,2,4,4,6,8,8-heptamethyl-nonane	nitrogen	2018	June	9	0.165995	9_n	0.11
2.027		alkane	alkane	nitrogen	2018	June	6	2.35593	6_n	0.12
0.285	C5H10	alkane	cyclopentane	nitrogen	2018	August	9	1.84835	9_n	0.13
2.419	C20H32	alkane	m-camphorene	nitrogen	2018	October	11	0.186619	11_n	0.13
1.877		alkane	alkane	nitrogen	2018	June	6	1.67038	6_n	0.14
2.451	C20H32	alkane	p-camphorene	nitrogen	2018	June	9	0.134096	9_n	0.15
1.552	C13H28	alkane	tridecane	nitrogen	2018	August	6	0.564371	6_n	0.16
2.419	C20H32	alkane	m-camphorene	nitrogen	2018	June	9	0.25326	9_n	0.16
1.186	C11H24	alkane	undecane	nitrogen	2018	August	9	0.448972	9_n	0.17
0.63	C9H20	alkane	2,4-dimethyl-heptane	nitrogen	2018	August	9	0.58049	9_n	0.18
0.339	C6H12	alkane	methyl cyclopentane	nitrogen	2018	June	6	0.579357	6_n	0.18
2.419	C20H32	alkane	m-camphorene	nitrogen	2018	October	9	0.275409	9_n	0.23
0.63	C9H20	alkane	2,4-dimethyl-heptane	nitrogen	2018	October	6	0.545759	6_n	0.24
0.306	C6H14	alkane	hexane	nitrogen	2018	June	6	1.96157	6_n	0.25
0.587	C8H18	alkane	octane	nitrogen	2018	June	9	1.45749	9_n	0.26
0.421	C7H16	alkane	heptane	nitrogen	2018	June	9	1.27345	9_n	0.27
1.374	C12H26	alkane	dodecane	nitrogen	2018	June	6	1.44484	6_n	0.28
0.283	C6H14	alkane	2-methyl-pentane	nitrogen	2018	August	9	1.1649	9_n	0.29
0.285	C5H10	alkane	cyclopentane	nitrogen	2018	June	6	1.76108	6_n	0.29
2.419	C20H32	alkane	m-camphorene	nitrogen	2018	October	6	0.343277	6_n	0.29
0.63	C9H20	alkane	2,4-dimethyl-heptane	nitrogen	2018	October	11	0.59137	11_n	0.31
1.141		alkane	alkane	nitrogen	2018	August	9	0.594258	9_n	0.32
0.567	C8H16	alkane	3-methylene-heptane	nitrogen	2018	October	11	0.491253	11_n	0.32
0.406	C8H18	alkane	2,2,3,3-tetramethyl-butane	nitrogen	2018	October	6	0.760936	6_n	0.32
0.283	C6H14	alkane	2-methyl-pentane	nitrogen	2018	August	6	1.26154	6_n	0.33
0.238	C5H12	alkane	2-methyl-butane	nitrogen	2018	June	9	1.21033	9_n	0.33
0.285	C5H10	alkane	cyclopentane	nitrogen	2018	October	6	1.29749	6_n	0.34
0.605	C8H16	alkane	alkane	nitrogen	2018	October	6	0.521726	6_n	0.35
0.605	C8H16	alkane	alkane	nitrogen	2018	August	6	0.752582	6_n	0.39
0.605	C8H16	alkane	alkane	nitrogen	2018	October	11	0.545817	11_n	0.39
0.63	C9H20	alkane	2,4-dimethyl-heptane	nitrogen	2018	October	9	0.647936	9_n	0.39
0.306	C6H14	alkane	hexane	nitrogen	2018	August	11	0.920161	11_n	0.4
0.587	C8H18	alkane	octane	nitrogen	2018	June	6	1.65736	6_n	0.4
1.186	C11H24	alkane	undecane	nitrogen	2018	June	6	0.945968	6_n	0.4
0.406	C8H18	alkane	2,2,3,3-tetramethyl-butane	nitrogen	2018	August	11	0.562482	11_n	0.41
2.169		alkane	alkane	nitrogen	2018	June	9	2.20073	9_n	0.42
0.238	C5H12	alkane	2-methyl-butane	nitrogen	2018	June	6	1.35362	6_n	0.42
0.567	C8H16	alkane	3-methylene-heptane	nitrogen	2018	October	6	0.600555	6_n	0.42
1.374	C12H26	alkane	dodecane	nitrogen	2018	August	6	0.881164	6_n	0.45
1.186	C11H24	alkane	undecane	nitrogen	2018	August	11	0.733698	11_n	0.47
0.406	C8H18	alkane	2,2,3,3-tetramethyl-butane	nitrogen	2018	October	9	0.873445	9_n	0.49
0.285	C5H10	alkane	cyclopentane	nitrogen	2018	August	11	2.25202	11_n	0.53
2.36		alkane	alkane	nitrogen	2018	June	9	3.34375	9_n	0.54
0.605	C8H16	alkane	alkane	nitrogen	2018	October	9	0.669651	9_n	0.54
0.306	C6H14	alkane	hexane	nitrogen	2018	August	6	1.08542	6_n	0.55
0.389	C7H16	alkane	3-methyl-hexane	nitrogen	2018	June	6	1.44075	6_n	0.56
0.285	C5H10	alkane	cyclopentane	nitrogen	2018	October	11	1.47837	11_n	0.58
0.406	C8H18	alkane	2,2,3,3-tetramethyl-butane	nitrogen	2018	October	11	0.987135	11_n	0.59
0.421	C7H16	alkane	heptane	nitrogen	2018	June	6	1.63361	6_n	0.6
2.169		alkane	alkane	nitrogen	2018	June	6	2.47477	6_n	0.6
0.389	C7H16	alkane	3-methyl-hexane	nitrogen	2018	October	6	4.88144	6_n	0.63
2.29		alkane	alkane	nitrogen	2018	August	6	1.04323	6_n	0.64
0.63	C9H20	alkane	2,4-dimethyl-heptane	nitrogen	2018	June	6	1.54217	6_n	0.65
0.283	C6H14	alkane	2-methyl-pentane	nitrogen	2018	October	6	2.74627	6_n	0.67
2.277		alkane	alkane	nitrogen	2018	June	6	3.50764	6_n	0.7
1.141		alkane	alkane	nitrogen	2018	October	11	0.995221	11_n	0.76
0.283	C6H14	alkane	2-methyl-pentane	nitrogen	2018	August	11	1.64532	11_n	0.79
0.421	C7H16	alkane	heptane	nitrogen	2018	October	6	3.52348	6_n	0.8
1.552	C13H28	alkane	tridecane	nitrogen	2018	June	9	1.39096	9_n	0.84
2.027		alkane	alkane	nitrogen	2018	June	9	2.88495	9_n	0.85
0.406	C8H18	alkane	2,2,3,3-tetramethyl-butane	nitrogen	2018	June	6	2.25106	6_n	0.85
0.421	C7H16	alkane	heptane	nitrogen	2018	October	11	3.50199	11_n	0.87
1.374	C12H26	alkane	dodecane	nitrogen	2018	August	11	1.2563	11_n	0.89
0.63	C9H20	alkane	2,4-dimethyl-heptane	nitrogen	2018	August	11	1.23156	11_n	0.89
0.567	C8H16	alkane	3-methylene-heptane	nitrogen	2018	October	9	0.986444	9_n	0.9
1.186	C11H24	alkane	undecane	nitrogen	2018	October	11	1.01409	11_n	0.9
1.186	C11H24	alkane	undecane	nitrogen	2018	October	9	1.00277	9_n	0.91
0.421	C7H16	alkane	heptane	nitrogen	2018	August	11	2.14573	11_n	0.92
0.406	C8H18	alkane	2,2,3,3-tetramethyl-butane	nitrogen	2018	August	6	1.10526	6_n	0.99
1.186	C11H24	alkane	undecane	nitrogen	2018	June	9	1.42518	9_n	1
2.36		alkane	alkane	nitrogen	2018	June	6	3.93902	6_n	1.01
0.283	C6H14	alkane	2-methyl-pentane	nitrogen	2018	October	11	2.98389	11_n	1.01
1.141		alkane	alkane	nitrogen	2018	August	11	1.22918	11_n	1.02
0.306	C6H14	alkane	hexane	nitrogen	2018	October	6	1.84943	6_n	1.03
0.285	C5H10	alkane	cyclopentane	nitrogen	2018	October	9	1.861	9_n	1.06
2.29		alkane	alkane	nitrogen	2018	October	9	1.20014	9_n	1.08
1.141		alkane	alkane	nitrogen	2018	October	6	1.31899	6_n	1.09
2.652		alkane	alkane	nitrogen	2018	June	9	3.96191	9_n	1.11
1.141		alkane	alkane	nitrogen	2018	October	9	1.29956	9_n	1.13
2.027		alkane	alkane	nitrogen	2018	August	6	1.45458	6_n	1.18
2.446	C20H42	alkane	alkane	nitrogen	2018	June	6	4.30759	6_n	1.21
2.29		alkane	alkane	nitrogen	2018	August	9	1.53042	9_n	1.25
2.169		alkane	alkane	nitrogen	2018	August	6	1.28536	6_n	1.28
0.389	C7H16	alkane	3-methyl-hexane	nitrogen	2018	August	11	2.99848	11_n	1.29
2.29		alkane	alkane	nitrogen	2018	October	11	1.41761	11_n	1.29
1.552	C13H28	alkane	tridecane	nitrogen	2018	August	11	1.58326	11_n	1.31
2.027		alkane	alkane	nitrogen	2018	August	9	1.53397	9_n	1.35
0.389	C7H16	alkane	3-methyl-hexane	nitrogen	2018	October	11	5.41244	11_n	1.36
1.186	C11H24	alkane	undecane	nitrogen	2018	October	6	1.47008	6_n	1.37
2.027		alkane	alkane	nitrogen	2018	August	11	1.61497	11_n	1.4
0.587	C8H18	alkane	octane	nitrogen	2018	August	11	28.5118	11_n	1.47
2.169		alkane	alkane	nitrogen	2018	August	11	1.46464	11_n	1.52
2.29		alkane	alkane	nitrogen	2018	October	6	1.69637	6_n	1.56
2.169		alkane	alkane	nitrogen	2018	October	11	1.54797	11_n	1.6
2.169		alkane	alkane	nitrogen	2018	August	9	1.50887	9_n	1.61
1.374	C12H26	alkane	dodecane	nitrogen	2018	October	9	1.7116	9_n	1.67
1.374	C12H26	alkane	dodecane	nitrogen	2018	June	9	2.59263	9_n	1.68
2.36		alkane	alkane	nitrogen	2018	August	9	2.00527	9_n	1.74
0.283	C6H14	alkane	2-methyl-pentane	nitrogen	2018	October	9	3.572	9_n	1.76
2.36		alkane	alkane	nitrogen	2018	October	11	1.86338	11_n	1.79
2.36		alkane	alkane	nitrogen	2018	August	6	2.24598	6_n	1.9
1.552	C13H28	alkane	tridecane	nitrogen	2018	October	9	1.85698	9_n	1.92
2.36		alkane	alkane	nitrogen	2018	October	9	1.96271	9_n	1.95
1.141		alkane	alkane	nitrogen	2018	August	6	2.1357	6_n	1.98
2.446	C20H42	alkane	alkane	nitrogen	2018	August	6	2.53012	6_n	2.01
1.599	C15H32	alkane	2,6,10-trimethyl-dodecane	nitrogen	2018	June	9	1.89398	9_n	2.01
2.277		alkane	alkane	nitrogen	2018	August	6	2.21638	6_n	2.02
2.169		alkane	alkane	nitrogen	2018	October	9	1.88919	9_n	2.03
0.285	C5H10	alkane	cyclopentane	nitrogen	2018	August	6	3.73312	6_n	2.09
2.027		alkane	alkane	nitrogen	2018	October	11	2.19622	11_n	2.09
2.446	C20H42	alkane	alkane	nitrogen	2018	October	9	2.10625	9_n	2.1
0.306	C6H14	alkane	hexane	nitrogen	2018	October	11	2.77028	11_n	2.11
2.027		alkane	alkane	nitrogen	2018	October	9	2.23562	9_n	2.19
2.446	C20H42	alkane	alkane	nitrogen	2018	August	9	2.57821	9_n	2.2
2.545	C21H44	alkane	heneicosane	nitrogen	2018	June	6	5.25001	6_n	2.25
1.374	C12H26	alkane	dodecane	nitrogen	2018	October	11	2.27249	11_n	2.25
2.29		alkane	alkane	nitrogen	2018	August	11	2.50518	11_n	2.3
2.36		alkane	alkane	nitrogen	2018	October	6	2.42432	6_n	2.35
0.63	C9H20	alkane	2,4-dimethyl-heptane	nitrogen	2018	August	6	2.65726	6_n	2.42
2.277		alkane	alkane	nitrogen	2018	October	11	2.50027	11_n	2.43
2.277		alkane	alkane	nitrogen	2018	August	11	2.63247	11_n	2.55
2.446	C20H42	alkane	alkane	nitrogen	2018	October	11	2.58374	11_n	2.58
1.105		alkane	alkane	nitrogen	2018	June	9	3.41261	9_n	2.8
1.105		alkane	alkane	nitrogen	2018	June	6	3.59886	6_n	2.82
2.446	C20H42	alkane	alkane	nitrogen	2018	October	6	2.88411	6_n	2.84
1.552	C13H28	alkane	tridecane	nitrogen	2018	October	11	2.73696	11_n	2.85
2.277		alkane	alkane	nitrogen	2018	August	9	2.90098	9_n	2.93
2.652		alkane	alkane	nitrogen	2018	June	6	5.84589	6_n	2.96
1.877		alkane	alkane	nitrogen	2018	June	9	4.08477	9_n	3
0.421	C7H16	alkane	heptane	nitrogen	2018	October	9	5.30301	9_n	3.03
0.306	C6H14	alkane	hexane	nitrogen	2018	October	9	3.65505	9_n	3.2
2.36		alkane	alkane	nitrogen	2018	August	11	3.72485	11_n	3.61
2.277		alkane	alkane	nitrogen	2018	October	9	3.4736	9_n	3.61
2.169		alkane	alkane	nitrogen	2018	October	6	3.52349	6_n	3.72
1.374	C12H26	alkane	dodecane	nitrogen	2018	October	6	3.76136	6_n	3.82
1.105		alkane	alkane	nitrogen	2018	June	9	3.41261	9_n	3.83
1.105		alkane	alkane	nitrogen	2018	June	6	3.59886	6_n	3.85
2.027		alkane	alkane	nitrogen	2018	October	6	3.99901	6_n	4
1.52	C15H32	alkane	2,6,11-trimethyl-dodecane	nitrogen	2018	June	9	3.55508	9_n	4.06
1.552	C13H28	alkane	tridecane	nitrogen	2018	October	6	4.1415	6_n	4.31
0.389	C7H16	alkane	3-methyl-hexane	nitrogen	2018	October	9	9.59695	9_n	6.3
2.277		alkane	alkane	nitrogen	2018	October	6	6.60062	6_n	6.84
2.446	C20H42	alkane	alkane	nitrogen	2018	August	11	8.23241	11_n	8.46
0.587	C8H18	alkane	octane	nitrogen	2018	October	6	26.0206	6_n	13.08
0.587	C8H18	alkane	octane	nitrogen	2018	October	9	27.3798	9_n	16.03
0.587	C8H18	alkane	octane	nitrogen	2018	October	11	31.3655	11_n	19.76
0.636	C8H14	alkene	1,3-octadiene	nitrogen	2018	June	6	0.0818269	6_n	0.04
0.571	C8H16	alkene	1-octene	nitrogen	2018	October	6	1.17635	6_n	0.19
0.401	C6H10	alkene	cyclohexene	nitrogen	2018	October	9	1.10009	9_n	0.2
0.401	C6H10	alkene	cyclohexene	nitrogen	2018	October	11	1.13427	11_n	0.21
0.636	C8H14	alkene	1,3-octadiene	nitrogen	2018	June	9	0.292113	9_n	0.28
0.401	C6H10	alkene	cyclohexene	nitrogen	2018	August	9	1.30592	9_n	0.29
0.401	C6H10	alkene	cyclohexene	nitrogen	2018	June	6	3.46312	6_n	0.32
0.571	C8H16	alkene	1-octene	nitrogen	2018	October	11	1.35375	11_n	0.43
0.471	C8H16	alkene	3,4,4-trimethyl-2-pentene	nitrogen	2018	October	9	0.879167	9_n	0.54
0.471	C8H16	alkene	3,4,4-trimethyl-2-pentene	nitrogen	2018	October	6	1.01784	6_n	0.64
0.471	C8H16	alkene	3,4,4-trimethyl-2-pentene	nitrogen	2018	October	11	1.20086	11_n	0.87
0.571	C8H16	alkene	1-octene	nitrogen	2018	August	11	2.15582	11_n	1.01
0.571	C8H16	alkene	1-octene	nitrogen	2018	August	6	2.33623	6_n	1.15
0.571	C8H16	alkene	1-octene	nitrogen	2018	October	9	2.01215	9_n	1.22
0.401	C6H10	alkene	cyclohexene	nitrogen	2018	August	11	2.57861	11_n	1.68
0.471	C8H16	alkene	3,4,4-trimethyl-2-pentene	nitrogen	2018	August	11	3.05264	11_n	2.04
0.401	C6H10	alkene	cyclohexene	nitrogen	2018	August	6	4.24604	6_n	3.43
0.844	C9H12	Bz	(1-methylethyl)benzene	nitrogen	2018	June	6	0.0332024	6_n	0.01
0.962	C9H10	Bz	a-methylstyrene	nitrogen	2018	August	6	0.154063	6_n	0.05
0.715	C8H10	Bz	ethylbenzene	nitrogen	2018	June	6	0.223216	6_n	0.07
0.535	C7H8	Bz	toluene	nitrogen	2018	October	6	1.87153	6_n	0.07
0.962	C9H10	Bz	a-methylstyrene	nitrogen	2018	August	11	0.174002	11_n	0.08
0.987	C9H12	Bz	bz	nitrogen	2018	June	6	0.22218	6_n	0.08
0.962	C9H10	Bz	a-methylstyrene	nitrogen	2018	October	6	0.180213	6_n	0.09
0.775	C8H8	Bz	styrene	nitrogen	2018	June	6	0.2218	6_n	0.1
0.781	C8H10	Bz	o-xylene	nitrogen	2018	August	9	0.329408	9_n	0.11
0.962	C9H10	Bz	a-methylstyrene	nitrogen	2018	October	11	0.213115	11_n	0.13
0.781	C8H10	Bz	o-xylene	nitrogen	2018	October	6	0.379377	6_n	0.13
0.54	C7H8	Bz	bz	nitrogen	2018	June	6	0.298665	6_n	0.16
0.781	C8H10	Bz	o-xylene	nitrogen	2018	October	11	0.42418	11_n	0.19
0.535	C7H8	Bz	toluene	nitrogen	2018	August	9	1.2115	9_n	0.2
0.781	C8H10	Bz	o-xylene	nitrogen	2018	June	6	0.641779	6_n	0.22
0.732	C8H10	Bz	p-xylene	nitrogen	2018	October	11	1.20943	11_n	0.22
0.781	C8H10	Bz	o-xylene	nitrogen	2018	October	9	0.455486	9_n	0.24
0.732	C8H10	Bz	p-xylene	nitrogen	2018	October	9	1.23984	9_n	0.29
0.962	C9H10	Bz	a-methylstyrene	nitrogen	2018	October	9	0.358042	9_n	0.3
0.781	C8H10	Bz	o-xylene	nitrogen	2018	August	11	0.539087	11_n	0.33
0.535	C7H8	Bz	toluene	nitrogen	2018	October	11	2.19592	11_n	0.49
0.535	C7H8	Bz	toluene	nitrogen	2018	October	9	2.27475	9_n	0.63
0.781	C8H10	Bz	o-xylene	nitrogen	2018	August	6	0.870896	6_n	0.68
0.732	C8H10	Bz	p-xylene	nitrogen	2018	August	11	1.70197	11_n	0.89
0.535	C7H8	Bz	toluene	nitrogen	2018	August	11	1.88531	11_n	0.92
0.535	C7H8	Bz	toluene	nitrogen	2018	June	6	3.18311	6_n	0.92
0.377	C6H6	Bz	benzene	nitrogen	2018	June	6	2.42619	6_n	0.98
0.377	C6H6	Bz	benzene	nitrogen	2018	August	6	5.65373	6_n	1.58
0.377	C6H6	Bz	benzene	nitrogen	2018	October	6	5.18046	6_n	1.64
0.535	C7H8	Bz	toluene	nitrogen	2018	August	6	2.66718	6_n	1.73
0.732	C8H10	Bz	p-xylene	nitrogen	2018	August	6	2.74855	6_n	1.99
0.377	C6H6	Bz	benzene	nitrogen	2018	October	11	5.42105	11_n	2.05
0.377	C6H6	Bz	benzene	nitrogen	2018	August	11	5.9705	11_n	2.08
0.377	C6H6	Bz	benzene	nitrogen	2018	October	9	8.42446	9_n	5.64
0.402	C5H10O2	ester	methyl isobutyrate	nitrogen	2018	August	11	0.0180954	11_n	0.01
0.547	C6H12O2	ester	butanoic acid, 2-methyl-, methyl ester	nitrogen	2018	August	11	0.0171518	11_n	0.01
0.338	C4H8O2	ester	methyl propionate	nitrogen	2018	August	11	0.0383064	11_n	0.01
0.338	C4H8O2	ester	methyl propionate	nitrogen	2018	June	9	0.10836	9_n	0.01
0.588	C6H12O2	ester	butanoic acid, ethyl ester	nitrogen	2018	June	9	0.0265332	9_n	0.01
0.456	C5H10O2	ester	butanoic acid, methyl ester	nitrogen	2018	October	6	0.00552703	6_n	0.01
0.456	C5H10O2	ester	butanoic acid, methyl ester	nitrogen	2018	October	9	0.00725234	9_n	0.01
0.547	C6H12O2	ester	butanoic acid, 2-methyl-, methyl ester	nitrogen	2018	October	6	0.0160452	6_n	0.01
1	C8H14O2	ester	cis-3-hexenyl acetate	nitrogen	2018	October	6	0.0753552	6_n	0.01
0.547	C6H12O2	ester	butanoic acid, 2-methyl-, methyl ester	nitrogen	2018	October	11	0.0201732	11_n	0.01
0.547	C6H12O2	ester	butanoic acid, 2-methyl-, methyl ester	nitrogen	2018	August	6	0.0289312	6_n	0.02
0.588	C6H12O2	ester	butanoic acid, ethyl ester	nitrogen	2018	June	6	0.0331216	6_n	0.02
0.735	C7H14O2	ester	1-butanol, 3-methyl-, acetate	nitrogen	2018	June	9	0.167074	9_n	0.02
0.321	C4H8O2	ester	ethyl acetate	nitrogen	2018	June	9	0.388641	9_n	0.02
1	C8H14O2	ester	cis-3-hexenyl acetate	nitrogen	2018	October	11	0.0824913	11_n	0.02
0.439	C5H8O2	ester	methyl methacrylate	nitrogen	2018	October	9	0.240548	9_n	0.02
0.402	C5H10O2	ester	methyl isobutyrate	nitrogen	2018	October	11	0.0660793	11_n	0.02
0.613	C6H12O2	ester	acetic acid, butyl ester	nitrogen	2018	June	6	0.075564	6_n	0.03
0.741	C7H14O2	ester	1-butanol, 2-methyl-, acetate	nitrogen	2018	June	6	0.0984571	6_n	0.03
0.338	C4H8O2	ester	methyl propionate	nitrogen	2018	October	6	0.0836133	6_n	0.03
0.402	C5H10O2	ester	methyl isobutyrate	nitrogen	2018	October	6	0.0710943	6_n	0.03
0.338	C4H8O2	ester	methyl propionate	nitrogen	2018	October	11	0.102494	11_n	0.05
1	C8H14O2	ester	cis-3-hexenyl acetate	nitrogen	2018	October	9	0.106952	9_n	0.05
0.338	C4H8O2	ester	methyl propionate	nitrogen	2018	June	6	0.161327	6_n	0.06
1.351	C10H18O2	ester	cis-3-hexenyl butyrate	nitrogen	2018	June	6	0.185658	6_n	0.11
1.351	C10H18O2	ester	cis-3-hexenyl butyrate	nitrogen	2018	June	9	0.182118	9_n	0.11
0.402	C5H10O2	ester	methyl isobutyrate	nitrogen	2018	October	9	0.142695	9_n	0.11
1	C8H14O2	ester	cis-3-hexenyl acetate	nitrogen	2018	June	6	0.246229	6_n	0.12
0.338	C4H8O2	ester	methyl propionate	nitrogen	2018	October	9	0.157385	9_n	0.12
0.613	C6H12O2	ester	acetic acid, butyl ester	nitrogen	2018	June	9	0.16065	9_n	0.13
0.735	C7H14O2	ester	1-butanol, 3-methyl-, acetate	nitrogen	2018	June	6	0.276412	6_n	0.13
1	C8H14O2	ester	cis-3-hexenyl acetate	nitrogen	2018	June	9	0.281319	9_n	0.17
0.439	C5H8O2	ester	methyl methacrylate	nitrogen	2018	October	11	0.394092	11_n	0.19
0.439	C5H8O2	ester	methyl methacrylate	nitrogen	2018	October	6	0.438992	6_n	0.23
0.439	C5H8O2	ester	methyl methacrylate	nitrogen	2018	August	6	0.546151	6_n	0.32
2.549	C20H40O2	ester	dodecanoic acid, isooctyl ester	nitrogen	2018	June	6	1.35892	6_n	0.35
0.321	C4H8O2	ester	ethyl acetate	nitrogen	2018	June	6	0.727743	6_n	0.37
1.012	C8H16O2	ester	acetic acid, hexyl ester	nitrogen	2018	June	9	0.81929	9_n	0.43
1.012	C8H16O2	ester	acetic acid, hexyl ester	nitrogen	2018	June	6	0.933034	6_n	0.51
2.549	C20H40O2	ester	dodecanoic acid, isooctyl ester	nitrogen	2018	August	6	3.25772	6_n	1.01
2.298	C17H34O2	ester	isopropyl myristate	nitrogen	2018	June	9	3.05314	9_n	1.21
2.549	C20H40O2	ester	dodecanoic acid, isooctyl ester	nitrogen	2018	June	9	3.2283	9_n	2.57
2.549	C20H40O2	ester	dodecanoic acid, isooctyl ester	nitrogen	2018	August	9	4.71083	9_n	2.85
2.549	C20H40O2	ester	dodecanoic acid, isooctyl ester	nitrogen	2018	October	9	6.66496	9_n	6.12
2.549	C20H40O2	ester	dodecanoic acid, isooctyl ester	nitrogen	2018	October	11	7.11061	11_n	6.44
2.549	C20H40O2	ester	dodecanoic acid, isooctyl ester	nitrogen	2018	October	6	13.3576	6_n	13.08
2.549	C20H40O2	ester	dodecanoic acid, isooctyl ester	nitrogen	2018	August	11	16.1244	11_n	15.51
0.338	C4H8O	furan	tetrahydrofuran	nitrogen	2018	August	11	0.184019	11_n	0.06
0.382	C5H10O	furan	furan	nitrogen	2018	June	6	0.242931	6_n	0.07
0.338	C4H8O	furan	tetrahydrofuran	nitrogen	2018	August	6	0.224078	6_n	0.1
0.338	C4H8O	furan	tetrahydrofuran	nitrogen	2018	October	6	0.183409	6_n	0.1
0.338	C4H8O	furan	tetrahydrofuran	nitrogen	2018	June	6	0.60023	6_n	0.16
0.338	C4H8O	furan	tetrahydrofuran	nitrogen	2018	June	9	0.573516	9_n	0.16
0.313	C5H6O	furan	2-methylfuran	nitrogen	2018	August	9	0.971517	9_n	0.23
0.313	C5H6O	furan	2-methylfuran	nitrogen	2018	June	6	1.23993	6_n	0.26
0.313	C5H6O	furan	2-methylfuran	nitrogen	2018	October	6	0.889588	6_n	0.29
0.313	C5H6O	furan	2-methylfuran	nitrogen	2018	October	11	0.916897	11_n	0.35
0.338	C4H8O	furan	tetrahydrofuran	nitrogen	2018	October	11	0.475381	11_n	0.44
0.313	C5H6O	furan	2-methylfuran	nitrogen	2018	August	11	1.19812	11_n	0.46
1.664	C8H6O2	furan	1(3h)-isobenzofuranone	nitrogen	2018	June	9	1.5139	9_n	0.6
0.338	C4H8O	furan	tetrahydrofuran	nitrogen	2018	October	9	0.627938	9_n	0.62
0.313	C5H6O	furan	2-methylfuran	nitrogen	2018	August	6	1.45344	6_n	0.71
0.382	C5H8O	furan	2-ethylacrolein	nitrogen	2018	October	6	3.66319	6_n	0.83
0.313	C5H6O	furan	2-methylfuran	nitrogen	2018	October	9	1.35717	9_n	0.88
0.653	C5H4O2	furan	2-furaldehyde	nitrogen	2018	October	6	1.27749	6_n	0.9
0.653	C5H4O2	furan	2-furaldehyde	nitrogen	2018	June	9	2.51317	9_n	0.95
0.653	C5H4O2	furan	2-furaldehyde	nitrogen	2018	October	11	1.44346	11_n	1.12
1.664	C8H6O2	furan	1(3h)-isobenzofuranone	nitrogen	2018	June	6	2.11081	6_n	1.18
0.653	C5H4O2	furan	2-furaldehyde	nitrogen	2018	August	11	1.11328	11_n	1.25
0.653	C5H4O2	furan	2-furaldehyde	nitrogen	2018	August	6	1.16093	6_n	1.27
0.653	C5H4O2	furan	2-furaldehyde	nitrogen	2018	October	9	1.53819	9_n	1.27
0.653	C5H4O2	furan	2-furaldehyde	nitrogen	2018	August	9	1.57697	9_n	1.81
0.382	C5H8O	furan	2-ethylacrolein	nitrogen	2018	August	11	6.45635	11_n	2.08
0.653	C5H4O2	furan	2-furaldehyde	nitrogen	2018	June	6	4.29076	6_n	2.75
0.382	C5H8O	furan	2-ethylacrolein	nitrogen	2018	October	11	5.67186	11_n	3.18
0.382	C5H8O	furan	2-ethylacrolein	nitrogen	2018	October	9	16.2728	9_n	15.49
1.077	C6H4Cl2	halogen	1,4-dichloro-benzene	nitrogen	2018	October	6	0.174777	6_n	0.02
1.077	C6H4Cl2	halogen	1,4-dichloro-benzene	nitrogen	2018	June	6	0.262324	6_n	0.03
1.077	C6H4Cl2	halogen	1,4-dichloro-benzene	nitrogen	2018	October	9	0.198057	9_n	0.06
1.077	C6H4Cl2	halogen	1,4-dichloro-benzene	nitrogen	2018	October	11	0.220807	11_n	0.08
1.077	C6H4Cl2	halogen	1,4-dichloro-benzene	nitrogen	2018	August	9	0.40926	9_n	0.24
1.077	C6H4Cl2	halogen	1,4-dichloro-benzene	nitrogen	2018	August	11	0.672642	11_n	0.52
1.077	C6H4Cl2	halogen	1,4-dichloro-benzene	nitrogen	2018	August	6	1.17689	6_n	1.06
0.228	C5H8	isoprene	isoprene	nitrogen	2018	October	6	2.44813	6_n	0.17
0.228	C5H8	isoprene	isoprene	nitrogen	2018	October	11	3.28519	11_n	1.17
0.228	C5H8	isoprene	isoprene	nitrogen	2018	June	6	5.84681	6_n	2.07
0.228	C5H8	isoprene	isoprene	nitrogen	2018	October	9	4.00517	9_n	2.08
0.228	C5H8	isoprene	isoprene	nitrogen	2018	August	9	8.10417	9_n	2.84
0.228	C5H8	isoprene	isoprene	nitrogen	2018	August	11	15.0163	11_n	10.36
0.228	C5H8	isoprene	isoprene	nitrogen	2018	August	6	15.5914	6_n	10.59
0.418	C5H10O	ketone	3-pentanone	nitrogen	2018	August	11	0.568706	11_n	0.07
1.812	C13H22O	ketone	6,10-dimethyl-5,9-undecadien-2-one	nitrogen	2018	August	6	0.187019	6_n	0.11
1.812	C13H22O	ketone	6,10-dimethyl-5,9-undecadien-2-one	nitrogen	2018	October	9	0.174591	9_n	0.12
1.812	C13H22O	ketone	6,10-dimethyl-5,9-undecadien-2-one	nitrogen	2018	August	11	0.202525	11_n	0.14
0.418	C5H10O	ketone	3-pentanone	nitrogen	2018	October	11	0.526614	11_n	0.14
0.404	C5H10O	ketone	2-pentanone	nitrogen	2018	October	11	0.390479	11_n	0.14
0.765	C7H14O	ketone	2-heptanone	nitrogen	2018	June	9	0.752106	9_n	0.17
0.404	C5H10O	ketone	2-pentanone	nitrogen	2018	October	6	0.423839	6_n	0.17
0.418	C5H10O	ketone	3-pentanone	nitrogen	2018	August	6	0.702518	6_n	0.2
1.812	C13H22O	ketone	6,10-dimethyl-5,9-undecadien-2-one	nitrogen	2018	October	11	0.302447	11_n	0.26
0.418	C5H10O	ketone	3-pentanone	nitrogen	2018	October	6	0.674741	6_n	0.29
0.418	C5H10O	ketone	3-pentanone	nitrogen	2018	June	6	0.874314	6_n	0.32
0.404	C5H10O	ketone	2-pentanone	nitrogen	2018	August	6	0.714651	6_n	0.35
0.404	C5H10O	ketone	2-pentanone	nitrogen	2018	June	6	0.760315	6_n	0.35
0.297	C4H6O	ketone	methyl vinyl ketone	nitrogen	2018	October	6	3.66461	6_n	0.38
1.812	C13H22O	ketone	6,10-dimethyl-5,9-undecadien-2-one	nitrogen	2018	October	6	0.429341	6_n	0.39
0.305	C4H6O	ketone	2-butanone	nitrogen	2018	August	11	2.54054	11_n	0.42
0.765	C7H14O	ketone	2-heptanone	nitrogen	2018	June	6	1.09361	6_n	0.5
0.305	C4H6O	ketone	2-butanone	nitrogen	2018	October	6	2.56458	6_n	0.81
0.305	C4H6O	ketone	2-butanone	nitrogen	2018	October	11	2.51259	11_n	0.82
0.404	C5H10O	ketone	2-pentanone	nitrogen	2018	October	9	0.996768	9_n	0.85
1.812	C13H22O	ketone	6,10-dimethyl-5,9-undecadien-2-one	nitrogen	2018	August	9	0.858185	9_n	0.89
0.418	C5H10O	ketone	3-pentanone	nitrogen	2018	October	9	1.32811	9_n	1.07
0.297	C4H6O	ketone	methyl vinyl ketone	nitrogen	2018	August	9	6.3152	9_n	1.08
0.305	C4H6O	ketone	2-butanone	nitrogen	2018	August	6	3.29712	6_n	1.18
0.305	C4H6O	ketone	2-butanone	nitrogen	2018	June	6	4.30534	6_n	1.3
1.812	C13H22O	ketone	6,10-dimethyl-5,9-undecadien-2-one	nitrogen	2018	June	9	1.74814	9_n	1.78
0.297	C4H6O	ketone	methyl vinyl ketone	nitrogen	2018	August	11	7.14508	11_n	1.84
0.297	C4H6O	ketone	methyl vinyl ketone	nitrogen	2018	October	11	4.91296	11_n	1.87
0.305	C4H6O	ketone	2-butanone	nitrogen	2018	October	9	3.49662	9_n	2.02
0.297	C4H6O	ketone	methyl vinyl ketone	nitrogen	2018	October	9	5.14761	9_n	2.28
1.812	C13H22O	ketone	6,10-dimethyl-5,9-undecadien-2-one	nitrogen	2018	June	6	2.6871	6_n	2.71
0.962	C8H14O	ketone	6-methyl-5-hepten-2-one	nitrogen	2018	June	6	4.51364	6_n	3.59
0.297	C4H6O	ketone	methyl vinyl ketone	nitrogen	2018	August	6	11.9667	6_n	6.92
0.962	C8H14O	ketone	6-methyl-5-hepten-2-one	nitrogen	2018	June	9	17.8863	9_n	19.17
0.866	C10H16	MT	a-pinene	nitrogen	2018	August	11	0.0405782	11_n	0.01
1.022	C10H16	MT	3-carene	nitrogen	2018	June	6	0.0674248	6_n	0.01
1.361	C10H12	MT	mt	nitrogen	2018	June	6	0.0154337	6_n	0.01
1.177	C10H16	MT	terpinolene	nitrogen	2018	August	11	0.181593	11_n	0.02
1.009	C10H16	MT	a-phellandrene	nitrogen	2018	June	9	0.0723569	9_n	0.02
0.958	C10H16	MT	b-pinene	nitrogen	2018	June	6	0.0474549	6_n	0.02
0.958	C10H16	MT	b-pinene	nitrogen	2018	August	11	0.0571231	11_n	0.03
1.05	C10H14	MT	p-cymene	nitrogen	2018	August	11	0.236752	11_n	0.03
0.958	C10H16	MT	b-pinene	nitrogen	2018	August	9	0.0610008	9_n	0.03
1.05	C10H14	MT	p-cymene	nitrogen	2018	October	11	0.102701	11_n	0.03
0.958	C10H16	MT	b-pinene	nitrogen	2018	August	6	0.0691313	6_n	0.04
1.022	C10H16	MT	3-carene	nitrogen	2018	June	9	0.0853031	9_n	0.04
0.866	C10H16	MT	a-pinene	nitrogen	2018	October	11	0.0525314	11_n	0.04
0.866	C10H16	MT	a-pinene	nitrogen	2018	October	9	0.0532926	9_n	0.04
0.866	C10H16	MT	a-pinene	nitrogen	2018	October	6	0.0591231	6_n	0.04
1.009	C10H16	MT	a-phellandrene	nitrogen	2018	August	9	0.179346	9_n	0.05
1.117	C10H16	MT	y-terpinene	nitrogen	2018	June	9	0.117225	9_n	0.05
0.958	C10H16	MT	b-pinene	nitrogen	2018	October	11	0.0658272	11_n	0.05
0.958	C10H16	MT	b-pinene	nitrogen	2018	October	6	0.0685263	6_n	0.05
0.866	C10H16	MT	a-pinene	nitrogen	2018	August	6	0.0846267	6_n	0.06
1.009	C10H16	MT	a-phellandrene	nitrogen	2018	June	6	0.118186	6_n	0.06
1.05	C10H14	MT	p-cymene	nitrogen	2018	October	9	0.121233	9_n	0.06
0.958	C10H16	MT	b-pinene	nitrogen	2018	October	9	0.0807227	9_n	0.06
1.009	C10H16	MT	a-phellandrene	nitrogen	2018	August	11	0.206998	11_n	0.07
0.973	C10H16	MT	myrcene	nitrogen	2018	June	6	0.184834	6_n	0.07
1.177	C10H16	MT	terpinolene	nitrogen	2018	August	6	0.240567	6_n	0.08
1.117	C10H16	MT	y-terpinene	nitrogen	2018	June	6	0.14812	6_n	0.08
1.009	C10H16	MT	a-phellandrene	nitrogen	2018	August	6	0.234971	6_n	0.1
0.958	C10H16	MT	b-pinene	nitrogen	2018	June	9	0.11296	9_n	0.1
0.973	C10H16	MT	myrcene	nitrogen	2018	August	9	0.298385	9_n	0.14
0.946	C10H16	MT	mt	nitrogen	2018	June	9	0.133115	9_n	0.15
1.177	C10H16	MT	terpinolene	nitrogen	2018	October	6	0.220248	6_n	0.16
1.177	C10H16	MT	terpinolene	nitrogen	2018	October	11	0.219039	11_n	0.16
0.973	C10H16	MT	myrcene	nitrogen	2018	August	11	0.33347	11_n	0.17
1.05	C10H14	MT	p-cymene	nitrogen	2018	August	6	0.372869	6_n	0.17
0.973	C10H16	MT	myrcene	nitrogen	2018	June	9	0.276779	9_n	0.18
0.9	C10H16	MT	camphene	nitrogen	2018	October	6	0.507604	6_n	0.18
0.973	C10H16	MT	myrcene	nitrogen	2018	August	6	0.362395	6_n	0.19
1.009	C10H16	MT	a-phellandrene	nitrogen	2018	October	6	0.266032	6_n	0.19
0.973	C10H16	MT	myrcene	nitrogen	2018	October	11	0.323135	11_n	0.21
1.009	C10H16	MT	a-phellandrene	nitrogen	2018	October	11	0.282264	11_n	0.21
0.973	C10H16	MT	myrcene	nitrogen	2018	October	6	0.352775	6_n	0.23
1.087	C10H16	MT	ocimene	nitrogen	2018	August	9	0.455806	9_n	0.24
1.177	C10H16	MT	terpinolene	nitrogen	2018	October	9	0.277025	9_n	0.24
1.087	C10H16	MT	ocimene	nitrogen	2018	October	9	0.364362	9_n	0.28
1.009	C10H16	MT	a-phellandrene	nitrogen	2018	October	9	0.347255	9_n	0.3
1.087	C10H16	MT	ocimene	nitrogen	2018	June	9	1.15145	9_n	0.33
1.087	C10H16	MT	ocimene	nitrogen	2018	October	11	0.419362	11_n	0.33
0.973	C10H16	MT	myrcene	nitrogen	2018	October	9	0.440155	9_n	0.35
0.9	C10H16	MT	camphene	nitrogen	2018	October	11	0.668273	11_n	0.38
1.087	C10H16	MT	ocimene	nitrogen	2018	August	11	0.611742	11_n	0.4
1.087	C10H16	MT	ocimene	nitrogen	2018	October	6	0.519625	6_n	0.43
0.9	C10H16	MT	camphene	nitrogen	2018	October	9	1.04945	9_n	0.83
1.059	C10H16	MT	d-limonene	nitrogen	2018	August	11	2.28852	11_n	0.84
1.087	C10H16	MT	ocimene	nitrogen	2018	August	6	1.03693	6_n	0.85
1.087	C10H16	MT	ocimene	nitrogen	2018	June	6	1.87291	6_n	1.06
0.9	C10H16	MT	camphene	nitrogen	2018	August	11	1.68601	11_n	1.19
1.059	C10H16	MT	d-limonene	nitrogen	2018	October	9	2.49787	9_n	1.39
0.9	C10H16	MT	camphene	nitrogen	2018	August	6	2.05892	6_n	1.56
1.059	C10H16	MT	d-limonene	nitrogen	2018	October	11	3.45976	11_n	2.4
1.059	C10H16	MT	d-limonene	nitrogen	2018	October	6	3.86133	6_n	2.74
1.059	C10H16	MT	d-limonene	nitrogen	2018	August	6	5.83083	6_n	4.65
0.967	C7H5N	nitro	benzonitrile	nitrogen	2018	June	9	0.485699	9_n	0.08
1.037	C7H9N	nitro	4-cyanocyclohexene	nitrogen	2018	August	6	0.360078	6_n	0.22
0.243	C5H11NO	nitro	1-(dimethylamino)-2-propanone	nitrogen	2018	June	9	2.29923	9_n	0.58
0.243	C5H11NO	nitro	1-(dimethylamino)-2-propanone	nitrogen	2018	June	6	2.47552	6_n	0.65
0.967	C7H5N	nitro	benzonitrile	nitrogen	2018	June	6	1.08561	6_n	0.71
2.281	C10H15NO2S	nitro	n-butyl-benzenesulfonamide	nitrogen	2018	June	9	1.34118	9_n	0.75
2.281	C10H15NO2S	nitro	n-butyl-benzenesulfonamide	nitrogen	2018	August	6	1.73775	6_n	1.22
2.281	C10H15NO2S	nitro	n-butyl-benzenesulfonamide	nitrogen	2018	August	9	1.75069	9_n	1.32
2.281	C10H15NO2S	nitro	n-butyl-benzenesulfonamide	nitrogen	2018	October	9	1.53728	9_n	1.32
2.281	C10H15NO2S	nitro	n-butyl-benzenesulfonamide	nitrogen	2018	August	11	2.26408	11_n	1.85
2.281	C10H15NO2S	nitro	n-butyl-benzenesulfonamide	nitrogen	2018	October	6	2.32226	6_n	2.1
2.281	C10H15NO2S	nitro	n-butyl-benzenesulfonamide	nitrogen	2018	October	11	2.9184	11_n	2.83
1.375	C11H16O	oBz	obz	nitrogen	2018	August	6	0.0128241	6_n	0.01
1.22	C9H12O2	oBz	benzaldehyde dimethyl acetal	nitrogen	2018	June	9	0.00684475	9_n	0.01
1.482	C10H12O2	oBz	thymoquinone	nitrogen	2018	June	6	0.00928803	6_n	0.01
1.365	C9H10O	oBz	1-(3-methylphenyl)-ethanone	nitrogen	2018	October	11	0.019252	11_n	0.01
1.375	C11H16O	oBz	obz	nitrogen	2018	October	11	0.00803242	11_n	0.01
1.482	C10H12O2	oBz	thymoquinone	nitrogen	2018	October	9	0.0283258	9_n	0.01
1.22	C9H12O2	oBz	benzaldehyde dimethyl acetal	nitrogen	2018	August	9	0.0510116	9_n	0.02
1.482	C10H12O2	oBz	thymoquinone	nitrogen	2018	August	11	0.0399945	11_n	0.02
1.375	C11H16O	oBz	obz	nitrogen	2018	June	9	1.15215	9_n	0.02
1.365	C9H10O	oBz	1-(3-methylphenyl)-ethanone	nitrogen	2018	October	9	0.0311868	9_n	0.02
1.362	C10H14O	oBz	a,a,4-trimethyl-benzenemethanol	nitrogen	2018	October	11	0.0288258	11_n	0.02
1.22	C9H12O2	oBz	benzaldehyde dimethyl acetal	nitrogen	2018	August	11	0.0607492	11_n	0.03
1.22	C9H12O2	oBz	benzaldehyde dimethyl acetal	nitrogen	2018	August	6	0.0695867	6_n	0.03
1.482	C10H12O2	oBz	thymoquinone	nitrogen	2018	October	11	0.0393029	11_n	0.03
1.362	C10H14O	oBz	a,a,4-trimethyl-benzenemethanol	nitrogen	2018	October	9	0.0342694	9_n	0.03
1.362	C10H14O	oBz	a,a,4-trimethyl-benzenemethanol	nitrogen	2018	October	6	0.0366742	6_n	0.03
1.22	C9H12O2	oBz	benzaldehyde dimethyl acetal	nitrogen	2018	October	6	0.0656404	6_n	0.04
1.22	C9H12O2	oBz	benzaldehyde dimethyl acetal	nitrogen	2018	October	11	0.0657897	11_n	0.04
1.482	C10H12O2	oBz	thymoquinone	nitrogen	2018	October	6	0.0572962	6_n	0.04
1.168	C9H12O	oBz	a,a-dimethyl-benzenemethanol	nitrogen	2018	August	9	0.134264	9_n	0.05
1.482	C10H12O2	oBz	thymoquinone	nitrogen	2018	August	9	0.0639197	9_n	0.05
1.168	C9H12O	oBz	a,a-dimethyl-benzenemethanol	nitrogen	2018	June	6	0.169312	6_n	0.05
1.869		oBz	obz	nitrogen	2018	June	6	0.802638	6_n	0.05
1.365	C9H10O	oBz	1-(3-methylphenyl)-ethanone	nitrogen	2018	June	9	0.294458	9_n	0.05
1.764		oBz	obz	nitrogen	2018	June	6	0.181035	6_n	0.05
1.22	C9H12O2	oBz	benzaldehyde dimethyl acetal	nitrogen	2018	October	9	0.0755592	9_n	0.06
1.168	C9H12O	oBz	a,a-dimethyl-benzenemethanol	nitrogen	2018	August	11	0.166431	11_n	0.08
1.386	C8H8O3	oBz	methyl salicylate	nitrogen	2018	June	6	0.1104	6_n	0.08
1.168	C9H12O	oBz	a,a-dimethyl-benzenemethanol	nitrogen	2018	October	11	0.17632	11_n	0.12
1.168	C9H12O	oBz	a,a-dimethyl-benzenemethanol	nitrogen	2018	October	6	0.193145	6_n	0.14
1.168	C9H12O	oBz	a,a-dimethyl-benzenemethanol	nitrogen	2018	August	6	0.238662	6_n	0.15
1.139	C8H8O	oBz	4-methyl-benzaldehyde	nitrogen	2018	October	6	0.687597	6_n	0.15
1.764		oBz	obz	nitrogen	2018	June	9	0.298475	9_n	0.2
1.168	C9H12O	oBz	a,a-dimethyl-benzenemethanol	nitrogen	2018	October	9	0.246891	9_n	0.21
1.062	C7H8O	oBz	benzyl alcohol	nitrogen	2018	June	6	0.66518	6_n	0.22
1.482	C10H12O2	oBz	thymoquinone	nitrogen	2018	August	6	0.230837	6_n	0.23
1.424	C8H10O2	oBz	2-phenoxy-ethanol	nitrogen	2018	June	6	1.49412	6_n	0.26
1.386	C8H8O3	oBz	methyl salicylate	nitrogen	2018	June	9	0.262069	9_n	0.26
1.604	C8H6O4	oBz	1,2-benzenedicarboxylic acid	nitrogen	2018	August	9	0.570659	9_n	0.27
1.604	C8H6O4	oBz	1,2-benzenedicarboxylic acid	nitrogen	2018	October	9	0.492877	9_n	0.28
1.365	C9H10O	oBz	1-(3-methylphenyl)-ethanone	nitrogen	2018	June	6	0.590724	6_n	0.36
1.424	C8H10O2	oBz	2-phenoxy-ethanol	nitrogen	2018	October	11	0.481137	11_n	0.43
1.139	C8H8O	oBz	4-methyl-benzaldehyde	nitrogen	2018	August	11	1.16936	11_n	0.47
1.424	C8H10O2	oBz	2-phenoxy-ethanol	nitrogen	2018	October	9	0.530046	9_n	0.5
1.424	C8H10O2	oBz	2-phenoxy-ethanol	nitrogen	2018	October	6	0.571425	6_n	0.51
1.375	C11H16O	oBz	obz	nitrogen	2018	June	6	1.68562	6_n	0.54
1.604	C8H6O4	oBz	1,2-benzenedicarboxylic acid	nitrogen	2018	August	6	0.950466	6_n	0.66
1.139	C8H8O	oBz	4-methyl-benzaldehyde	nitrogen	2018	October	11	1.16927	11_n	0.71
1.604	C8H6O4	oBz	1,2-benzenedicarboxylic acid	nitrogen	2018	June	9	1.42849	9_n	0.74
1.869		oBz	obz	nitrogen	2018	June	9	1.38459	9_n	0.76
1.604	C8H6O4	oBz	1,2-benzenedicarboxylic acid	nitrogen	2018	October	11	1.08387	11_n	0.93
1.604	C8H6O4	oBz	1,2-benzenedicarboxylic acid	nitrogen	2018	October	6	1.12253	6_n	0.94
0.94	C6H6O	oBz	phenol	nitrogen	2018	August	11	2.48386	11_n	1.21
1.604	C8H6O4	oBz	1,2-benzenedicarboxylic acid	nitrogen	2018	August	11	1.43807	11_n	1.23
1.133	C8H8O	oBz	acetophenone	nitrogen	2018	August	9	4.31546	9_n	1.27
0.94	C6H6O	oBz	phenol	nitrogen	2018	August	9	2.57431	9_n	1.38
1.139	C8H8O	oBz	4-methyl-benzaldehyde	nitrogen	2018	August	6	2.14137	6_n	1.5
1.604	C8H6O4	oBz	1,2-benzenedicarboxylic acid	nitrogen	2018	June	6	2.19338	6_n	1.5
1.133	C8H8O	oBz	acetophenone	nitrogen	2018	June	9	13.3615	9_n	1.68
1.139	C8H8O	oBz	4-methyl-benzaldehyde	nitrogen	2018	October	9	2.0016	9_n	1.69
1.168	C9H12O	oBz	a,a-dimethyl-benzenemethanol	nitrogen	2018	June	9	1.60777	9_n	1.7
0.94	C6H6O	oBz	phenol	nitrogen	2018	June	6	5.11491	6_n	1.91
0.94	C6H6O	oBz	phenol	nitrogen	2018	October	11	2.85508	11_n	1.91
1.953	C10H6O3	oBz	phenylmaleic anhydride	nitrogen	2018	June	9	2.76127	9_n	1.94
0.94	C6H6O	oBz	phenol	nitrogen	2018	August	6	3.50958	6_n	2.26
1.953	C10H6O3	oBz	phenylmaleic anhydride	nitrogen	2018	June	6	3.46838	6_n	2.56
1.062	C7H8O	oBz	benzyl alcohol	nitrogen	2018	June	9	3.09947	9_n	3.05
1.133	C8H8O	oBz	acetophenone	nitrogen	2018	October	6	5.06131	6_n	3.23
0.94	C6H6O	oBz	phenol	nitrogen	2018	October	6	4.195	6_n	3.3
1.133	C8H8O	oBz	acetophenone	nitrogen	2018	October	11	5.05626	11_n	3.36
0.94	C6H6O	oBz	phenol	nitrogen	2018	October	9	4.15618	9_n	3.48
0.919	C7H6O	oBz	benzaldehyde	nitrogen	2018	August	9	15.1911	9_n	4.43
1.133	C8H8O	oBz	acetophenone	nitrogen	2018	August	6	7.42036	6_n	4.43
1.133	C8H8O	oBz	acetophenone	nitrogen	2018	August	11	7.47195	11_n	4.69
1.424	C8H10O2	oBz	2-phenoxy-ethanol	nitrogen	2018	June	9	5.67635	9_n	5.14
2.704	C24H38O4	oBz	diisooctyl phthalate	nitrogen	2018	August	6	5.27182	6_n	5.43
1.139	C8H8O	oBz	4-methyl-benzaldehyde	nitrogen	2018	June	6	15.113	6_n	5.61
1.133	C8H8O	oBz	acetophenone	nitrogen	2018	October	9	7.0328	9_n	5.76
2.704	C24H38O4	oBz	diisooctyl phthalate	nitrogen	2018	October	11	15.8085	11_n	7.79
0.94	C6H6O	oBz	phenol	nitrogen	2018	June	9	11.215	9_n	9.18
0.919	C7H6O	oBz	benzaldehyde	nitrogen	2018	October	11	18.5638	11_n	9.42
0.919	C7H6O	oBz	benzaldehyde	nitrogen	2018	October	6	19.0329	6_n	9.43
2.704	C24H38O4	oBz	diisooctyl phthalate	nitrogen	2018	August	9	9.48613	9_n	10.54
0.919	C7H6O	oBz	benzaldehyde	nitrogen	2018	August	11	23.624	11_n	13.46
1.133	C8H8O	oBz	acetophenone	nitrogen	2018	June	6	24.9133	6_n	13.6
0.919	C7H6O	oBz	benzaldehyde	nitrogen	2018	August	6	27.0411	6_n	16.57
0.919	C7H6O	oBz	benzaldehyde	nitrogen	2018	October	9	25.7941	9_n	18.21
2.704	C24H38O4	oBz	diisooctyl phthalate	nitrogen	2018	October	9	29.9559	9_n	24.44
0.919	C7H6O	oBz	benzaldehyde	nitrogen	2018	June	6	86.0511	6_n	44.36
2.704	C24H38O4	oBz	diisooctyl phthalate	nitrogen	2018	August	11	40.8736	11_n	45.44
2.704	C24H38O4	oBz	diisooctyl phthalate	nitrogen	2018	October	6	52.8787	6_n	47.89
1.48	C10H16O2	oMT	omt	nitrogen	2018	August	6	0.00493515	6_n	0.01
1.215	C10H16O	oMT	b-thujone	nitrogen	2018	August	9	0.00918721	9_n	0.01
1.19	C10H18O	oMT	linalool	nitrogen	2018	August	9	0.0946881	9_n	0.01
1.623		oMT	omt	nitrogen	2018	August	9	0.0201953	9_n	0.01
1.215	C10H16O	oMT	b-thujone	nitrogen	2018	August	11	0.0123982	11_n	0.01
1.215	C10H16O	oMT	b-thujone	nitrogen	2018	August	6	0.0145804	6_n	0.01
1.623		oMT	omt	nitrogen	2018	June	9	0.00480009	9_n	0.01
1.215	C10H16O	oMT	b-thujone	nitrogen	2018	October	11	0.00788346	11_n	0.01
1.215	C10H16O	oMT	b-thujone	nitrogen	2018	October	9	0.0100578	9_n	0.01
1.48	C10H16O2	oMT	omt	nitrogen	2018	October	6	0.00867891	6_n	0.01
1.635		oMT	omt	nitrogen	2018	October	11	0.0100822	11_n	0.01
1.215	C10H16O	oMT	b-thujone	nitrogen	2018	October	6	0.0143528	6_n	0.01
1.623		oMT	omt	nitrogen	2018	August	11	0.0261721	11_n	0.02
1.599	C10H16O	oMT	omt	nitrogen	2018	August	11	0.0284482	11_n	0.02
1.599	C10H16O	oMT	omt	nitrogen	2018	August	9	0.0281437	9_n	0.02
1.623		oMT	omt	nitrogen	2018	August	6	0.034134	6_n	0.02
1.48		oMT	omt	nitrogen	2018	June	6	0.0256922	6_n	0.02
1.48		oMT	omt	nitrogen	2018	June	9	0.028354	9_n	0.02
1.599	C10H16O	oMT	omt	nitrogen	2018	August	6	0.0383391	6_n	0.03
1.599	C10H16O	oMT	omt	nitrogen	2018	June	9	0.0416946	9_n	0.03
1.764		oMT	omt	nitrogen	2018	October	6	0.0242245	6_n	0.03
1.635		oMT	omt	nitrogen	2018	October	6	0.0262587	6_n	0.03
1.19	C10H18O	oMT	linalool	nitrogen	2018	August	11	0.12017	11_n	0.04
1.19	C10H18O	oMT	linalool	nitrogen	2018	August	6	0.124693	6_n	0.04
1.34	C10H20O	oMT	levomenthol	nitrogen	2018	June	6	0.291505	6_n	0.04
1.623		oMT	omt	nitrogen	2018	October	9	0.0372822	9_n	0.04
1.623		oMT	omt	nitrogen	2018	October	11	0.0421164	11_n	0.04
1.599	C10H16O	oMT	omt	nitrogen	2018	October	11	0.0469523	11_n	0.04
1.599	C10H16O	oMT	omt	nitrogen	2018	June	6	0.0647114	6_n	0.05
1.215	C10H16O	oMT	omt	nitrogen	2018	June	9	0.0855055	9_n	0.05
1.599	C10H16O	oMT	omt	nitrogen	2018	October	9	0.050605	9_n	0.05
1.19	C10H18O	oMT	linalool	nitrogen	2018	June	6	0.149953	6_n	0.06
1.215	C10H16O	oMT	omt	nitrogen	2018	June	6	0.107375	6_n	0.07
1.623		oMT	omt	nitrogen	2018	October	6	0.0730631	6_n	0.07
1.599	C10H16O	oMT	omt	nitrogen	2018	October	6	0.0878408	6_n	0.09
1.067	C10H18O	oMT	eucalyptol	nitrogen	2018	October	6	0.172233	6_n	0.1
1.19	C10H18O	oMT	linalool	nitrogen	2018	October	11	0.142194	11_n	0.1
1.067	C10H18O	oMT	eucalyptol	nitrogen	2018	June	6	0.261992	6_n	0.11
1.067	C10H18O	oMT	eucalyptol	nitrogen	2018	October	11	0.182799	11_n	0.11
1.19	C10H18O	oMT	linalool	nitrogen	2018	October	9	0.152063	9_n	0.12
1.19	C10H18O	oMT	linalool	nitrogen	2018	October	6	0.182802	6_n	0.14
1.067	C10H18O	oMT	eucalyptol	nitrogen	2018	October	9	0.213934	9_n	0.15
1.132		oMT	omt	nitrogen	2018	June	6	0.599928	6_n	0.2
1.067	C10H18O	oMT	eucalyptol	nitrogen	2018	June	9	0.461952	9_n	0.35
1.34	C10H20O	oMT	levomenthol	nitrogen	2018	June	9	0.568426	9_n	0.38
1.132		oMT	omt	nitrogen	2018	June	9	0.903694	9_n	0.58
2.049	C15H24O	oST	caryophyllene oxide	nitrogen	2018	August	9	0.0479717	9_n	0.01
2.049	C15H24O	oST	caryophyllene oxide	nitrogen	2018	August	6	0.0508433	6_n	0.01
2.148	C15H24O	oST	ost	nitrogen	2018	June	6	0.0827627	6_n	0.02
2.148	C15H24O	oST	ost	nitrogen	2018	October	9	0.0544501	9_n	0.02
2.117	C15H24O	oST	ost	nitrogen	2018	August	9	0.050149	9_n	0.03
2.148	C15H24O	oST	ost	nitrogen	2018	October	11	0.0588678	11_n	0.03
2.148	C15H24O	oST	ost	nitrogen	2018	August	6	0.121055	6_n	0.04
2.117	C15H24O	oST	ost	nitrogen	2018	August	11	0.0676118	11_n	0.04
2.118	C15H24O	oST	ost	nitrogen	2018	June	9	0.0849333	9_n	0.04
2.165	C15H24O	oST	ost	nitrogen	2018	June	6	0.139282	6_n	0.04
2.117	C15H24O	oST	ost	nitrogen	2018	August	6	0.0731368	6_n	0.05
2.118	C15H24O	oST	ost	nitrogen	2018	June	6	0.0952685	6_n	0.05
2.049	C15H24O	oST	caryophyllene oxide	nitrogen	2018	June	6	0.0521306	6_n	0.06
2.117	C15H24O	oST	ost	nitrogen	2018	October	11	0.0656402	11_n	0.06
2.049	C15H24O	oST	caryophyllene oxide	nitrogen	2018	October	9	0.0836888	9_n	0.08
2.148	C15H24O	oST	ost	nitrogen	2018	June	9	0.133011	9_n	0.09
2.117	C15H24O	oST	ost	nitrogen	2018	June	9	0.217163	9_n	0.11
2.165	C15H24O	oST	ost	nitrogen	2018	June	9	0.192017	9_n	0.11
1.986	C15H26O	oST	nerolidol	nitrogen	2018	June	6	0.569264	6_n	0.15
2.148	C15H24O	oST	ost	nitrogen	2018	October	6	0.170334	6_n	0.15
2.117	C15H24O	oST	ost	nitrogen	2018	October	9	0.144016	9_n	0.15
2.049	C15H24O	oST	caryophyllene oxide	nitrogen	2018	June	9	0.14486	9_n	0.17
1.986	C15H26O	oST	nerolidol	nitrogen	2018	August	11	0.345329	11_n	0.19
1.986	C15H26O	oST	nerolidol	nitrogen	2018	August	6	0.377592	6_n	0.22
2.087	C15H24O	oST	ost	nitrogen	2018	August	6	0.32434	6_n	0.24
2.049	C15H24O	oST	caryophyllene oxide	nitrogen	2018	October	6	0.2341	6_n	0.24
1.986	C15H26O	oST	nerolidol	nitrogen	2018	August	9	0.395543	9_n	0.26
2.117	C15H24O	oST	ost	nitrogen	2018	October	6	0.25073	6_n	0.26
2.087	C15H24O	oST	ost	nitrogen	2018	August	11	0.338387	11_n	0.27
1.986	C15H26O	oST	nerolidol	nitrogen	2018	June	9	0.656215	9_n	0.28
2.087	C15H24O	oST	ost	nitrogen	2018	August	9	0.413319	9_n	0.36
2.165	C15H24O	oST	ost	nitrogen	2018	August	6	0.383694	6_n	0.36
1.986	C15H26O	oST	nerolidol	nitrogen	2018	October	11	0.472836	11_n	0.41
1.986	C15H26O	oST	nerolidol	nitrogen	2018	October	9	0.465672	9_n	0.42
2.165	C15H24O	oST	ost	nitrogen	2018	October	11	0.471325	11_n	0.42
2.087	C15H24O	oST	ost	nitrogen	2018	October	11	0.501	11_n	0.44
2.087	C15H24O	oST	ost	nitrogen	2018	October	9	0.623856	9_n	0.59
2.165	C15H24O	oST	ost	nitrogen	2018	August	11	0.582937	11_n	0.6
2.165	C15H24O	oST	ost	nitrogen	2018	August	9	0.590629	9_n	0.62
1.986	C15H26O	oST	nerolidol	nitrogen	2018	October	6	1.12259	6_n	1.11
2.165	C15H24O	oST	ost	nitrogen	2018	October	6	1.19175	6_n	1.19
2.087	C15H24O	oST	ost	nitrogen	2018	October	6	1.89665	6_n	1.95
1.277		other	ovoc	nitrogen	2018	August	9	0.00559772	9_n	0.01
1.277		other	ovoc	nitrogen	2018	August	11	0.00734993	11_n	0.01
1.779		other	other	nitrogen	2018	June	9	0.0234929	9_n	0.01
1.277		other	ovoc	nitrogen	2018	October	11	0.00801992	11_n	0.01
1.277		other	ovoc	nitrogen	2018	October	9	0.00941791	9_n	0.01
1.424		other	other	nitrogen	2018	October	9	0.0276048	9_n	0.01
1.277		other	ovoc	nitrogen	2018	October	6	0.0134426	6_n	0.01
1.665		other	other	nitrogen	2018	October	11	0.0159099	11_n	0.02
2.039	C16H30O4	other	pentanoic acid, 2,2,4-trimethyl-3-carboxyisopropyl, isobutyl ester	nitrogen	2018	October	9	0.05215	9_n	0.02
1.665		other	other	nitrogen	2018	October	6	0.0303796	6_n	0.03
1.424		other	other	nitrogen	2018	August	11	0.0516048	11_n	0.05
1.424		other	other	nitrogen	2018	October	11	0.0706119	11_n	0.06
2.039	C16H30O4	other	pentanoic acid, 2,2,4-trimethyl-3-carboxyisopropyl, isobutyl ester	nitrogen	2018	August	6	0.0744447	6_n	0.07
1.424		other	other	nitrogen	2018	October	6	0.0879471	6_n	0.08
2.039	C16H30O4	other	pentanoic acid, 2,2,4-trimethyl-3-carboxyisopropyl, isobutyl ester	nitrogen	2018	October	11	0.106227	11_n	0.08
0.403		other	other	nitrogen	2018	August	6	0.366568	6_n	0.09
1.424		other	other	nitrogen	2018	August	6	0.0903682	6_n	0.09
1.424		other	other	nitrogen	2018	August	9	0.106201	9_n	0.11
2.039	C16H30O4	other	pentanoic acid, 2,2,4-trimethyl-3-carboxyisopropyl, isobutyl ester	nitrogen	2018	August	11	0.108997	11_n	0.11
2.039	C16H30O4	other	pentanoic acid, 2,2,4-trimethyl-3-carboxyisopropyl, isobutyl ester	nitrogen	2018	August	9	0.10967	9_n	0.12
0.403		other	other	nitrogen	2018	October	6	0.524972	6_n	0.16
0.403		other	other	nitrogen	2018	August	11	0.438599	11_n	0.18
0.403		other	other	nitrogen	2018	October	11	0.528212	11_n	0.18
1.044		other	other	nitrogen	2018	October	6	0.647938	6_n	0.21
2.039	C16H30O4	other	pentanoic acid, 2,2,4-trimethyl-3-carboxyisopropyl, isobutyl ester	nitrogen	2018	October	6	0.332958	6_n	0.33
0.44	C8H16	other	2,4,4-trimethyl-1-pentene	nitrogen	2018	June	6	0.57991	6_n	0.35
1.044		other	other	nitrogen	2018	October	11	0.767474	11_n	0.36
1.044		other	other	nitrogen	2018	October	9	0.76899	9_n	0.38
1.278		other	ovoc	nitrogen	2018	June	6	1.77722	6_n	0.58
0.403		other	other	nitrogen	2018	October	9	0.92822	9_n	0.65
1.277		other	ovoc	nitrogen	2018	June	6	2.5502	6_n	1.02
0.44	C8H16	other	2,4,4-trimethyl-1-pentene	nitrogen	2018	October	6	2.20753	6_n	1.28
0.44	C8H16	other	2,4,4-trimethyl-1-pentene	nitrogen	2018	October	9	2.13787	9_n	1.32
0.44	C8H16	other	2,4,4-trimethyl-1-pentene	nitrogen	2018	October	11	3.09536	11_n	2.33
1.278		other	ovoc	nitrogen	2018	June	9	3.84311	9_n	3.04
1.277		other	ovoc	nitrogen	2018	June	9	4.69484	9_n	3.61
0.44	C8H16	other	2,4,4-trimethyl-1-pentene	nitrogen	2018	August	11	8.11323	11_n	4.8
1.565		ovoc	ovoc	nitrogen	2018	August	6	0.0082593	6_n	0.01
1.681		ovoc	ovoc	nitrogen	2018	August	6	0.0103336	6_n	0.01
1.565		ovoc	ovoc	nitrogen	2018	August	9	0.00993986	9_n	0.01
1.023	C9H18O	ovoc	methoxy-cyclooctane	nitrogen	2018	August	11	0.00951102	11_n	0.01
0.628	C7H14O	ovoc	1-methoxy-2-hexene	nitrogen	2018	August	11	0.00837855	11_n	0.01
0.905		ovoc	ovoc	nitrogen	2018	August	6	0.0126052	6_n	0.01
1.023	C9H18O	ovoc	methoxy-cyclooctane	nitrogen	2018	August	6	0.0136606	6_n	0.01
0.905		ovoc	ovoc	nitrogen	2018	August	9	0.0140072	9_n	0.01
0.628	C7H14O	ovoc	1-methoxy-2-hexene	nitrogen	2018	August	6	0.0136074	6_n	0.01
1.565		ovoc	ovoc	nitrogen	2018	June	6	0.0113966	6_n	0.01
1.565		ovoc	ovoc	nitrogen	2018	June	9	0.0113745	9_n	0.01
1.331	C10H22O2	ovoc	octanal dimethyl acetal	nitrogen	2018	June	6	0.0147246	6_n	0.01
1.565		ovoc	ovoc	nitrogen	2018	October	11	0.00690132	11_n	0.01
1.681		ovoc	ovoc	nitrogen	2018	October	9	0.00472665	9_n	0.01
1.565		ovoc	ovoc	nitrogen	2018	October	6	0.00855357	6_n	0.01
1.78	C10H16O2	ovoc	trans-4-hydroxy-3-methyl-6-(1-methylethyl)-2-cyclohexen-1-one	nitrogen	2018	October	9	0.00691081	9_n	0.01
1.681		ovoc	ovoc	nitrogen	2018	October	11	0.00775975	11_n	0.01
1.565		ovoc	ovoc	nitrogen	2018	October	9	0.0111595	9_n	0.01
1.511		ovoc	ovoc	nitrogen	2018	October	6	0.011874	6_n	0.01
1.681		ovoc	ovoc	nitrogen	2018	October	6	0.0128316	6_n	0.01
1.079	C9H18O	ovoc	ovoc	nitrogen	2018	August	11	0.019852	11_n	0.02
0.905		ovoc	ovoc	nitrogen	2018	August	11	0.0181948	11_n	0.02
0.943		ovoc	ovoc	nitrogen	2018	August	9	0.0456572	9_n	0.02
0.943		ovoc	ovoc	nitrogen	2018	August	6	0.0489229	6_n	0.02
2.25		ovoc	ovoc	nitrogen	2018	June	9	0.490878	9_n	0.02
0.396	C4H8O2	ovoc	1,3-dioxane	nitrogen	2018	June	6	0.0722348	6_n	0.02
1.079	C9H18O	ovoc	ovoc	nitrogen	2018	October	11	0.0150954	11_n	0.02
1.023	C9H18O	ovoc	methoxy-cyclooctane	nitrogen	2018	October	6	0.0199451	6_n	0.02
1.023	C9H18O	ovoc	methoxy-cyclooctane	nitrogen	2018	October	9	0.0195903	9_n	0.02
0.905		ovoc	ovoc	nitrogen	2018	October	11	0.019052	11_n	0.02
1.023	C9H18O	ovoc	methoxy-cyclooctane	nitrogen	2018	October	11	0.0213297	11_n	0.02
1.079	C9H18O	ovoc	ovoc	nitrogen	2018	August	6	0.0315649	6_n	0.03
1.079	C9H18O	ovoc	ovoc	nitrogen	2018	August	9	0.0303808	9_n	0.03
0.905		ovoc	ovoc	nitrogen	2018	October	6	0.0292676	6_n	0.03
1.079	C9H18O	ovoc	ovoc	nitrogen	2018	October	6	0.0313379	6_n	0.03
0.943		ovoc	ovoc	nitrogen	2018	June	6	0.0557833	6_n	0.04
1.079	C9H18O	ovoc	ovoc	nitrogen	2018	October	9	0.0305816	9_n	0.04
0.943		ovoc	ovoc	nitrogen	2018	October	11	0.0521073	11_n	0.04
0.905		ovoc	ovoc	nitrogen	2018	October	9	0.0359774	9_n	0.04
0.943		ovoc	ovoc	nitrogen	2018	August	11	0.0692898	11_n	0.05
1.023	C9H18O	ovoc	methoxy-cyclooctane	nitrogen	2018	August	9	0.0431236	9_n	0.05
0.574		ovoc	ovoc	nitrogen	2018	June	6	0.51707	6_n	0.05
1.511		ovoc	ovoc	nitrogen	2018	June	6	0.0773063	6_n	0.05
1.664		ovoc	ovoc	nitrogen	2018	June	6	0.146039	6_n	0.05
1.78	C10H16O2	ovoc	trans-4-hydroxy-3-methyl-6-(1-methylethyl)-2-cyclohexen-1-one	nitrogen	2018	October	6	0.0460384	6_n	0.05
0.943		ovoc	ovoc	nitrogen	2018	June	9	0.0702554	9_n	0.06
0.943		ovoc	ovoc	nitrogen	2018	October	6	0.0732884	6_n	0.06
0.943		ovoc	ovoc	nitrogen	2018	October	9	0.0739029	9_n	0.06
2.25		ovoc	ovoc	nitrogen	2018	June	6	0.570448	6_n	0.08
2.12		ovoc	ovoc	nitrogen	2018	June	6	0.531229	6_n	0.1
0.396	C4H8O2	ovoc	1,3-dioxane	nitrogen	2018	October	11	0.715027	11_n	0.14
2.12		ovoc	ovoc	nitrogen	2018	June	9	0.559851	9_n	0.16
1.511		ovoc	ovoc	nitrogen	2018	June	9	0.18554	9_n	0.18
2.526		ovoc	ovoc	nitrogen	2018	August	11	0.252232	11_n	0.21
0.435	C5H10O3	ovoc	1,3,6-trioxocane	nitrogen	2018	August	9	1.03754	9_n	0.23
1.664		ovoc	ovoc	nitrogen	2018	June	9	0.30526	9_n	0.24
0.435	C5H10O3	ovoc	1,3,6-trioxocane	nitrogen	2018	October	11	0.851899	11_n	0.31
0.574		ovoc	ovoc	nitrogen	2018	August	11	1.99508	11_n	0.38
2.526		ovoc	ovoc	nitrogen	2018	October	11	0.451252	11_n	0.39
0.898	C6H12O	ovoc	ovoc	nitrogen	2018	August	9	1.1071	9_n	0.44
2.421	C14H24O3Si2	ovoc	ovoc	nitrogen	2018	June	6	1.00738	6_n	0.44
0.656		ovoc	ovoc	nitrogen	2018	June	9	0.892963	9_n	0.46
0.396	C4H8O2	ovoc	1,3-dioxane	nitrogen	2018	October	6	1.05601	6_n	0.49
0.656		ovoc	ovoc	nitrogen	2018	June	6	1.10684	6_n	0.65
0.435	C5H10O3	ovoc	1,3,6-trioxocane	nitrogen	2018	August	6	1.52263	6_n	0.7
0.898	C6H12O	ovoc	ovoc	nitrogen	2018	August	6	1.58666	6_n	0.9
0.435	C5H10O3	ovoc	1,3,6-trioxocane	nitrogen	2018	October	6	1.4436	6_n	0.94
0.435	C5H10O3	ovoc	1,3,6-trioxocane	nitrogen	2018	August	11	1.72776	11_n	0.97
0.574		ovoc	ovoc	nitrogen	2018	October	6	1.97054	6_n	1.06
0.797	C6H14O2	ovoc	2-butoxy ethanol	nitrogen	2018	June	9	1.13697	9_n	1.1
0.574		ovoc	ovoc	nitrogen	2018	October	11	2.06214	11_n	1.22
0.396	C4H8O2	ovoc	1,3-dioxane	nitrogen	2018	August	6	2.39729	6_n	1.3
0.898	C6H12O	ovoc	ovoc	nitrogen	2018	August	11	1.93145	11_n	1.33
0.898	C6H12O	ovoc	ovoc	nitrogen	2018	October	6	1.71914	6_n	1.35
0.396	C4H8O2	ovoc	1,3-dioxane	nitrogen	2018	October	9	1.78746	9_n	1.39
2.526		ovoc	ovoc	nitrogen	2018	August	9	1.3424	9_n	1.47
0.396	C4H8O2	ovoc	1,3-dioxane	nitrogen	2018	August	11	2.55608	11_n	1.54
0.435	C5H10O3	ovoc	1,3,6-trioxocane	nitrogen	2018	October	9	1.91859	9_n	1.56
0.898	C6H12O	ovoc	ovoc	nitrogen	2018	October	11	1.94184	11_n	1.65
0.574		ovoc	ovoc	nitrogen	2018	October	9	2.39265	9_n	1.65
0.898	C6H12O	ovoc	ovoc	nitrogen	2018	October	9	2.15182	9_n	1.94
2.545		ovoc	ovoc	nitrogen	2018	August	6	3.23956	6_n	2.25
2.526		ovoc	ovoc	nitrogen	2018	October	6	2.27794	6_n	2.37
2.545		ovoc	ovoc	nitrogen	2018	August	9	4.06244	9_n	3.37
2.545		ovoc	ovoc	nitrogen	2018	October	9	4.93954	9_n	4.23
2.545		ovoc	ovoc	nitrogen	2018	October	11	5.65697	11_n	4.9
2.545		ovoc	ovoc	nitrogen	2018	October	6	10.3313	6_n	9.86
2.545		ovoc	ovoc	nitrogen	2018	August	11	14.3955	11_n	14.83
1.898	C15H24	ST	a-farnesene	nitrogen	2018	June	6	0.00517329	6_n	0.01
1.94	C15H24	ST	a-bisabolene	nitrogen	2018	June	6	0.00909469	6_n	0.01
2.07	C15H24O	ST	ost	nitrogen	2018	June	9	0.0125318	9_n	0.01
1.898	C15H24	ST	a-farnesene	nitrogen	2018	June	9	0.00992883	9_n	0.01
1.898	C15H24	ST	a-farnesene	nitrogen	2018	October	11	0.0093242	11_n	0.01
1.835	C15H22	ST	st	nitrogen	2018	October	11	0.0193387	11_n	0.01
1.792	C15H24	ST	b-caryophyllene	nitrogen	2018	August	11	0.0728275	11_n	0.02
1.846	C15H24	ST	a-humulene	nitrogen	2018	June	6	0.0167145	6_n	0.02
1.846	C15H24	ST	a-humulene	nitrogen	2018	June	9	0.0212856	9_n	0.02
1.835	C15H22	ST	st	nitrogen	2018	October	9	0.0280642	9_n	0.02
1.898	C15H24	ST	a-farnesene	nitrogen	2018	October	9	0.0201614	9_n	0.02
1.792	C15H24	ST	b-caryophyllene	nitrogen	2018	August	6	0.0808074	6_n	0.03
1.792	C15H24	ST	b-caryophyllene	nitrogen	2018	August	9	0.0778494	9_n	0.03
1.823	C15H24	ST	aromandendrene	nitrogen	2018	August	11	0.148123	11_n	0.04
2.07	C15H24O	ST	ost	nitrogen	2018	October	6	0.0382211	6_n	0.04
1.835	C15H22	ST	st	nitrogen	2018	October	6	0.0483581	6_n	0.04
1.823	C15H24	ST	aromandendrene	nitrogen	2018	August	6	0.158011	6_n	0.05
1.792	C15H24	ST	b-caryophyllene	nitrogen	2018	June	6	0.0983128	6_n	0.05
1.898	C15H24	ST	a-farnesene	nitrogen	2018	October	6	0.041989	6_n	0.05
1.94	C15H24	ST	a-bisabolene	nitrogen	2018	August	11	0.128475	11_n	0.08
1.818	C15H24	ST	st	nitrogen	2018	June	6	0.123162	6_n	0.08
1.846	C15H24	ST	a-humulene	nitrogen	2018	October	11	0.0993104	11_n	0.08
1.94	C15H24	ST	a-bisabolene	nitrogen	2018	August	6	0.143011	6_n	0.09
1.818	C15H24	ST	st	nitrogen	2018	June	9	0.128588	9_n	0.09
1.846	C15H24	ST	a-humulene	nitrogen	2018	October	9	0.116973	9_n	0.1
1.94	C15H24	ST	a-bisabolene	nitrogen	2018	August	9	0.149554	9_n	0.11
1.792	C15H24	ST	b-caryophyllene	nitrogen	2018	October	11	0.119156	11_n	0.11
1.792	C15H24	ST	b-caryophyllene	nitrogen	2018	June	9	0.153358	9_n	0.12
1.823	C15H24	ST	aromandendrene	nitrogen	2018	August	9	0.221018	9_n	0.13
1.835	C15H22	ST	st	nitrogen	2018	June	6	0.253913	6_n	0.13
1.792	C15H24	ST	b-caryophyllene	nitrogen	2018	October	9	0.138035	9_n	0.13
1.94	C15H24	ST	a-bisabolene	nitrogen	2018	October	9	0.176857	9_n	0.15
1.823	C15H24	ST	aromandendrene	nitrogen	2018	June	6	0.292805	6_n	0.17
1.94	C15H24	ST	a-bisabolene	nitrogen	2018	October	11	0.195261	11_n	0.17
1.835	C15H22	ST	st	nitrogen	2018	June	9	0.292802	9_n	0.19
1.846	C15H24	ST	a-humulene	nitrogen	2018	October	6	0.234546	6_n	0.22
1.823	C15H24	ST	aromandendrene	nitrogen	2018	October	9	0.253169	9_n	0.23
1.823	C15H24	ST	aromandendrene	nitrogen	2018	October	11	0.260029	11_n	0.23
1.792	C15H24	ST	b-caryophyllene	nitrogen	2018	October	6	0.246545	6_n	0.24
1.823	C15H24	ST	aromandendrene	nitrogen	2018	June	9	0.358128	9_n	0.26
1.94	C15H24	ST	a-bisabolene	nitrogen	2018	October	6	0.459015	6_n	0.45
1.823	C15H24	ST	aromandendrene	nitrogen	2018	October	6	0.528844	6_n	0.52
1.461	C7H11NS	sulfo	isothiocyanato-cyclohexane	nitrogen	2018	June	6	0.034493	6_n	0.03
1.017	C8H18S	sulfo	sulfo	nitrogen	2018	June	9	0.0966678	9_n	0.03
1.017	C8H18S	sulfo	sulfo	nitrogen	2018	June	6	0.130413	6_n	0.06
1.461	C7H11NS	sulfo	isothiocyanato-cyclohexane	nitrogen	2018	June	9	0.32578	9_n	0.37
0.77	C6H8O2	acid	sorbic acid	nitrogen	2019	October	6	0.00504356	6_n	0.01
0.944	C8H16O	alcohol	1-octen-3-ol	nitrogen	2019	August	9	0.393339	9_n	0.02
0.944	C8H16O	alcohol	1-octen-3-ol	nitrogen	2019	August	6	0.457582	6_n	0.11
1.043	C8H18O	alcohol	2-ethyl-1-hexanol	nitrogen	2019	August	11	5.88519	11_n	0.29
0.944	C8H16O	alcohol	1-octen-3-ol	nitrogen	2019	October	6	0.829518	6_n	0.39
0.696	C6H12O	alcohol	cis-3-hexen-1-ol	nitrogen	2019	October	6	1.15749	6_n	1.01
1.043	C8H18O	alcohol	2-ethyl-1-hexanol	nitrogen	2019	October	6	7.21482	6_n	3.68
1.198	C9H18O	aldehyde	nonanal	nitrogen	2019	August	11	2.46845	11_n	0.08
0.691	C6H10O	aldehyde	trans-2-hexen-1-al	nitrogen	2019	October	9	0.197682	9_n	0.09
0.801	C7H14O	aldehyde	heptanal	nitrogen	2019	October	9	2.90021	9_n	0.1
0.42	C5H10O	aldehyde	pentanal	nitrogen	2019	August	9	1.05841	9_n	0.35
0.801	C7H14O	aldehyde	heptanal	nitrogen	2019	August	9	1.62855	9_n	0.43
0.995	C8H16O	aldehyde	octanal	nitrogen	2019	October	9	3.83295	9_n	0.45
1.388	C10H20O	aldehyde	decanal	nitrogen	2019	October	9	2.3893	9_n	0.53
0.995	C8H16O	aldehyde	octanal	nitrogen	2019	August	9	1.83109	9_n	0.64
0.42	C5H10O	aldehyde	pentanal	nitrogen	2019	August	6	1.28822	6_n	0.68
0.587	C6H12O	aldehyde	hexanal	nitrogen	2019	August	9	2.5891	9_n	0.91
1.198	C9H18O	aldehyde	nonanal	nitrogen	2019	August	9	3.20731	9_n	1
0.801	C7H14O	aldehyde	heptanal	nitrogen	2019	August	6	2.28974	6_n	1.32
0.691	C6H10O	aldehyde	trans-2-hexen-1-al	nitrogen	2019	October	6	1.22162	6_n	1.33
0.995	C8H16O	aldehyde	octanal	nitrogen	2019	August	6	2.76647	6_n	1.86
0.587	C6H12O	aldehyde	hexanal	nitrogen	2019	August	6	3.41979	6_n	2.04
1.198	C9H18O	aldehyde	nonanal	nitrogen	2019	August	6	3.93885	6_n	2.05
0.42	C5H10O	aldehyde	pentanal	nitrogen	2019	October	6	6.76594	6_n	5.42
1.388	C10H20O	aldehyde	decanal	nitrogen	2019	October	6	9.03119	6_n	8.63
1.198	C9H18O	aldehyde	nonanal	nitrogen	2019	October	9	12.3088	9_n	8.82
0.995	C8H16O	aldehyde	octanal	nitrogen	2019	October	6	10.9703	6_n	9.22
0.801	C7H14O	aldehyde	heptanal	nitrogen	2019	October	6	10.4264	6_n	9.29
0.587	C6H12O	aldehyde	hexanal	nitrogen	2019	October	6	17.1627	6_n	15.59
1.198	C9H18O	aldehyde	nonanal	nitrogen	2019	October	6	19.0853	6_n	17.62
0.818	C9H18	alkane	alkane	nitrogen	2019	October	9	0.0186133	9_n	0.01
0.406	C8H18	alkane	2,2,3,3-tetramethyl-butane	nitrogen	2019	October	9	0.568367	9_n	0.01
0.339	C6H12	alkane	methyl cyclopentane	nitrogen	2019	October	6	0.12246	6_n	0.01
0.466	C7H14	alkane	methyl cyclohexane	nitrogen	2019	October	6	0.0567946	6_n	0.01
0.796	C9H20	alkane	nonane	nitrogen	2019	August	11	3.43485	11_n	0.01
0.466	C7H14	alkane	methyl cyclohexane	nitrogen	2019	October	11	0.067369	11_n	0.02
0.339	C6H12	alkane	methyl cyclopentane	nitrogen	2019	October	11	0.141239	11_n	0.02
0.466	C7H14	alkane	methyl cyclohexane	nitrogen	2019	August	6	0.109851	6_n	0.02
0.536	C8H18	alkane	2-methyl-heptane	nitrogen	2019	October	6	0.0642135	6_n	0.04
1.084		alkane	alkane	nitrogen	2019	October	11	0.0647356	11_n	0.04
0.389	C7H16	alkane	3-methyl-hexane	nitrogen	2019	August	9	0.198088	9_n	0.04
0.466	C7H14	alkane	methyl cyclohexane	nitrogen	2019	August	9	0.135515	9_n	0.04
0.818	C9H18	alkane	alkane	nitrogen	2019	October	6	0.0528934	6_n	0.05
0.657		alkane	alkane	nitrogen	2019	October	6	0.0578636	6_n	0.05
1.084		alkane	alkane	nitrogen	2019	October	9	0.0730049	9_n	0.05
0.389	C7H16	alkane	3-methyl-hexane	nitrogen	2019	August	6	0.19215	6_n	0.05
1.175	C13H28	alkane	alkane	nitrogen	2019	August	11	0.112177	11_n	0.05
0.918	C10H20	alkane	alkane	nitrogen	2019	August	6	0.524729	6_n	0.05
0.63	C9H20	alkane	2,4-dimethyl-heptane	nitrogen	2019	August	6	0.54994	6_n	0.05
0.421	C7H16	alkane	heptane	nitrogen	2019	August	9	0.567533	9_n	0.05
1.648	C14H30	alkane	tetradecane	nitrogen	2019	August	11	0.343022	11_n	0.05
0.306	C6H14	alkane	hexane	nitrogen	2019	October	11	0.673992	11_n	0.06
0.911		alkane	alkane	nitrogen	2019	October	6	0.235303	6_n	0.06
0.728	C9H20	alkane	2-methyl-octane	nitrogen	2019	October	6	0.108456	6_n	0.06
0.406	C8H18	alkane	2,2,3,3-tetramethyl-butane	nitrogen	2019	October	11	0.632892	11_n	0.06
0.67	C9H20	alkane	2,5-dimethyl-heptane	nitrogen	2019	October	6	0.0694384	6_n	0.06
0.988	C10H22	alkane	decane	nitrogen	2019	August	11	0.19946	11_n	0.06
0.536	C8H18	alkane	2-methyl-heptane	nitrogen	2019	August	6	0.509301	6_n	0.06
0.918	C10H20	alkane	alkane	nitrogen	2019	August	11	0.575911	11_n	0.06
0.728	C9H20	alkane	2-methyl-octane	nitrogen	2019	August	6	0.629982	6_n	0.06
0.818	C9H18	alkane	alkane	nitrogen	2019	August	6	0.299018	6_n	0.06
0.918	C10H20	alkane	alkane	nitrogen	2019	October	6	0.0956947	6_n	0.07
[truncated: 2,642 more rows]
